# Supplementary material
Source: publisher figshare collection journal article supplement (https://frontiersin.figshare.com/ndownloader/files/14617067)

**Supplementary Figure S8.** Sensitivity analyses for meta-analysis of miR-196a-2 rs11614913 and cancer risk under different genetic models in order to detect potential influential studies using leave-one-out approach. **A)** Homozygote; **B)** Heterozygote; **C)** Dominant; **D)** Recessive **E)** allele contrast. Each line represents the overall estimate while omitting one study

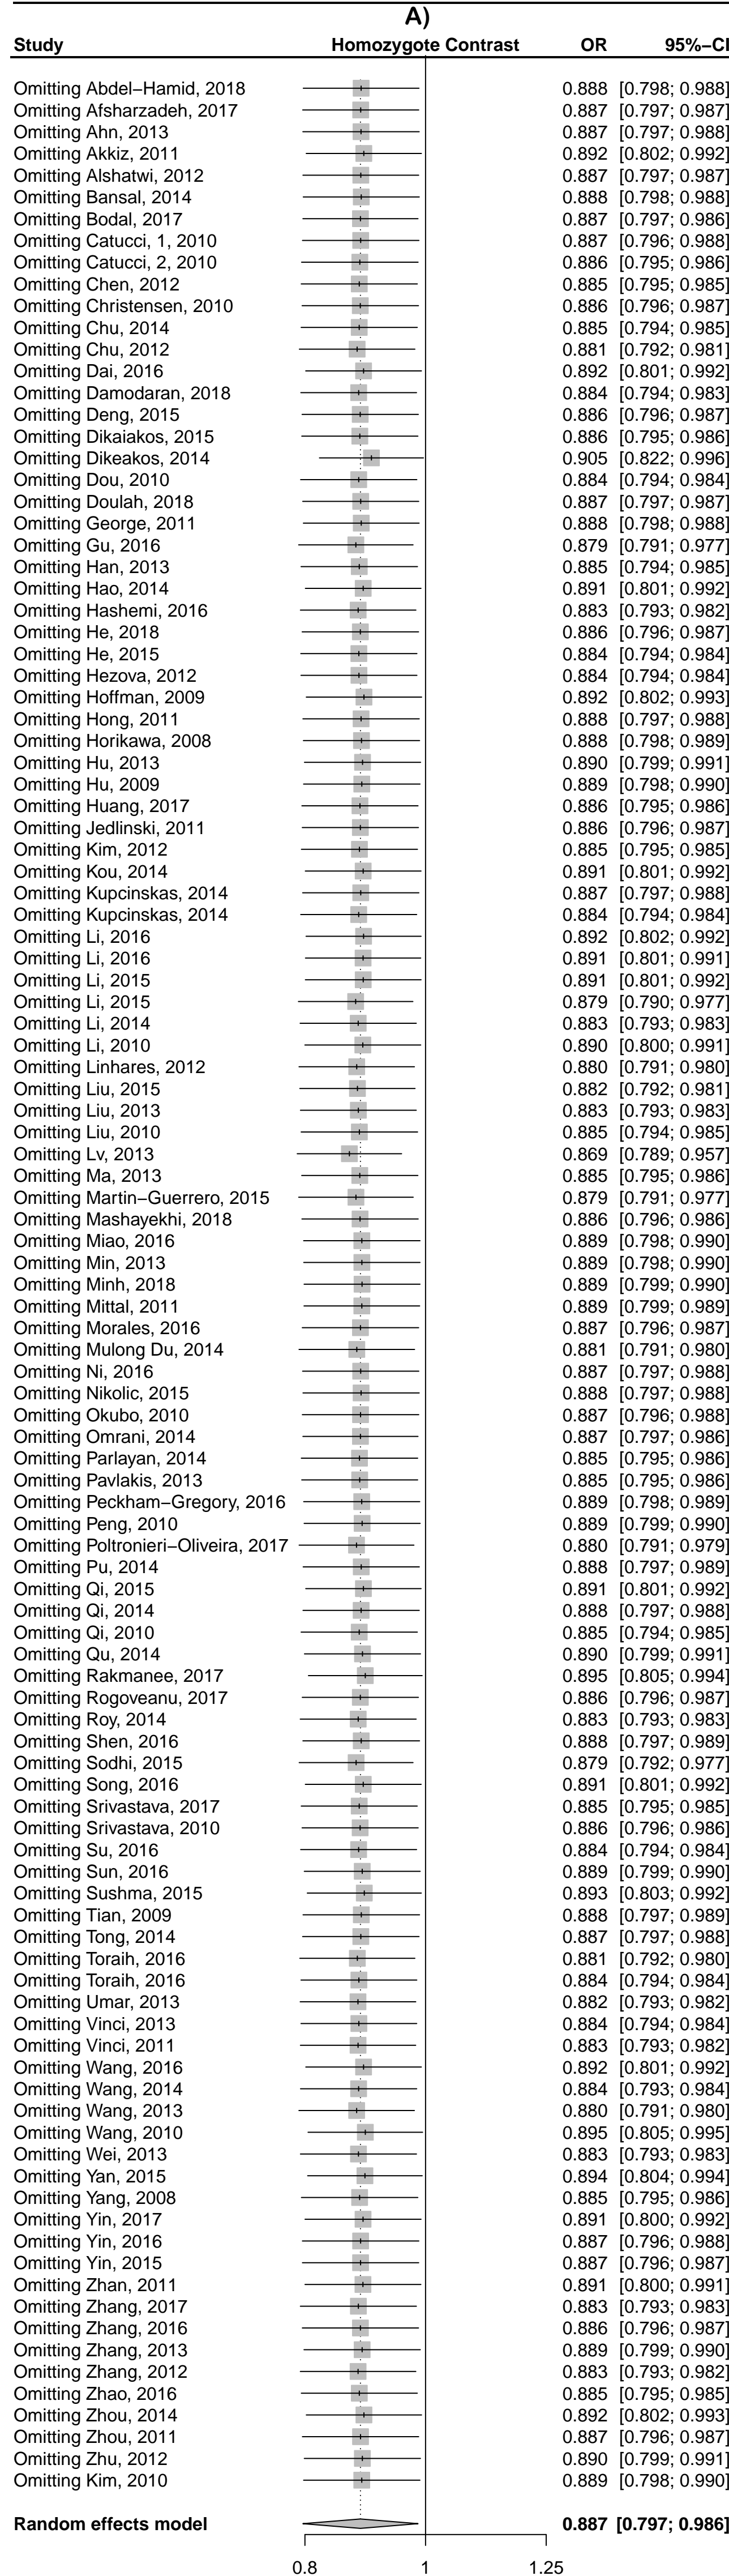

B)

| Study                               | Heterozygote Contrast                                                               | OR    | 95%-CI         |
|-------------------------------------|-------------------------------------------------------------------------------------|-------|----------------|
| Omitting Abdel-Hamid, 2018          | 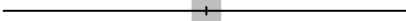   | 1.000 | [0.928; 1.078] |
| Omitting Afsharzadeh, 2017          |    | 1.005 | [0.932; 1.084] |
| Omitting Ahn, 2013                  |    | 1.003 | [0.930; 1.082] |
| Omitting Akkiz, 2011                |    | 1.004 | [0.931; 1.083] |
| Omitting Alshatwi, 2012             |    | 0.999 | [0.926; 1.076] |
| Omitting Bansal, 2014               |    | 1.003 | [0.930; 1.082] |
| Omitting Bodal, 2017                |    | 0.998 | [0.926; 1.076] |
| Omitting Catucci, 1, 2010           |    | 1.002 | [0.929; 1.082] |
| Omitting Catucci, 2, 2010           |    | 1.002 | [0.929; 1.081] |
| Omitting Chen, 2012                 |    | 1.001 | [0.928; 1.080] |
| Omitting Christensen, 2010          |    | 1.004 | [0.931; 1.083] |
| Omitting Chu, 2014                  |    | 1.003 | [0.930; 1.082] |
| Omitting Chu, 2012                  |    | 0.995 | [0.924; 1.072] |
| Omitting Dai, 2016                  |    | 1.005 | [0.932; 1.084] |
| Omitting Damodaran, 2018            |    | 0.997 | [0.926; 1.075] |
| Omitting Deng, 2015                 |    | 1.007 | [0.934; 1.085] |
| Omitting Dikaiakos, 2015            |    | 1.003 | [0.930; 1.082] |
| Omitting Dikeakos, 2014             |    | 1.018 | [0.953; 1.088] |
| Omitting Dou, 2010                  |    | 0.998 | [0.925; 1.076] |
| Omitting Doulah, 2018               |    | 1.005 | [0.932; 1.083] |
| Omitting George, 2011               |    | 0.997 | [0.925; 1.075] |
| Omitting Gu, 2016                   |   | 0.999 | [0.927; 1.077] |
| Omitting Han, 2013                  |  | 1.001 | [0.928; 1.079] |
| Omitting Hao, 2014                  |  | 1.005 | [0.932; 1.084] |
| Omitting Hashemi, 2016              |  | 1.001 | [0.928; 1.079] |
| Omitting He, 2018                   |  | 1.003 | [0.929; 1.082] |
| Omitting He, 2015                   |  | 1.000 | [0.927; 1.079] |
| Omitting Hezova, 2012               |  | 1.003 | [0.930; 1.081] |
| Omitting Hoffman, 2009              |  | 1.004 | [0.931; 1.083] |
| Omitting Hong, 2011                 |  | 1.000 | [0.927; 1.078] |
| Omitting Horikawa, 2008             |  | 1.002 | [0.928; 1.080] |
| Omitting Hu, 2013                   |  | 1.006 | [0.933; 1.085] |
| Omitting Hu, 2009                   |  | 1.004 | [0.931; 1.083] |
| Omitting Huang, 2017                |  | 1.001 | [0.929; 1.080] |
| Omitting Jedlinski, 2011            |  | 1.003 | [0.930; 1.082] |
| Omitting Kim, 2012                  |  | 1.002 | [0.929; 1.080] |
| Omitting Kou, 2014                  |  | 1.005 | [0.932; 1.084] |
| Omitting Kupcinskask, 2014          |  | 0.998 | [0.926; 1.076] |
| Omitting Kupcinskask, 2014          |  | 1.000 | [0.927; 1.078] |
| Omitting Li, 2016                   |  | 1.005 | [0.933; 1.083] |
| Omitting Li, 2016                   |  | 1.003 | [0.930; 1.081] |
| Omitting Li, 2015                   |  | 1.004 | [0.931; 1.083] |
| Omitting Li, 2015                   |  | 0.998 | [0.926; 1.077] |
| Omitting Li, 2014                   |  | 1.002 | [0.929; 1.081] |
| Omitting Li, 2010                   |  | 1.004 | [0.931; 1.083] |
| Omitting Linhares, 2012             |  | 0.998 | [0.926; 1.076] |
| Omitting Liu, 2015                  |  | 0.997 | [0.925; 1.073] |
| Omitting Liu, 2013                  |  | 0.999 | [0.926; 1.076] |
| Omitting Liu, 2010                  |  | 1.000 | [0.927; 1.079] |
| Omitting Lv, 2013                   |  | 0.991 | [0.925; 1.063] |
| Omitting Ma, 2013                   |  | 1.000 | [0.927; 1.078] |
| Omitting Martin-Guerrero, 2015      |  | 1.002 | [0.929; 1.081] |
| Omitting Mashayekhi, 2018           |  | 1.001 | [0.928; 1.079] |
| Omitting Miao, 2016                 |  | 1.004 | [0.931; 1.083] |
| Omitting Min, 2013                  |  | 1.006 | [0.933; 1.085] |
| Omitting Minh, 2018                 |  | 1.008 | [0.937; 1.085] |
| Omitting Mittal, 2011               |  | 0.998 | [0.926; 1.076] |
| Omitting Morales, 2016              |  | 1.002 | [0.929; 1.081] |
| Omitting Mulong Du, 2014            |  | 0.997 | [0.925; 1.075] |
| Omitting Ni, 2016                   |  | 1.002 | [0.929; 1.081] |
| Omitting Nikolic, 2015              |  | 1.003 | [0.930; 1.082] |
| Omitting Okubo, 2010                |  | 1.002 | [0.929; 1.081] |
| Omitting Omrani, 2014               |  | 1.005 | [0.932; 1.083] |
| Omitting Parlayan, 2014             |  | 1.003 | [0.929; 1.082] |
| Omitting Pavlakis, 2013             |  | 1.003 | [0.931; 1.082] |
| Omitting Peckham-Gregory, 2016      |  | 1.003 | [0.929; 1.081] |
| Omitting Peng, 2010                 |  | 1.006 | [0.933; 1.084] |
| Omitting Poltronieri-Oliveira, 2017 |  | 1.004 | [0.931; 1.083] |
| Omitting Pu, 2014                   |  | 1.004 | [0.931; 1.083] |
| Omitting Qi, 2015                   |  | 1.004 | [0.931; 1.083] |
| Omitting Qi, 2014                   |  | 0.998 | [0.926; 1.076] |
| Omitting Qi, 2010                   |  | 1.002 | [0.929; 1.080] |
| Omitting Qu, 2014                   |  | 1.001 | [0.928; 1.080] |
| Omitting Rakmanee, 2017             |  | 1.006 | [0.933; 1.084] |
| Omitting Rogoveanu, 2017            |  | 1.002 | [0.929; 1.081] |
| Omitting Roy, 2014                  |  | 0.999 | [0.927; 1.078] |
| Omitting Shen, 2016                 |  | 1.004 | [0.931; 1.083] |
| Omitting Sodhi, 2015                |  | 0.997 | [0.925; 1.075] |
| Omitting Song, 2016                 |  | 1.003 | [0.930; 1.082] |
| Omitting Srivastava, 2017           |  | 1.001 | [0.928; 1.079] |
| Omitting Srivastava, 2010           |  | 0.998 | [0.926; 1.077] |
| Omitting Su, 2016                   |  | 1.000 | [0.927; 1.079] |
| Omitting Sun, 2016                  |  | 1.005 | [0.932; 1.083] |
| Omitting Sushma, 2015               |  | 1.006 | [0.934; 1.083] |
| Omitting Tian, 2009                 |  | 1.004 | [0.931; 1.083] |
| Omitting Tong, 2014                 |  | 0.999 | [0.927; 1.078] |
| Omitting Toraih, 2016               |  | 0.998 | [0.926; 1.075] |
| Omitting Toraih, 2016               |  | 0.997 | [0.925; 1.074] |
| Omitting Umar, 2013                 |  | 1.000 | [0.927; 1.079] |
| Omitting Vinci, 2013                |  | 0.999 | [0.927; 1.077] |
| Omitting Vinci, 2011                |  | 0.999 | [0.927; 1.077] |
| Omitting Wang, 2016                 |  | 1.001 | [0.928; 1.079] |
| Omitting Wang, 2014                 |  | 1.000 | [0.927; 1.079] |
| Omitting Wang, 2013                 |  | 0.998 | [0.925; 1.076] |
| Omitting Wang, 2010                 |  | 1.003 | [0.930; 1.082] |
| Omitting Wei, 2013                  |  | 0.998 | [0.925; 1.076] |
| Omitting Yan, 2015                  |  | 1.007 | [0.934; 1.085] |
| Omitting Yang, 2008                 |  | 1.002 | [0.928; 1.081] |
| Omitting Yin, 2017                  |  | 1.002 | [0.929; 1.081] |
| Omitting Yin, 2016                  |  | 1.001 | [0.928; 1.080] |
| Omitting Yin, 2015                  |  | 1.000 | [0.928; 1.079] |
| Omitting Zhan, 2011                 |  | 1.004 | [0.931; 1.083] |
| Omitting Zhang, 2017                |  | 0.999 | [0.926; 1.077] |
| Omitting Zhang, 2016                |  | 1.002 | [0.929; 1.080] |
| Omitting Zhang, 2013                |  | 1.005 | [0.932; 1.084] |
| Omitting Zhang, 2012                |  | 1.000 | [0.928; 1.078] |
| Omitting Zhao, 2016                 |  | 1.004 | [0.931; 1.082] |
| Omitting Zhou, 2014                 |  | 1.006 | [0.934; 1.085] |
| Omitting Zhou, 2011                 |  | 1.003 | [0.930; 1.081] |
| Omitting Zhu, 2012                  |  | 1.003 | [0.930; 1.082] |
| Omitting Kim, 2010                  |  | 1.004 | [0.931; 1.083] |

Random effects model 1.002 [0.930; 1.080]

C)

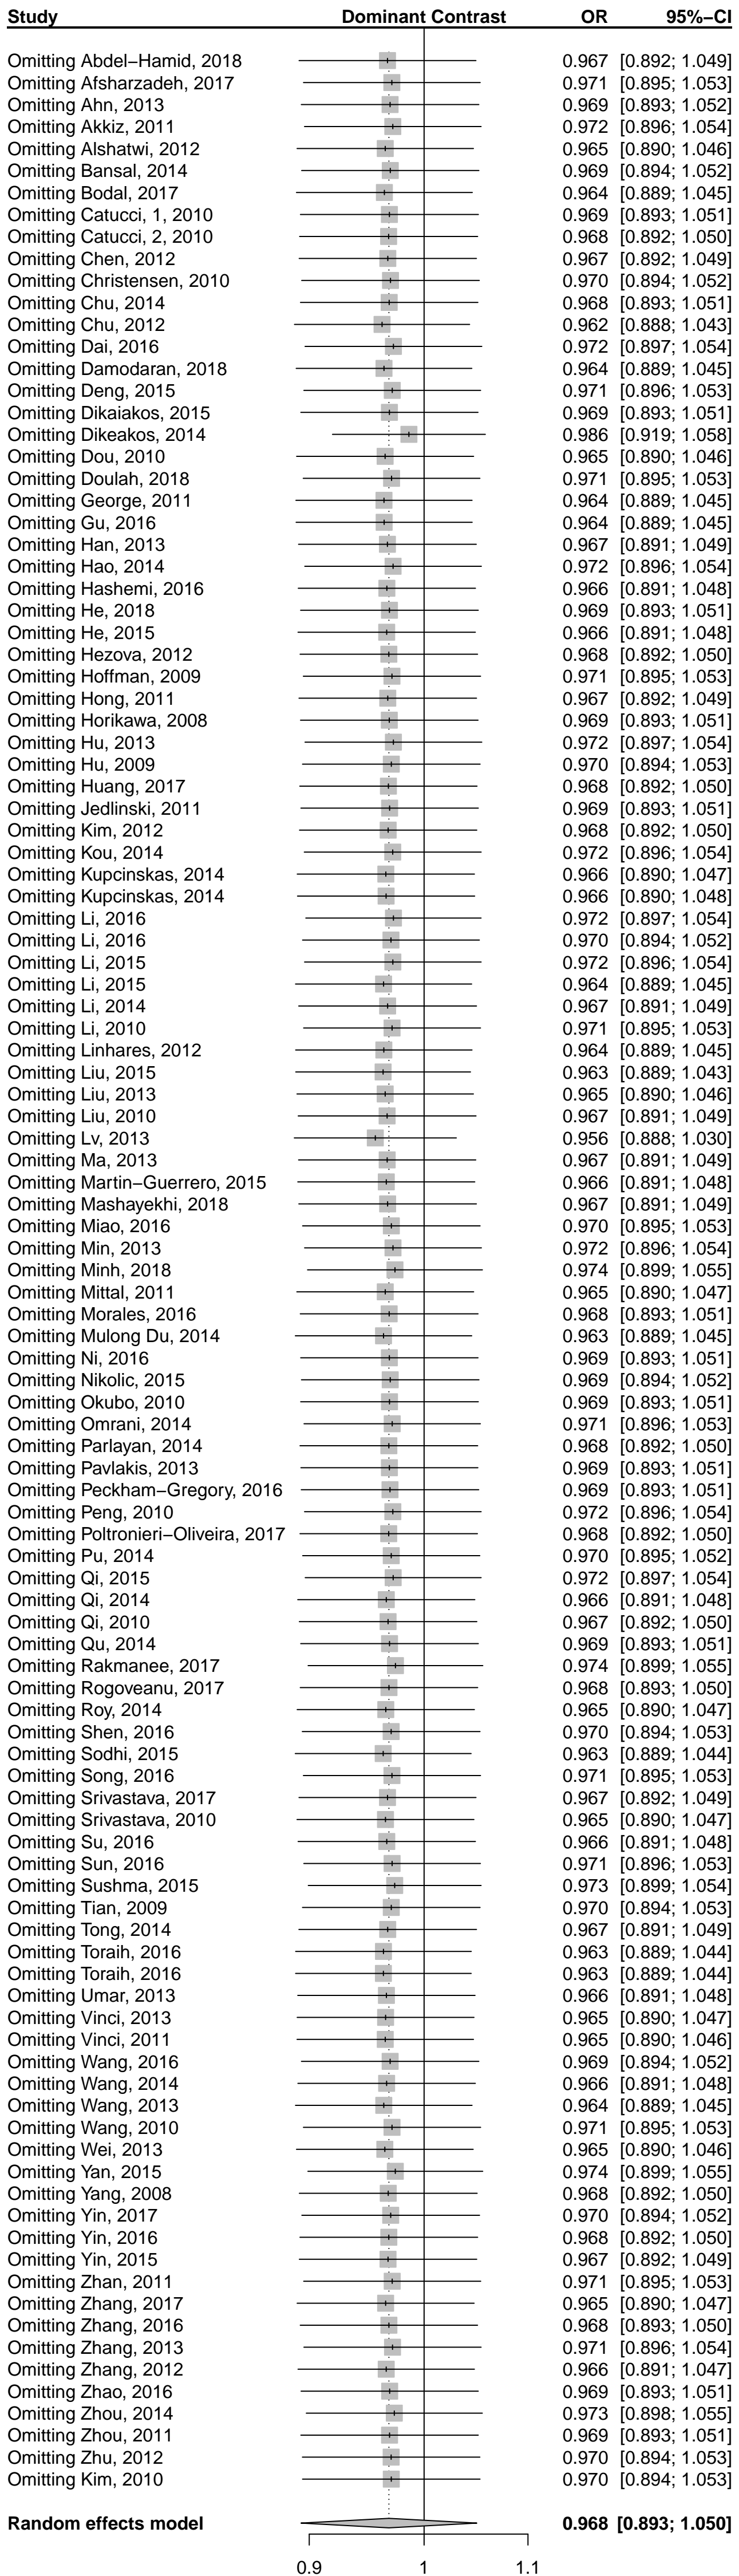

D)

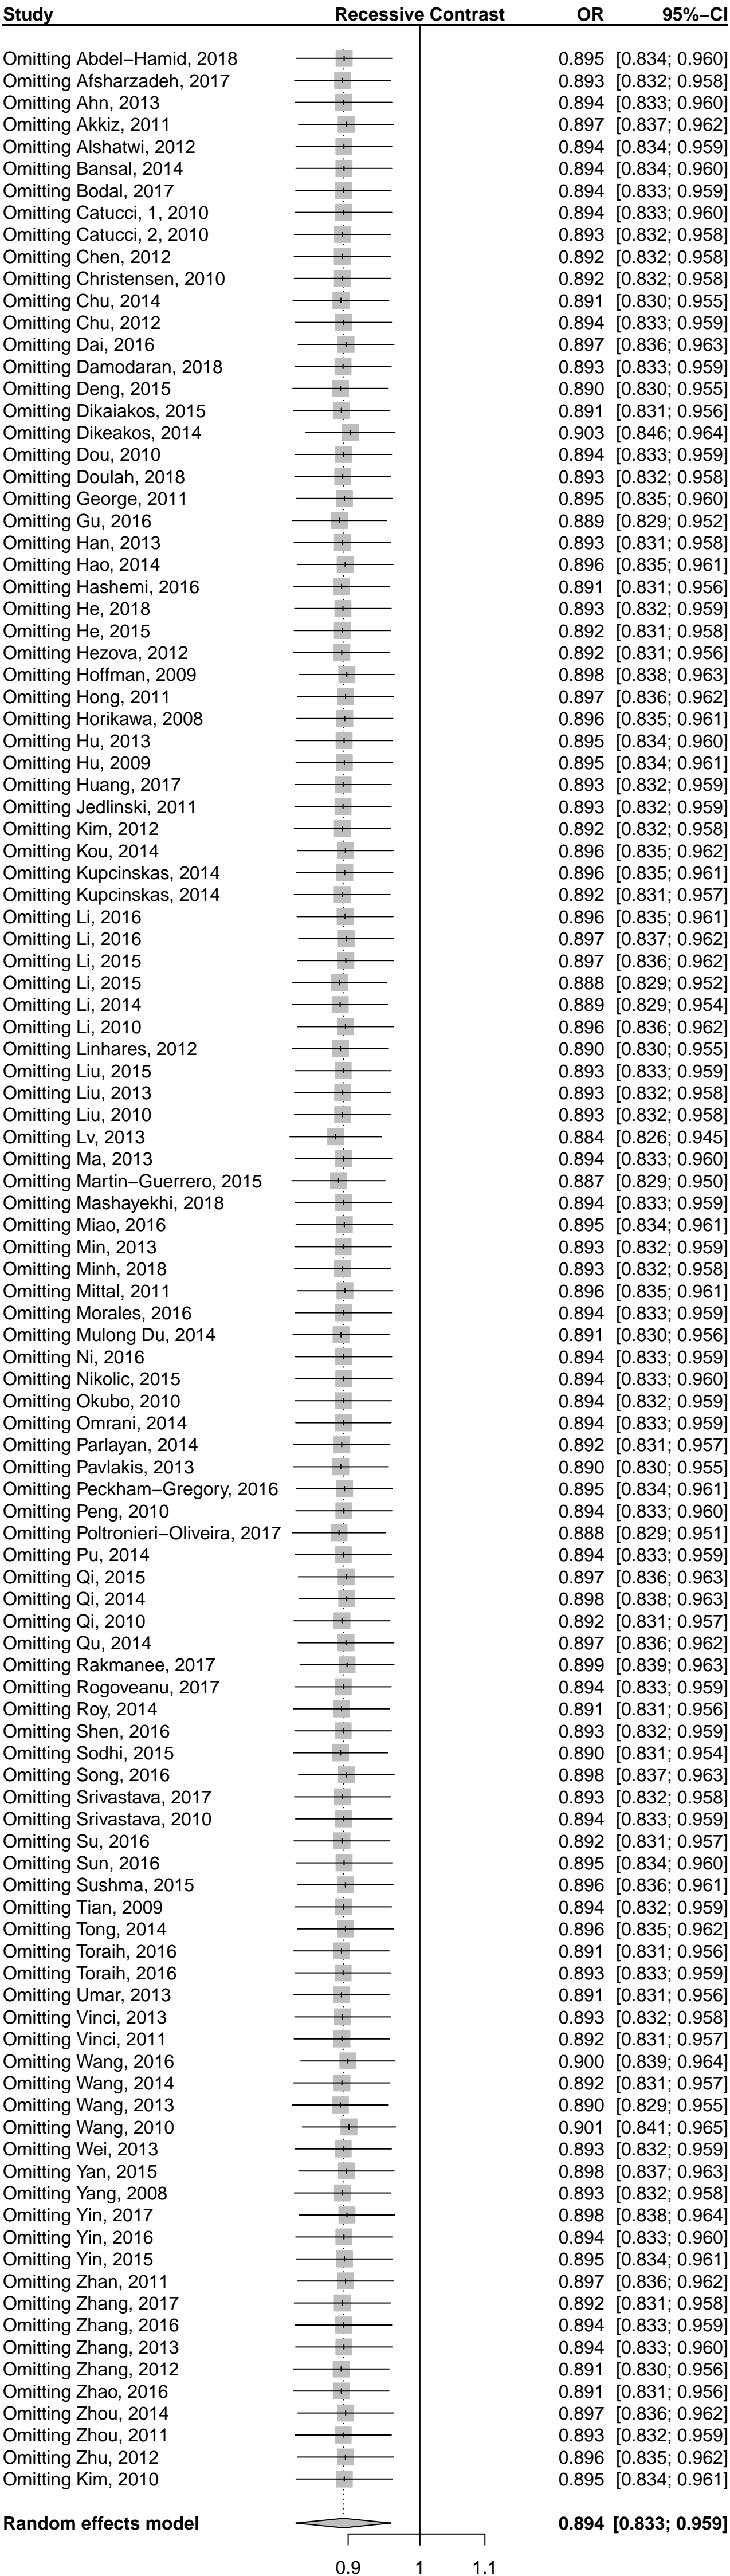

E)

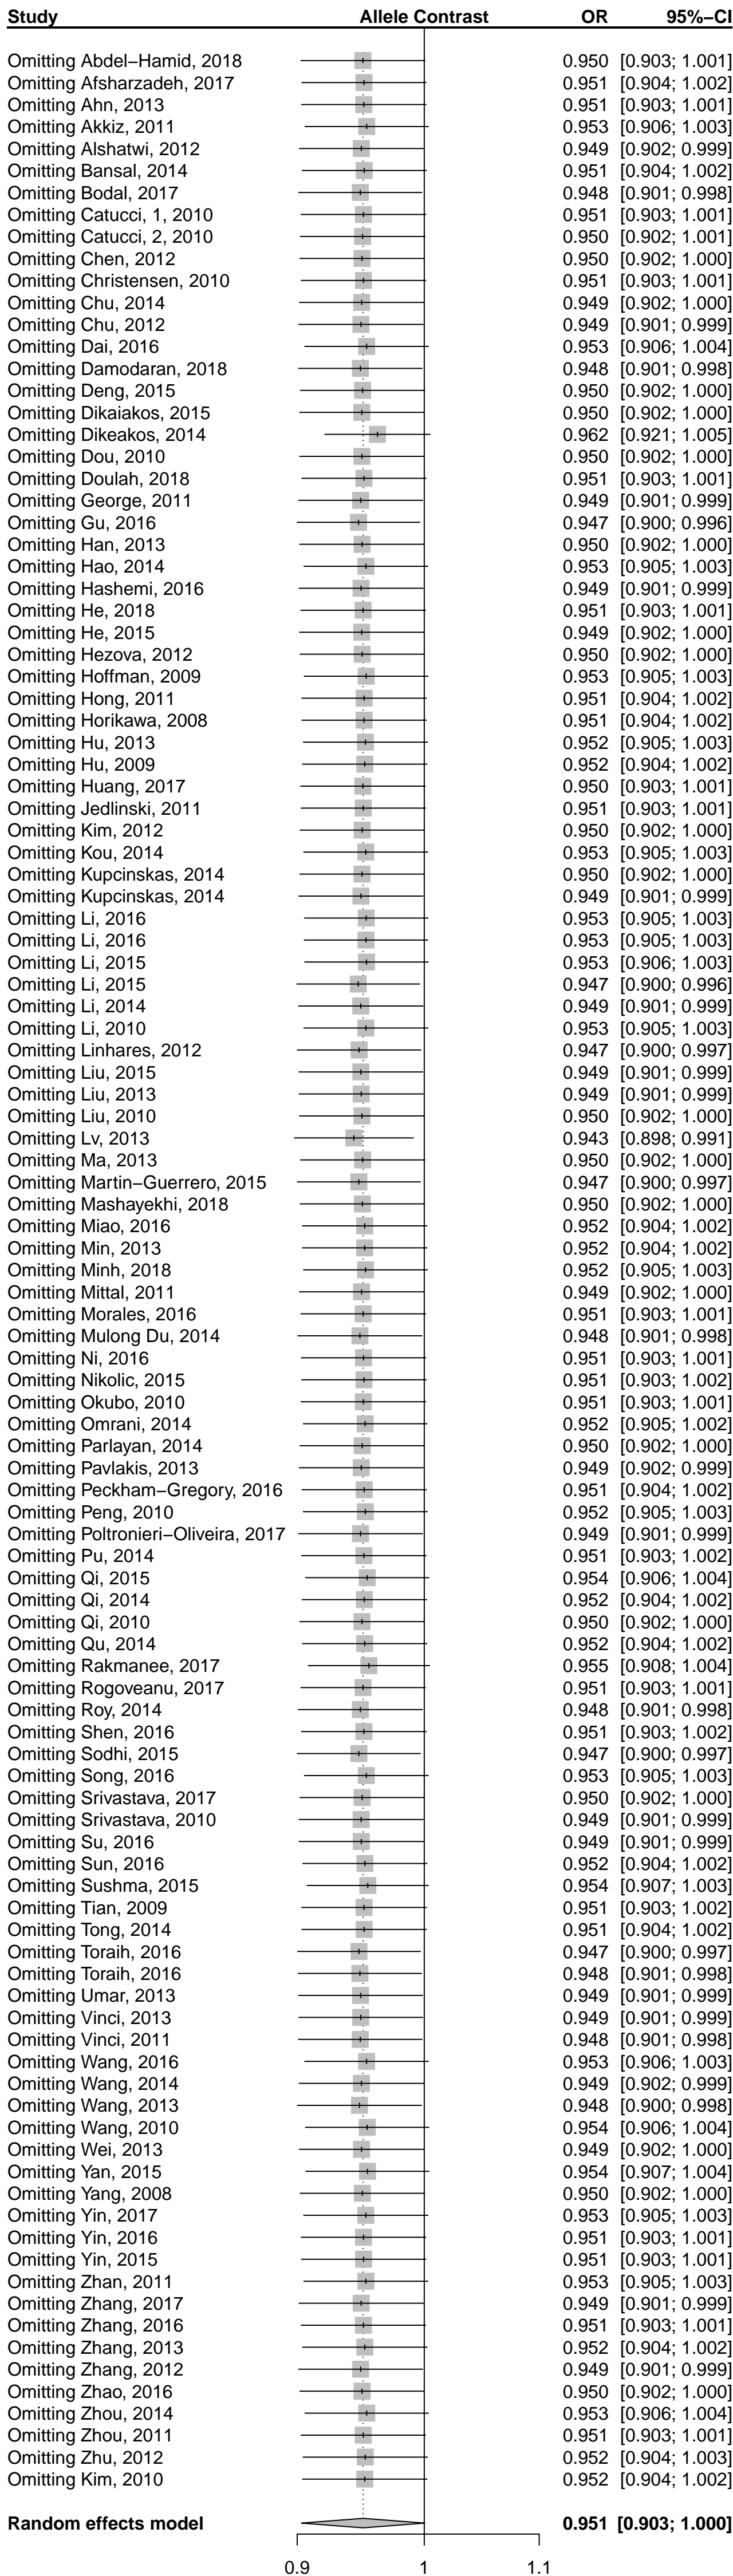

Supplement: Supplementary file 2 [file 14617067]
