# Supplementary material
Source: publisher figshare collection journal article supplement (https://frontiersin.figshare.com/ndownloader/files/14617067)

**Supplementary Figure S4.** Forest plots for association of miR-149 rs2292832 and cancer risk under different genetic models. **A)** Homozygote comparison with trim & fill approach; **B)** Homozygote comparison using original studies; **C)** Heterozygote comparison; **D)** Dominant comparison; **E)** Recessive comparison with “trim & fill” approach; **F)** Recessive comparison using original studies; **G)** Allele contrast with “trim & fill” approach; **H)** Allele contrast using original studies

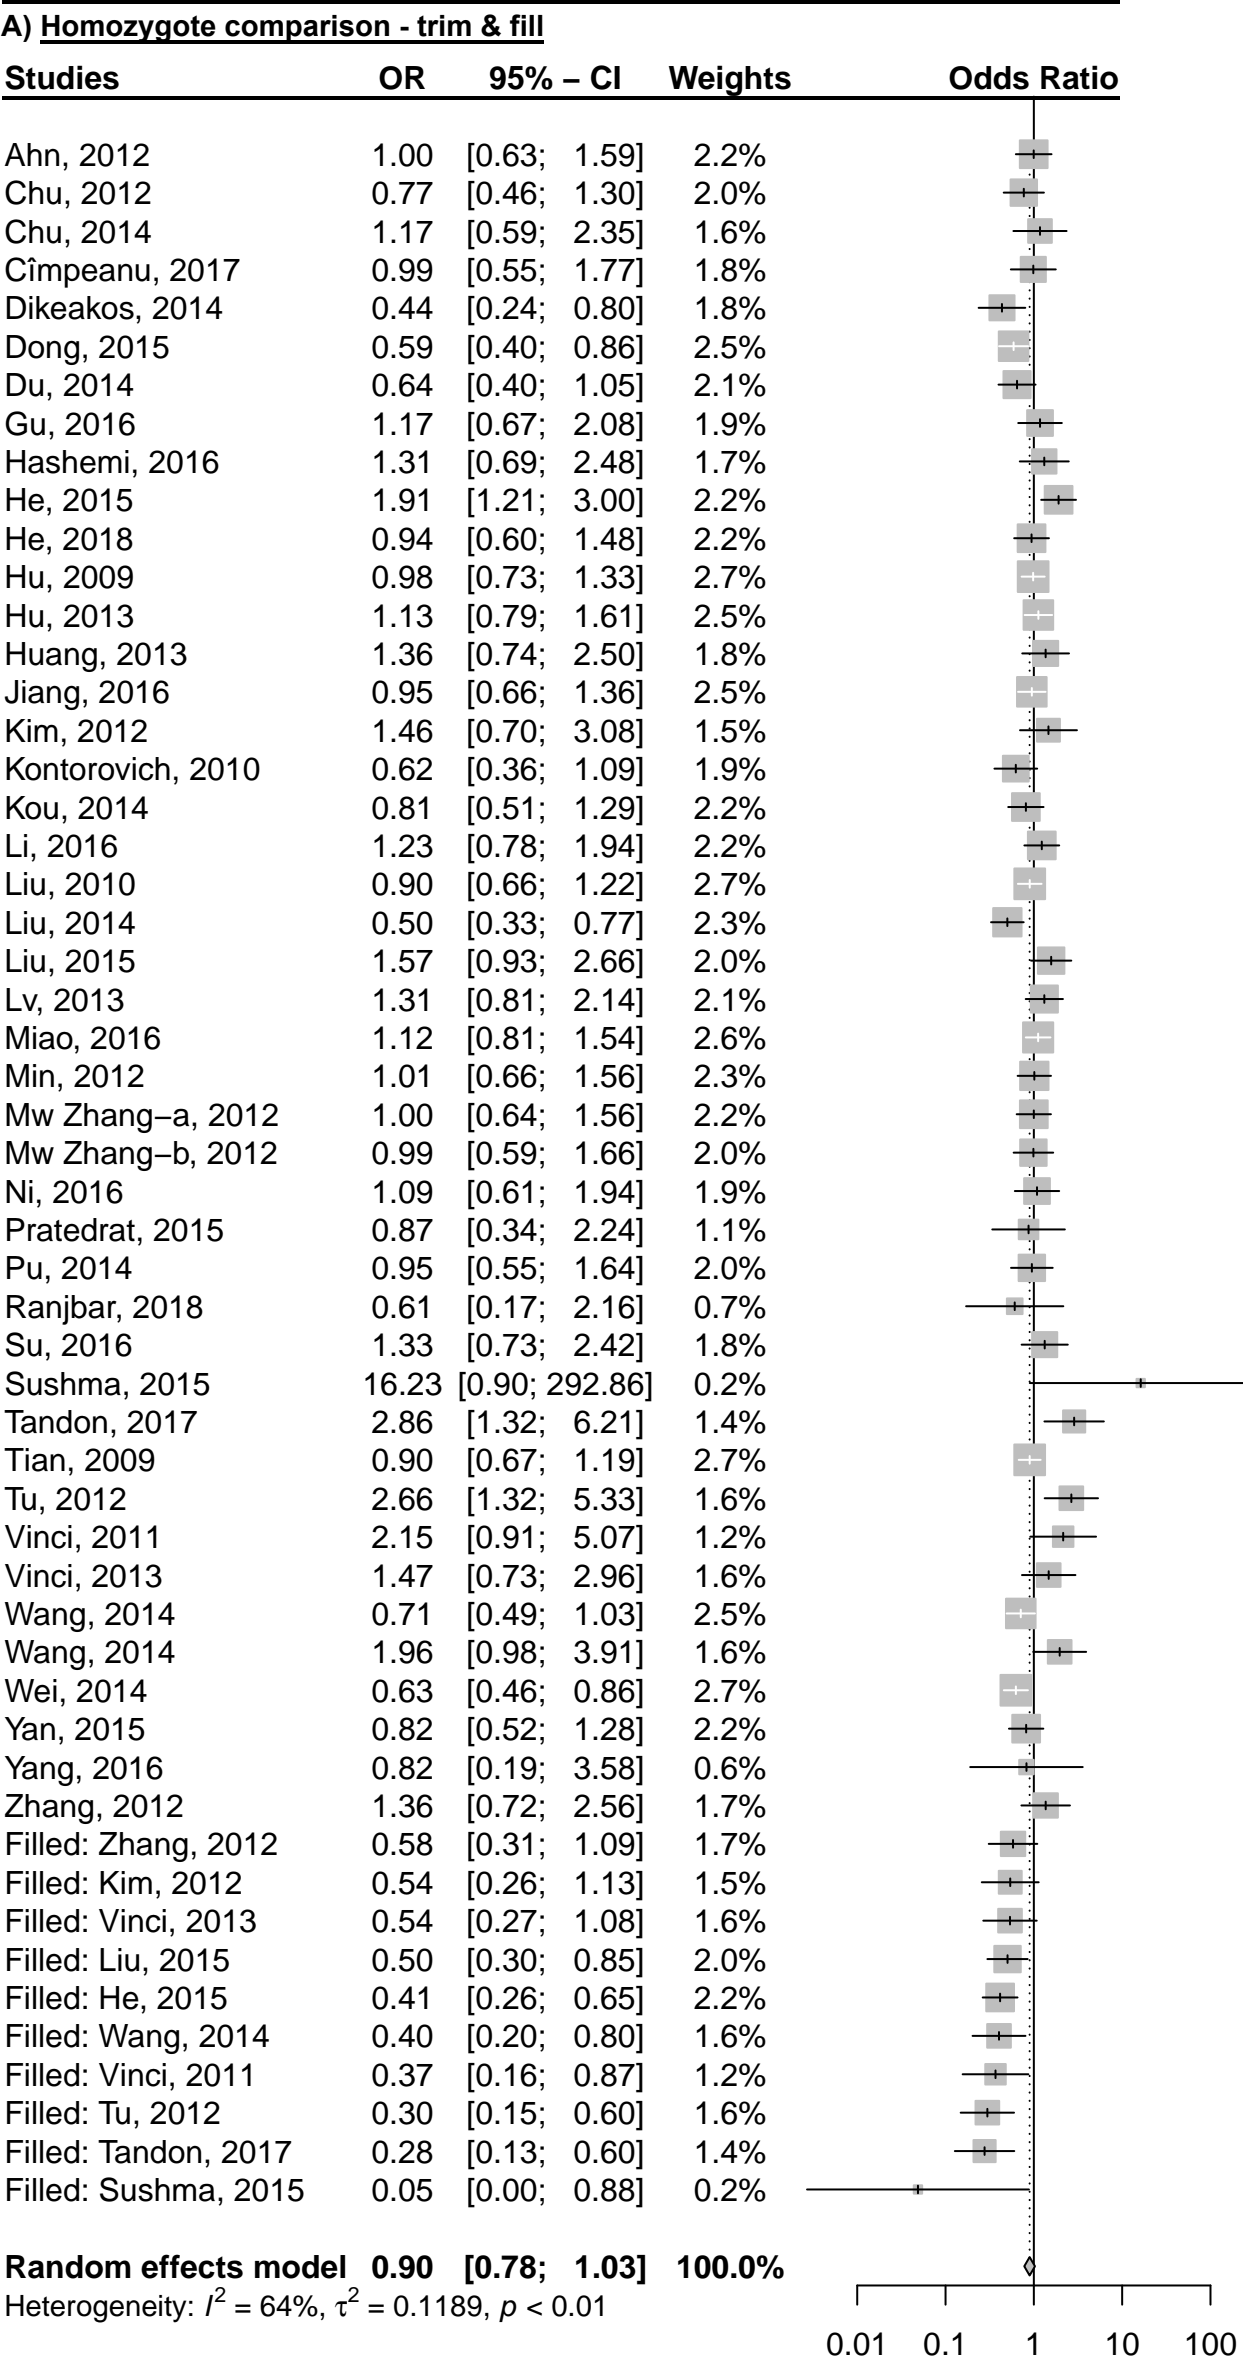

B) Homozygote comparison using original studies

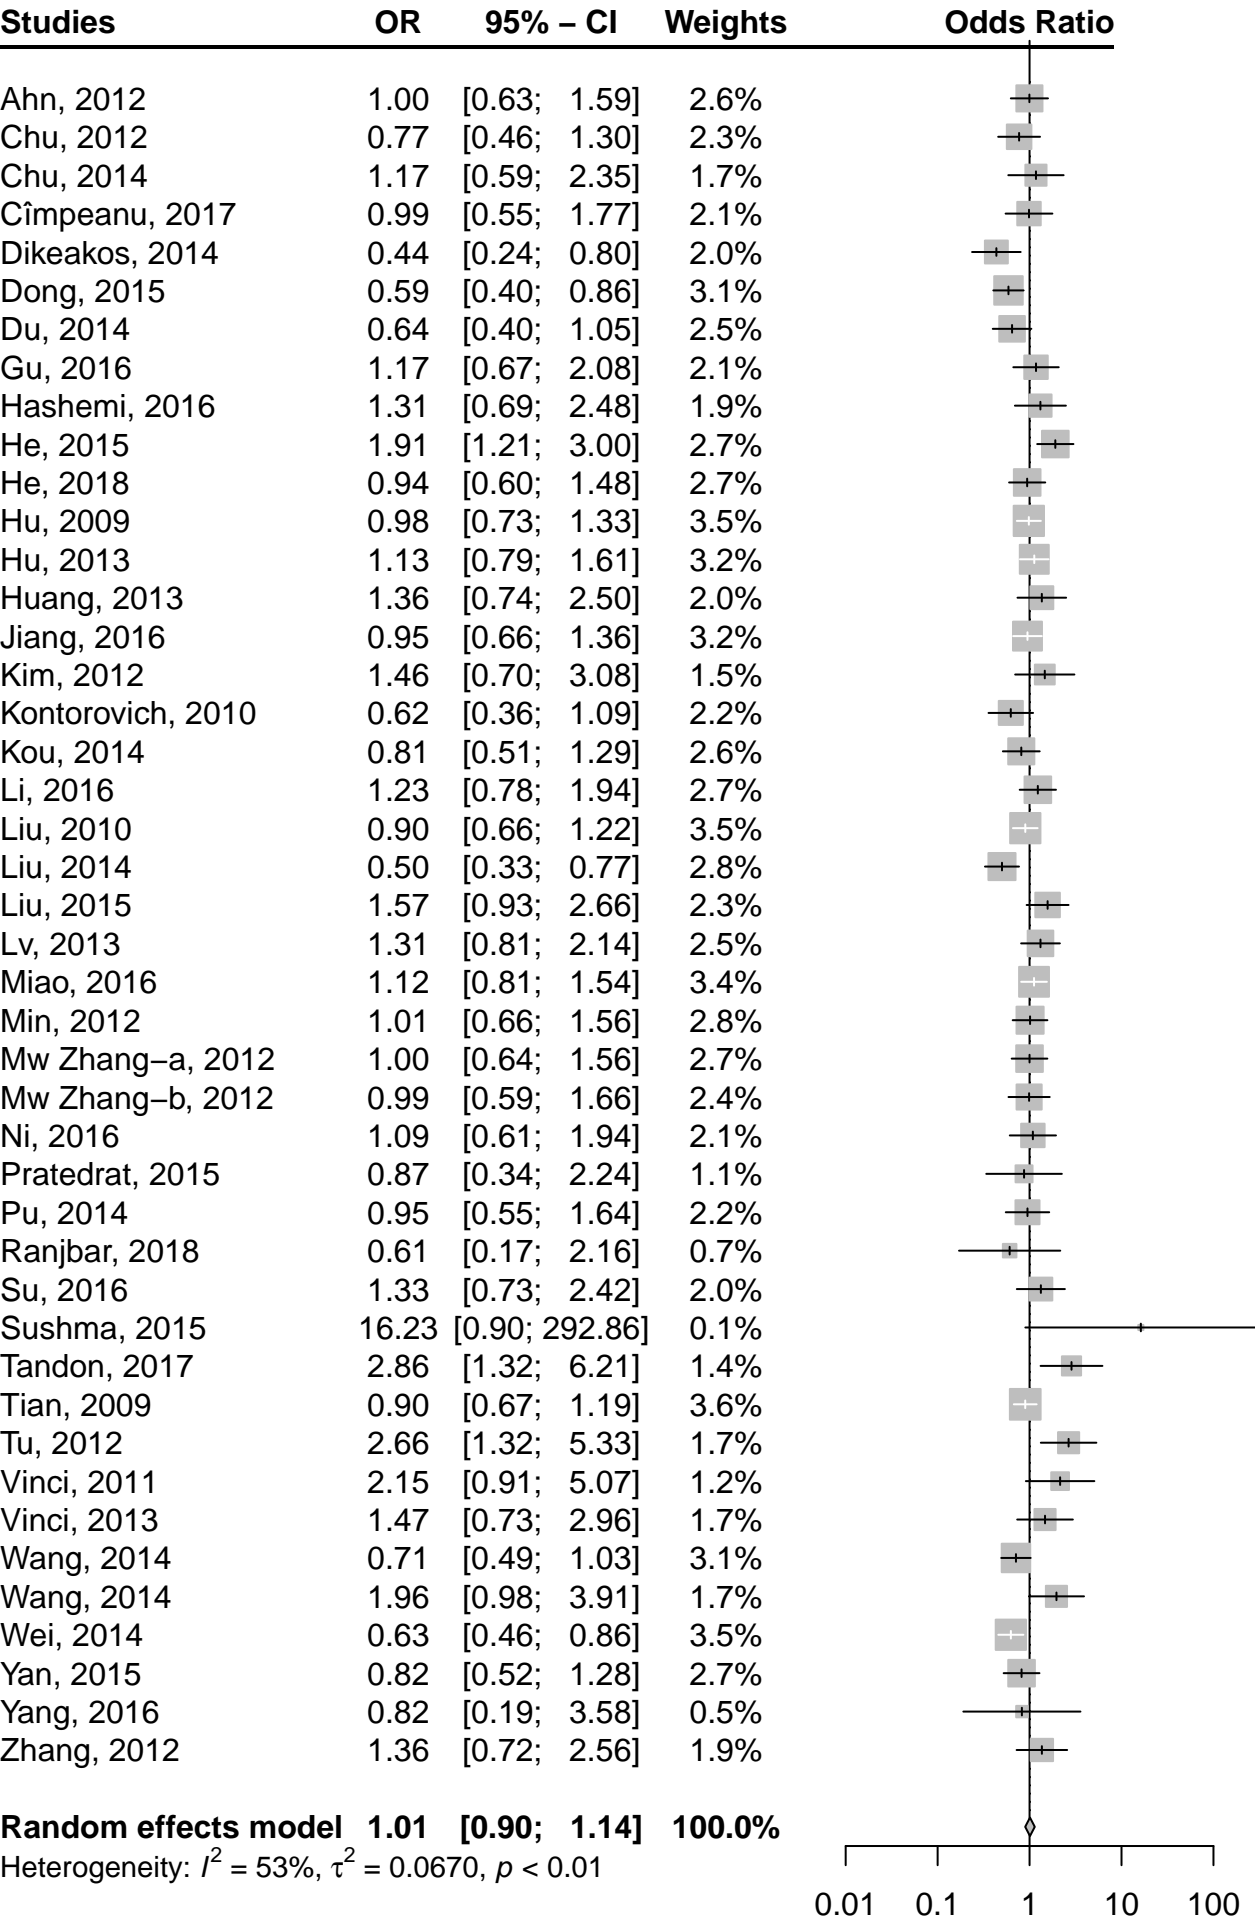

C) Heterozygote comparison

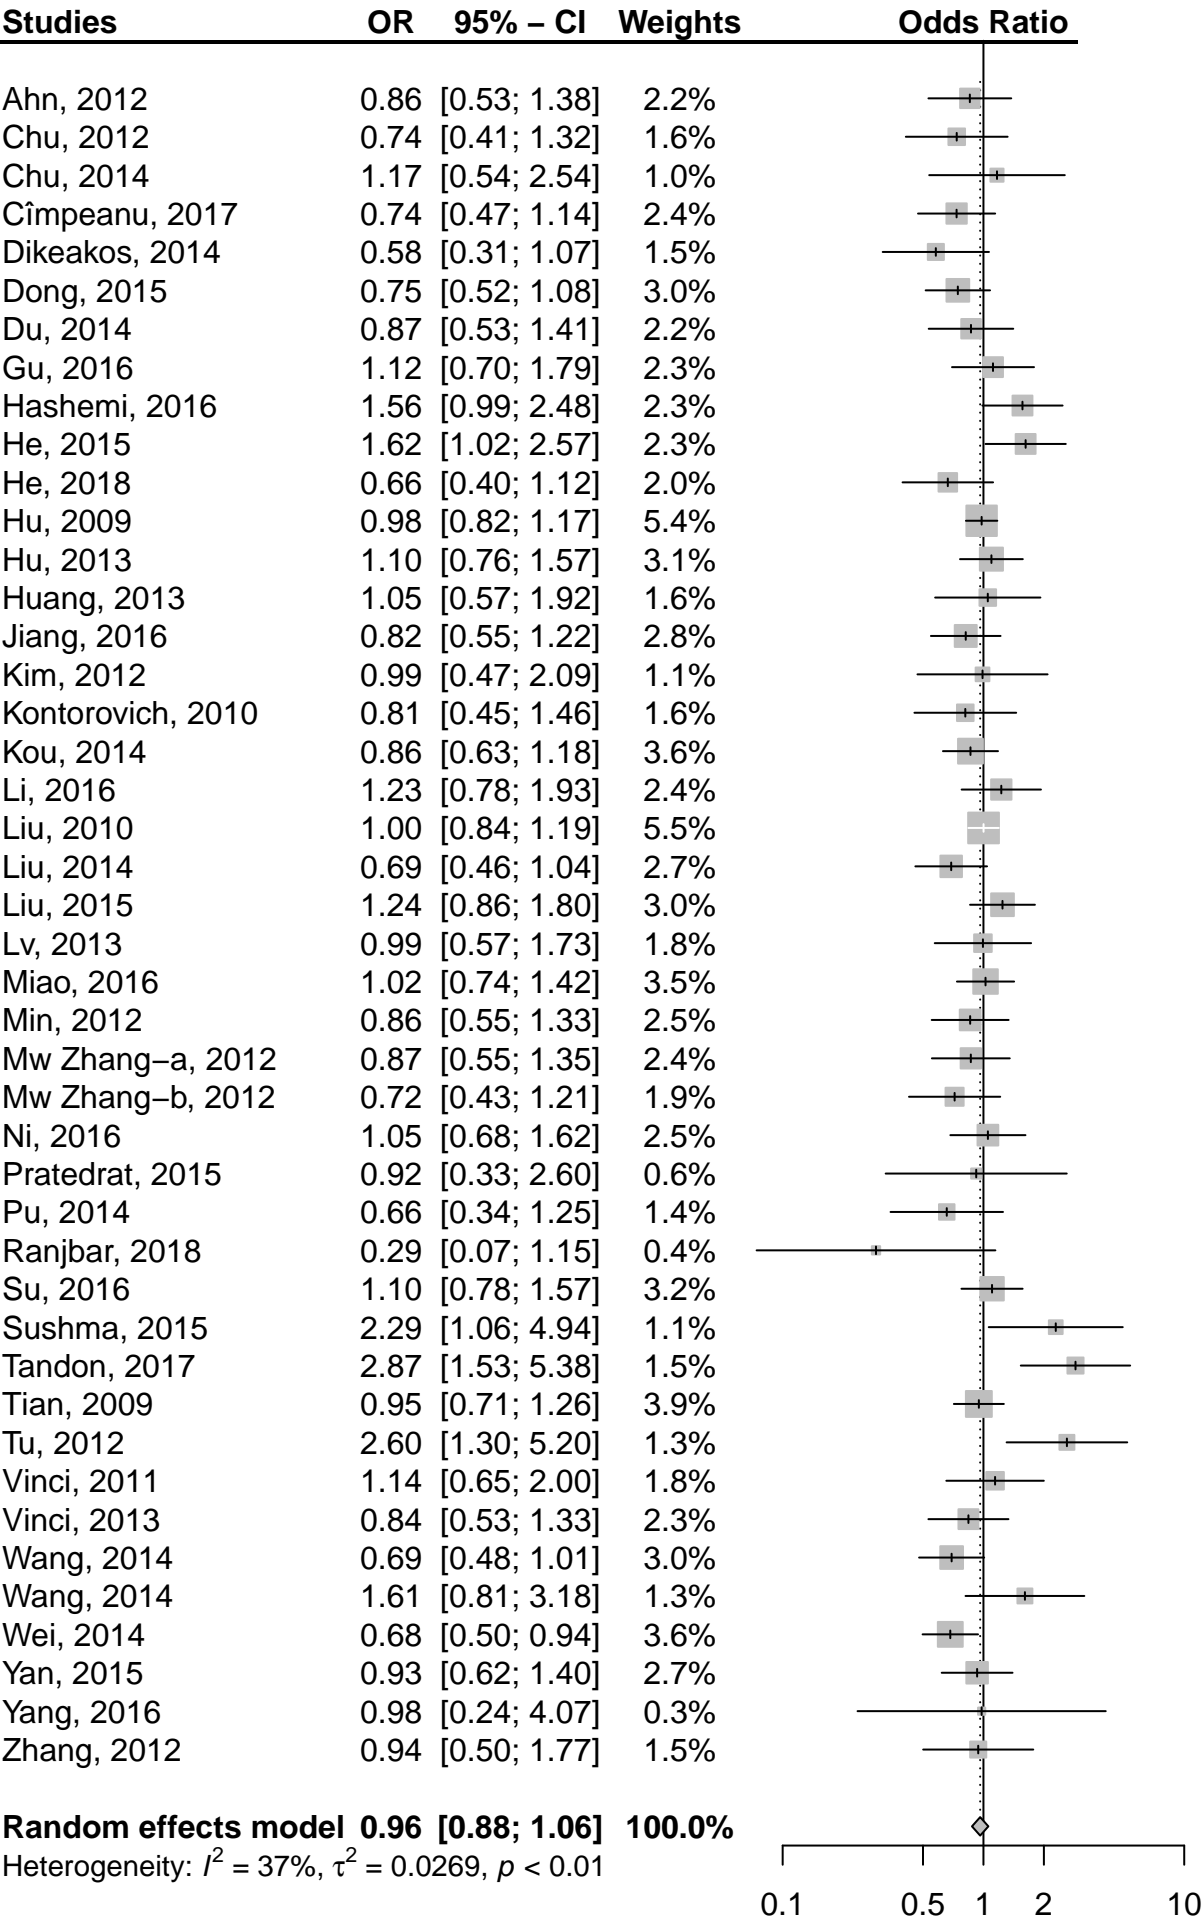

D) Dominant model

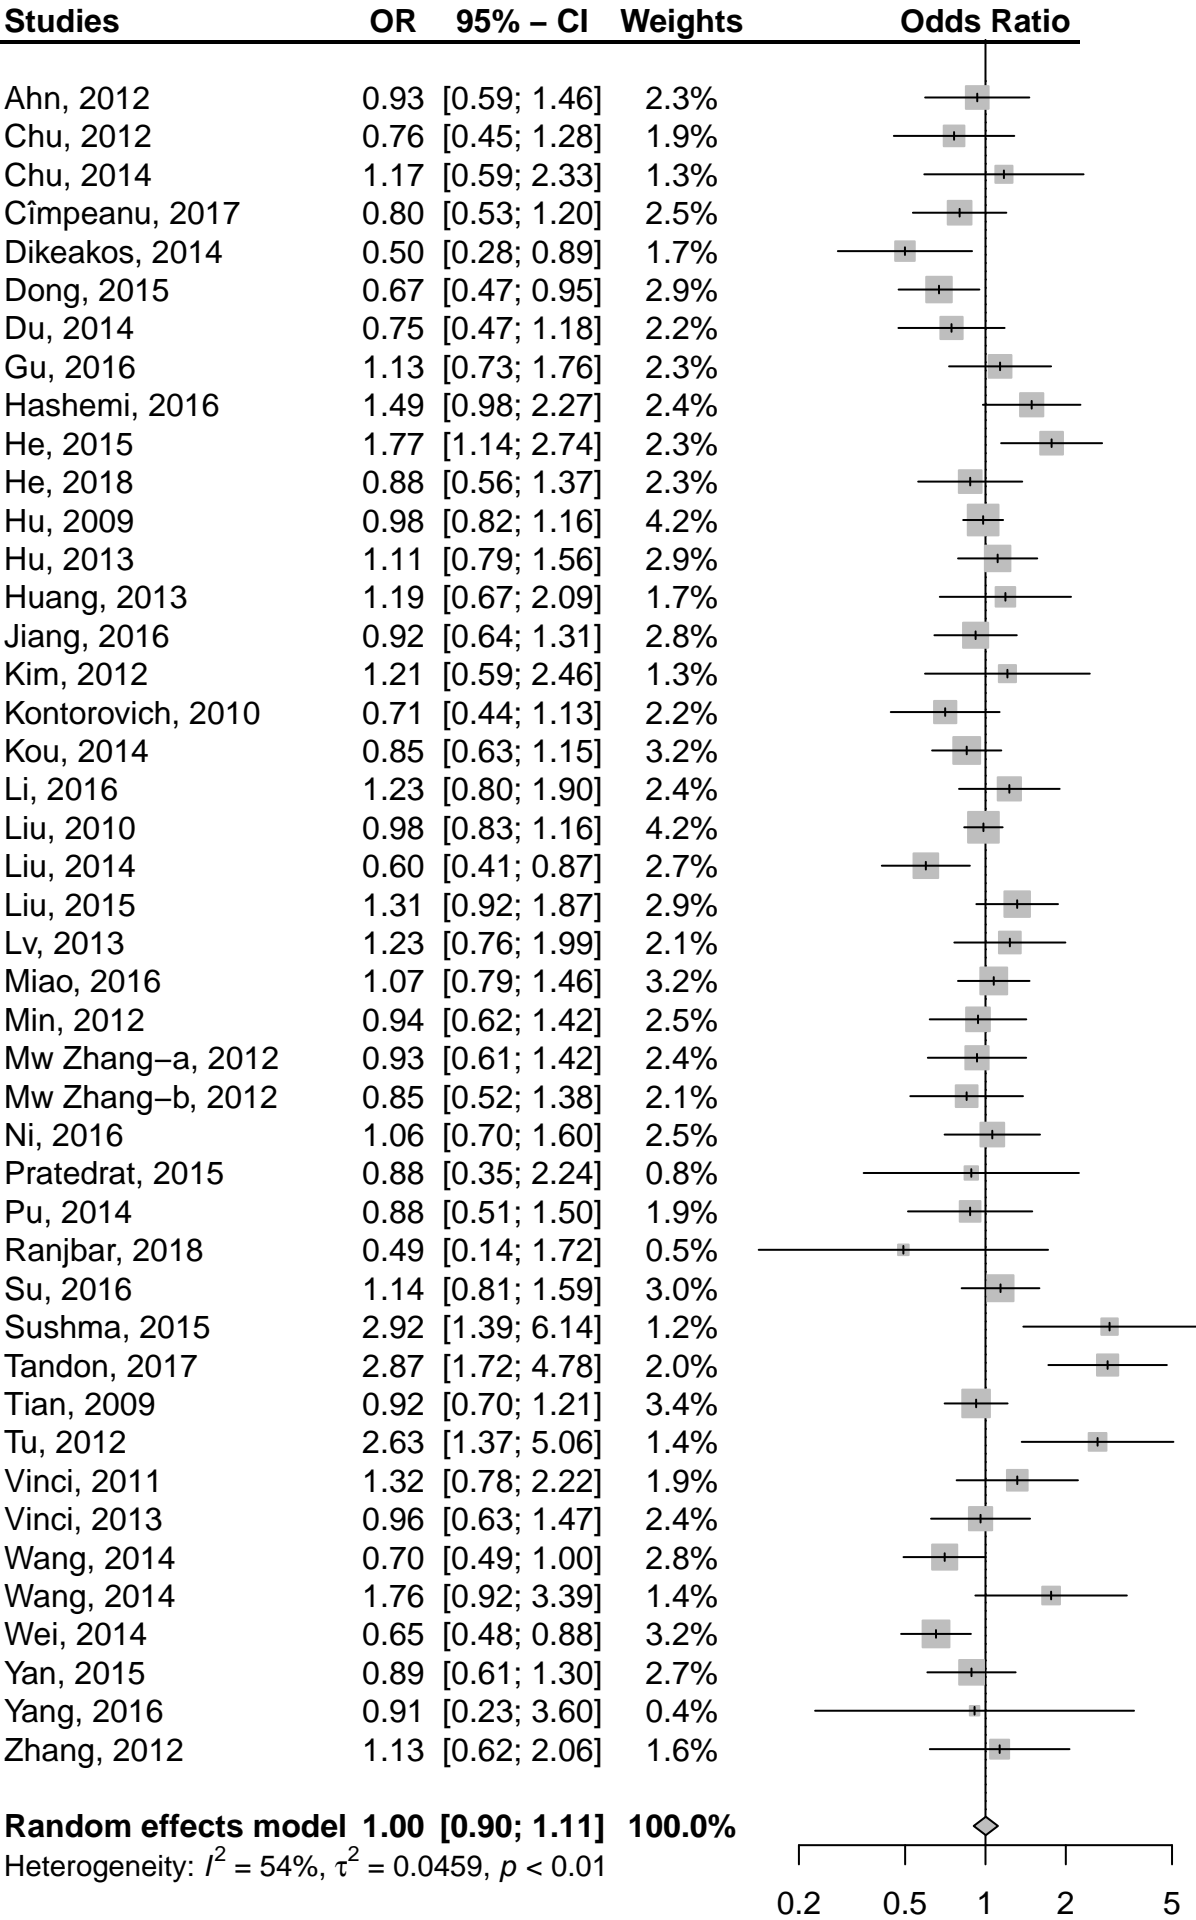

E) Recessive model - trim & fill

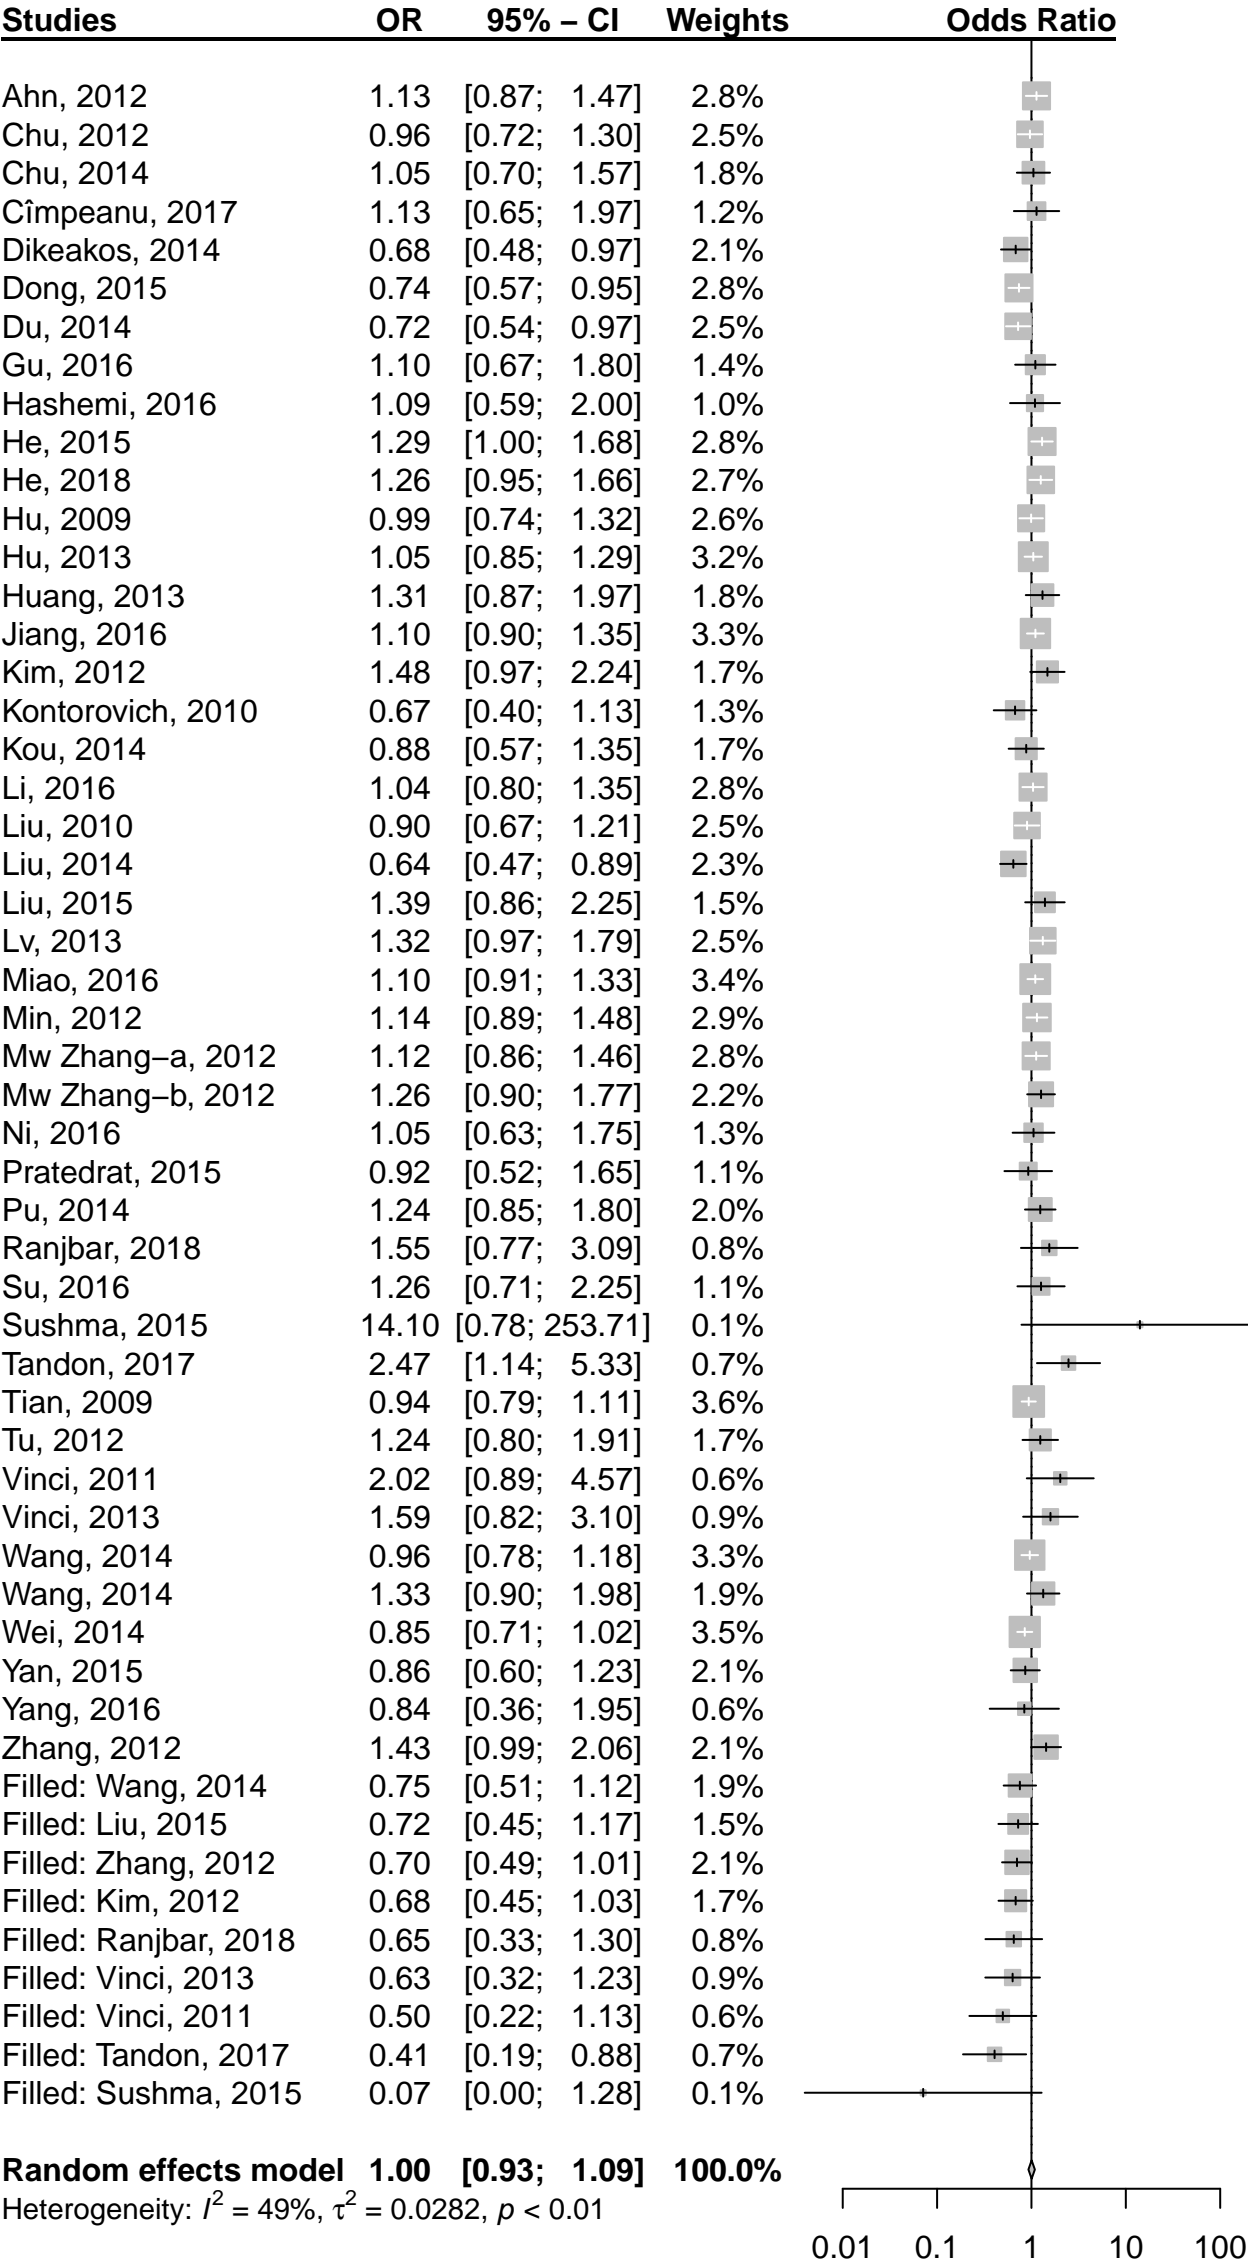

F) Recessive model using original studies

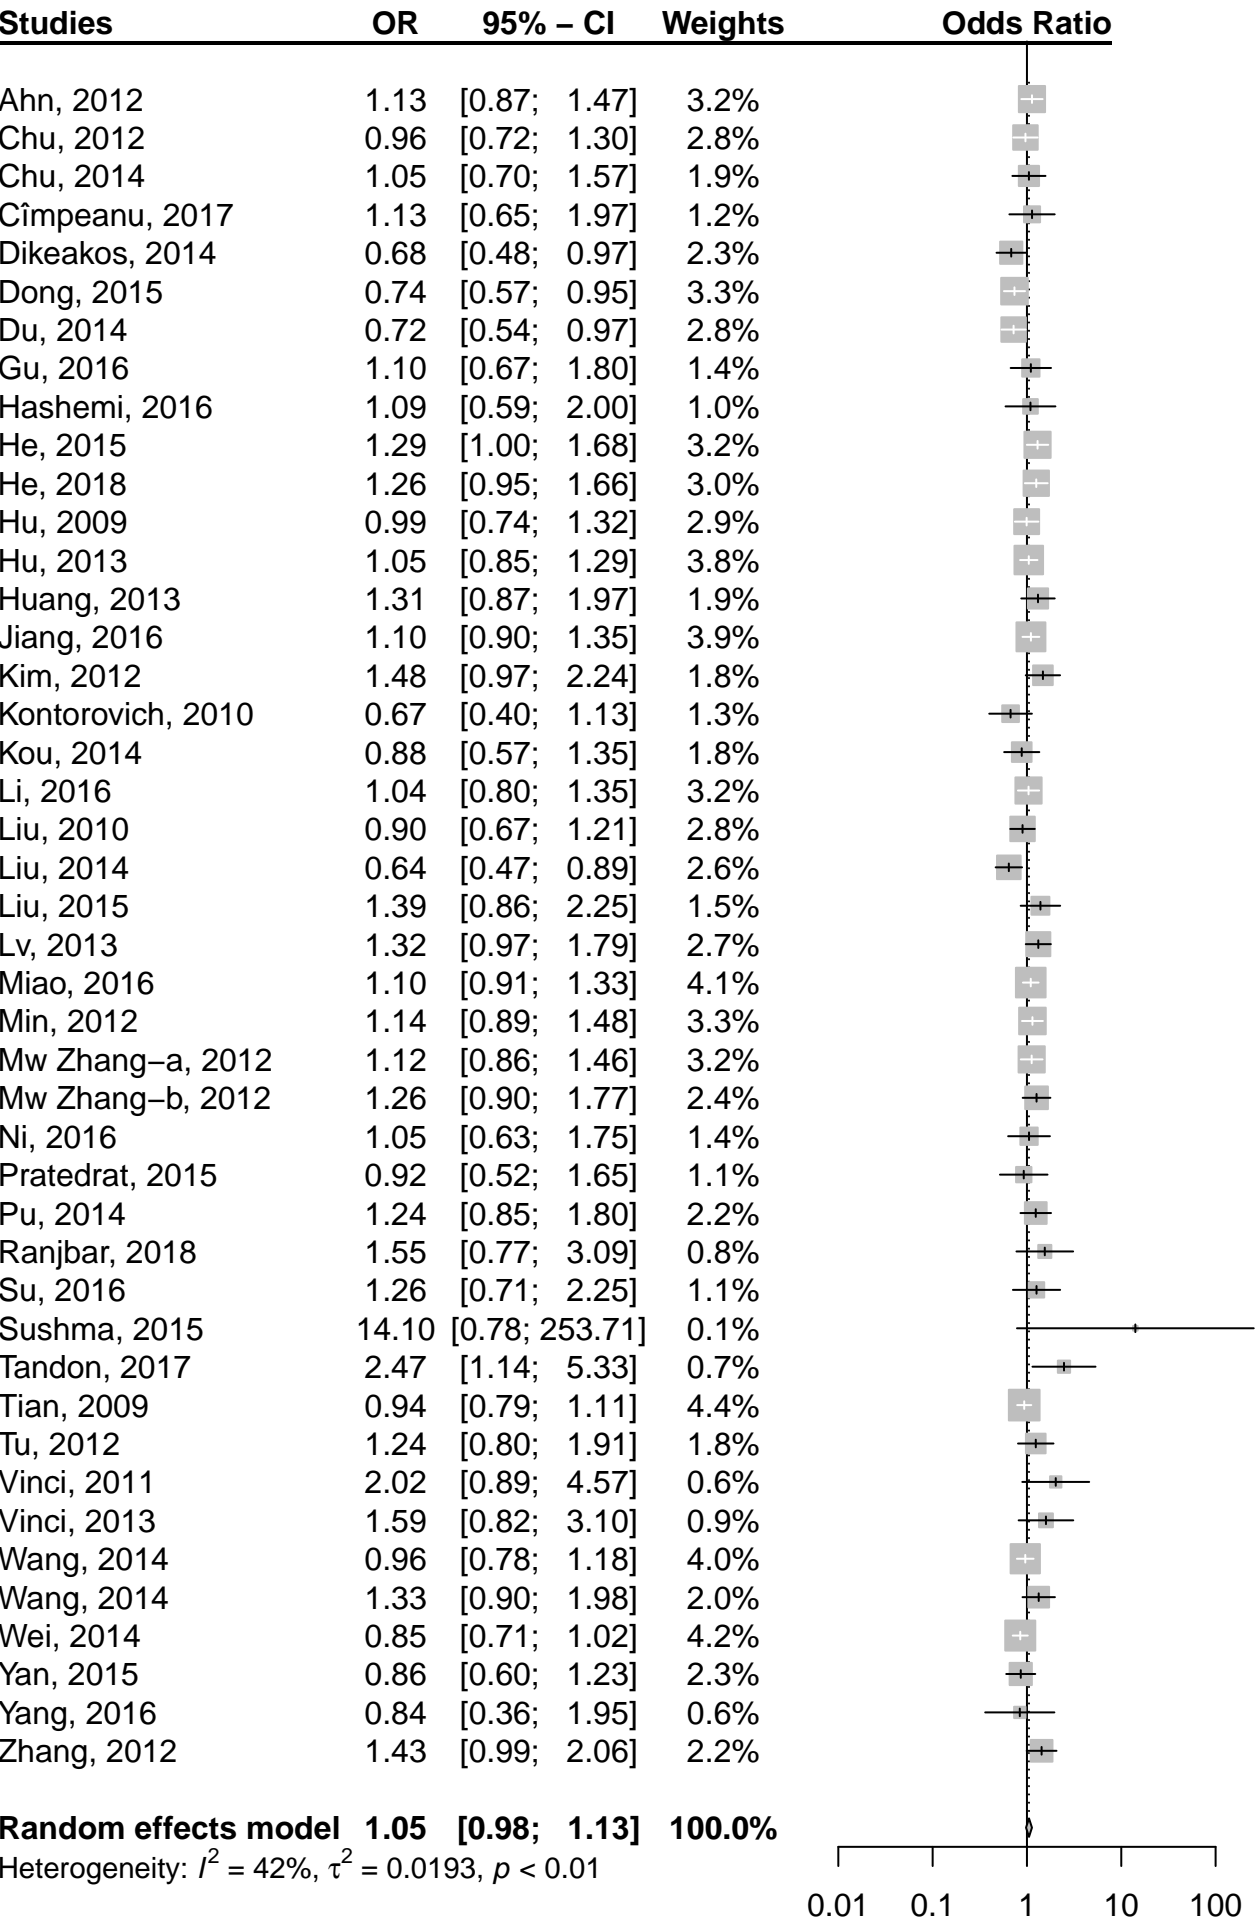

G) Allele contrast - trim & fill

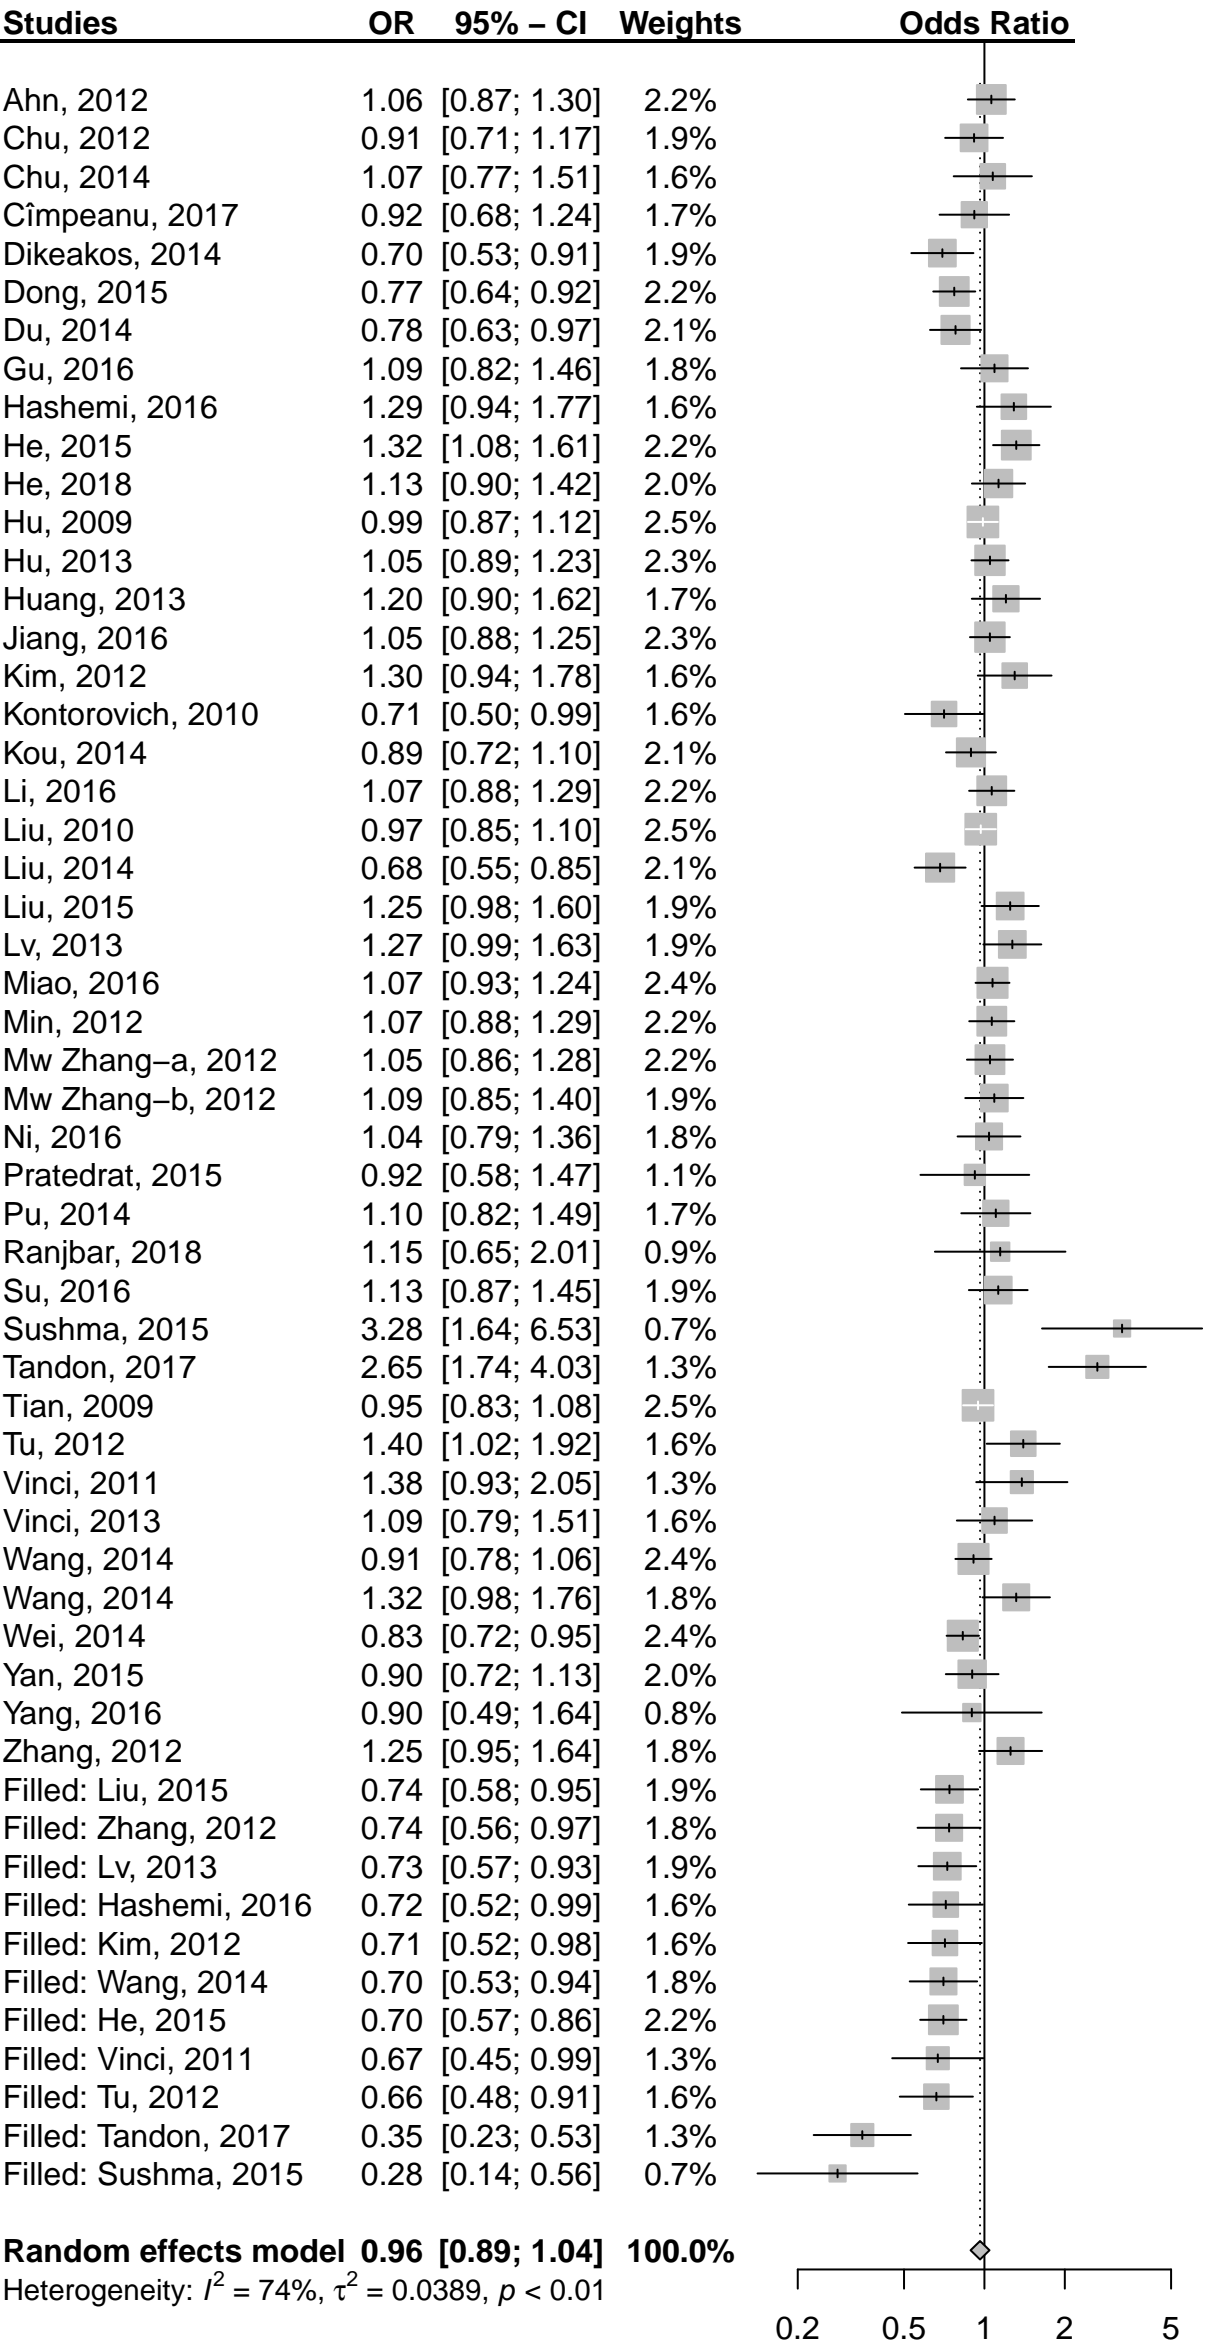

H) Allele contrast using original studies

Studies OR 95% – CI Weights Odds Ratio

|                   |      |              |      |  |
|-------------------|------|--------------|------|--|
| Ahn, 2012         | 1.06 | [0.87; 1.30] | 2.7% |  |
| Chu, 2012         | 0.91 | [0.71; 1.17] | 2.3% |  |
| Chu, 2014         | 1.07 | [0.77; 1.51] | 1.7% |  |
| Cîmpeanu, 2017    | 0.92 | [0.68; 1.24] | 2.0% |  |
| Dikeakos, 2014    | 0.70 | [0.53; 0.91] | 2.2% |  |
| Dong, 2015        | 0.77 | [0.64; 0.92] | 2.9% |  |
| Du, 2014          | 0.78 | [0.63; 0.97] | 2.6% |  |
| Gu, 2016          | 1.09 | [0.82; 1.46] | 2.0% |  |
| Hashemi, 2016     | 1.29 | [0.94; 1.77] | 1.8% |  |
| He, 2015          | 1.32 | [1.08; 1.61] | 2.7% |  |
| He, 2018          | 1.13 | [0.90; 1.42] | 2.5% |  |
| Hu, 2009          | 0.99 | [0.87; 1.12] | 3.3% |  |
| Hu, 2013          | 1.05 | [0.89; 1.23] | 3.1% |  |
| Huang, 2013       | 1.20 | [0.90; 1.62] | 2.0% |  |
| Jiang, 2016       | 1.05 | [0.88; 1.25] | 3.0% |  |
| Kim, 2012         | 1.30 | [0.94; 1.78] | 1.8% |  |
| Kontorovich, 2010 | 0.71 | [0.50; 0.99] | 1.7% |  |
| Kou, 2014         | 0.89 | [0.72; 1.10] | 2.6% |  |
| Li, 2016          | 1.07 | [0.88; 1.29] | 2.8% |  |
| Liu, 2010         | 0.97 | [0.85; 1.10] | 3.3% |  |
| Liu, 2014         | 0.68 | [0.55; 0.85] | 2.6% |  |
| Liu, 2015         | 1.25 | [0.98; 1.60] | 2.3% |  |
| Lv, 2013          | 1.27 | [0.99; 1.63] | 2.3% |  |
| Miao, 2016        | 1.07 | [0.93; 1.24] | 3.2% |  |
| Min, 2012         | 1.07 | [0.88; 1.29] | 2.8% |  |
| Mw Zhang–a, 2012  | 1.05 | [0.86; 1.28] | 2.7% |  |
| Mw Zhang–b, 2012  | 1.09 | [0.85; 1.40] | 2.3% |  |
| Ni, 2016          | 1.04 | [0.79; 1.36] | 2.2% |  |
| Pratedrat, 2015   | 0.92 | [0.58; 1.47] | 1.1% |  |
| Pu, 2014          | 1.10 | [0.82; 1.49] | 2.0% |  |
| Ranjbar, 2018     | 1.15 | [0.65; 2.01] | 0.9% |  |
| Su, 2016          | 1.13 | [0.87; 1.45] | 2.3% |  |
| Sushma, 2015      | 3.28 | [1.64; 6.53] | 0.6% |  |
| Tandon, 2017      | 2.65 | [1.74; 4.03] | 1.3% |  |
| Tian, 2009        | 0.95 | [0.83; 1.08] | 3.3% |  |
| Tu, 2012          | 1.40 | [1.02; 1.92] | 1.9% |  |
| Vinci, 2011       | 1.38 | [0.93; 2.05] | 1.4% |  |
| Vinci, 2013       | 1.09 | [0.79; 1.51] | 1.8% |  |
| Wang, 2014        | 0.91 | [0.78; 1.06] | 3.1% |  |
| Wang, 2014        | 1.32 | [0.98; 1.76] | 2.0% |  |
| Wei, 2014         | 0.83 | [0.72; 0.95] | 3.3% |  |
| Yan, 2015         | 0.90 | [0.72; 1.13] | 2.5% |  |
| Yang, 2016        | 0.90 | [0.49; 1.64] | 0.8% |  |
| Zhang, 2012       | 1.25 | [0.95; 1.64] | 2.2% |  |

Random effects model 1.04 [0.97; 1.12] 100.0%  
Heterogeneity:  $I^2 = 64\%$ ,  $\tau^2 = 0.0227$ ,  $p < 0.01$

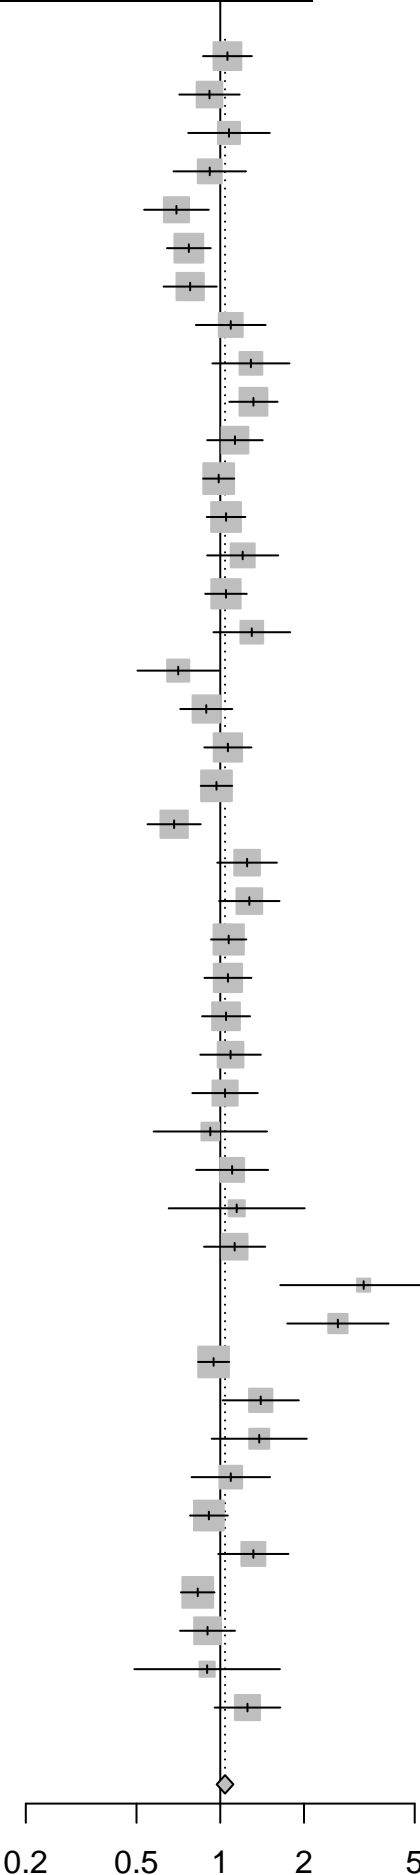

Supplement: Supplementary file 4 [file 14617067]
