# Supplementary material
Source: publisher figshare collection journal article supplement (https://frontiersin.figshare.com/ndownloader/files/14617067)

**Supplementary Figure S6.** Forest plots for meta-analysis of miR-149 rs2292832 sub-grouped according to cancer types. **A)** Homozygote comparison; **B)** Heterozygote comparison; **C)** Dominant comparison; **D)** Recessive comparison; **E)** Allele contrast.  
**Abbreviations:** BC: Breast cancer; HCC: Hepatocellular cancers; GC: Gastric cancer; CRC: Colorectal cancer; LC: Lung cancer

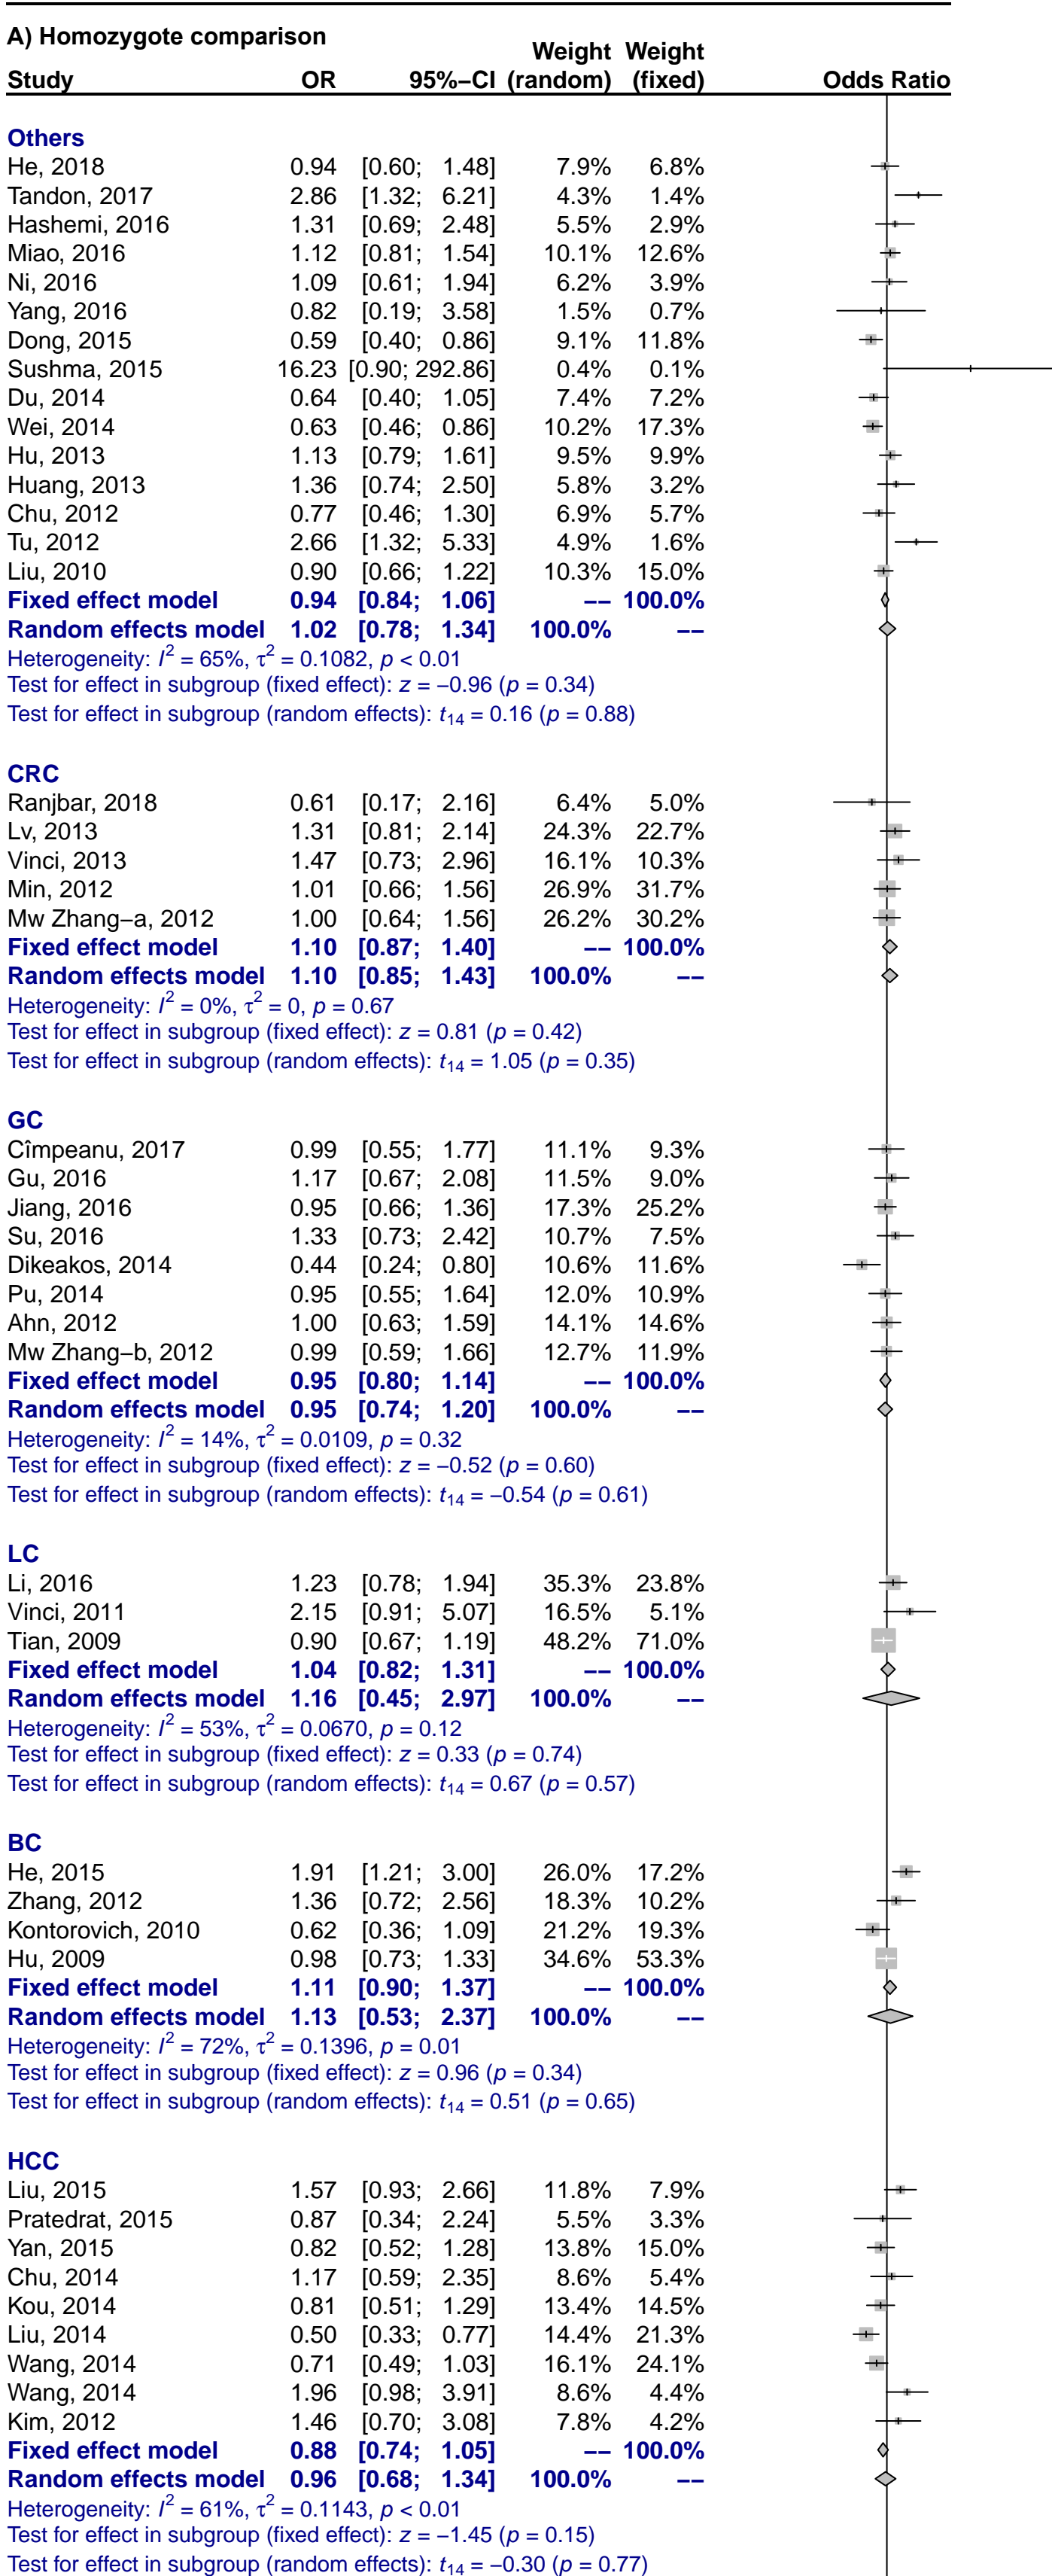

B) Heterozygote comparison

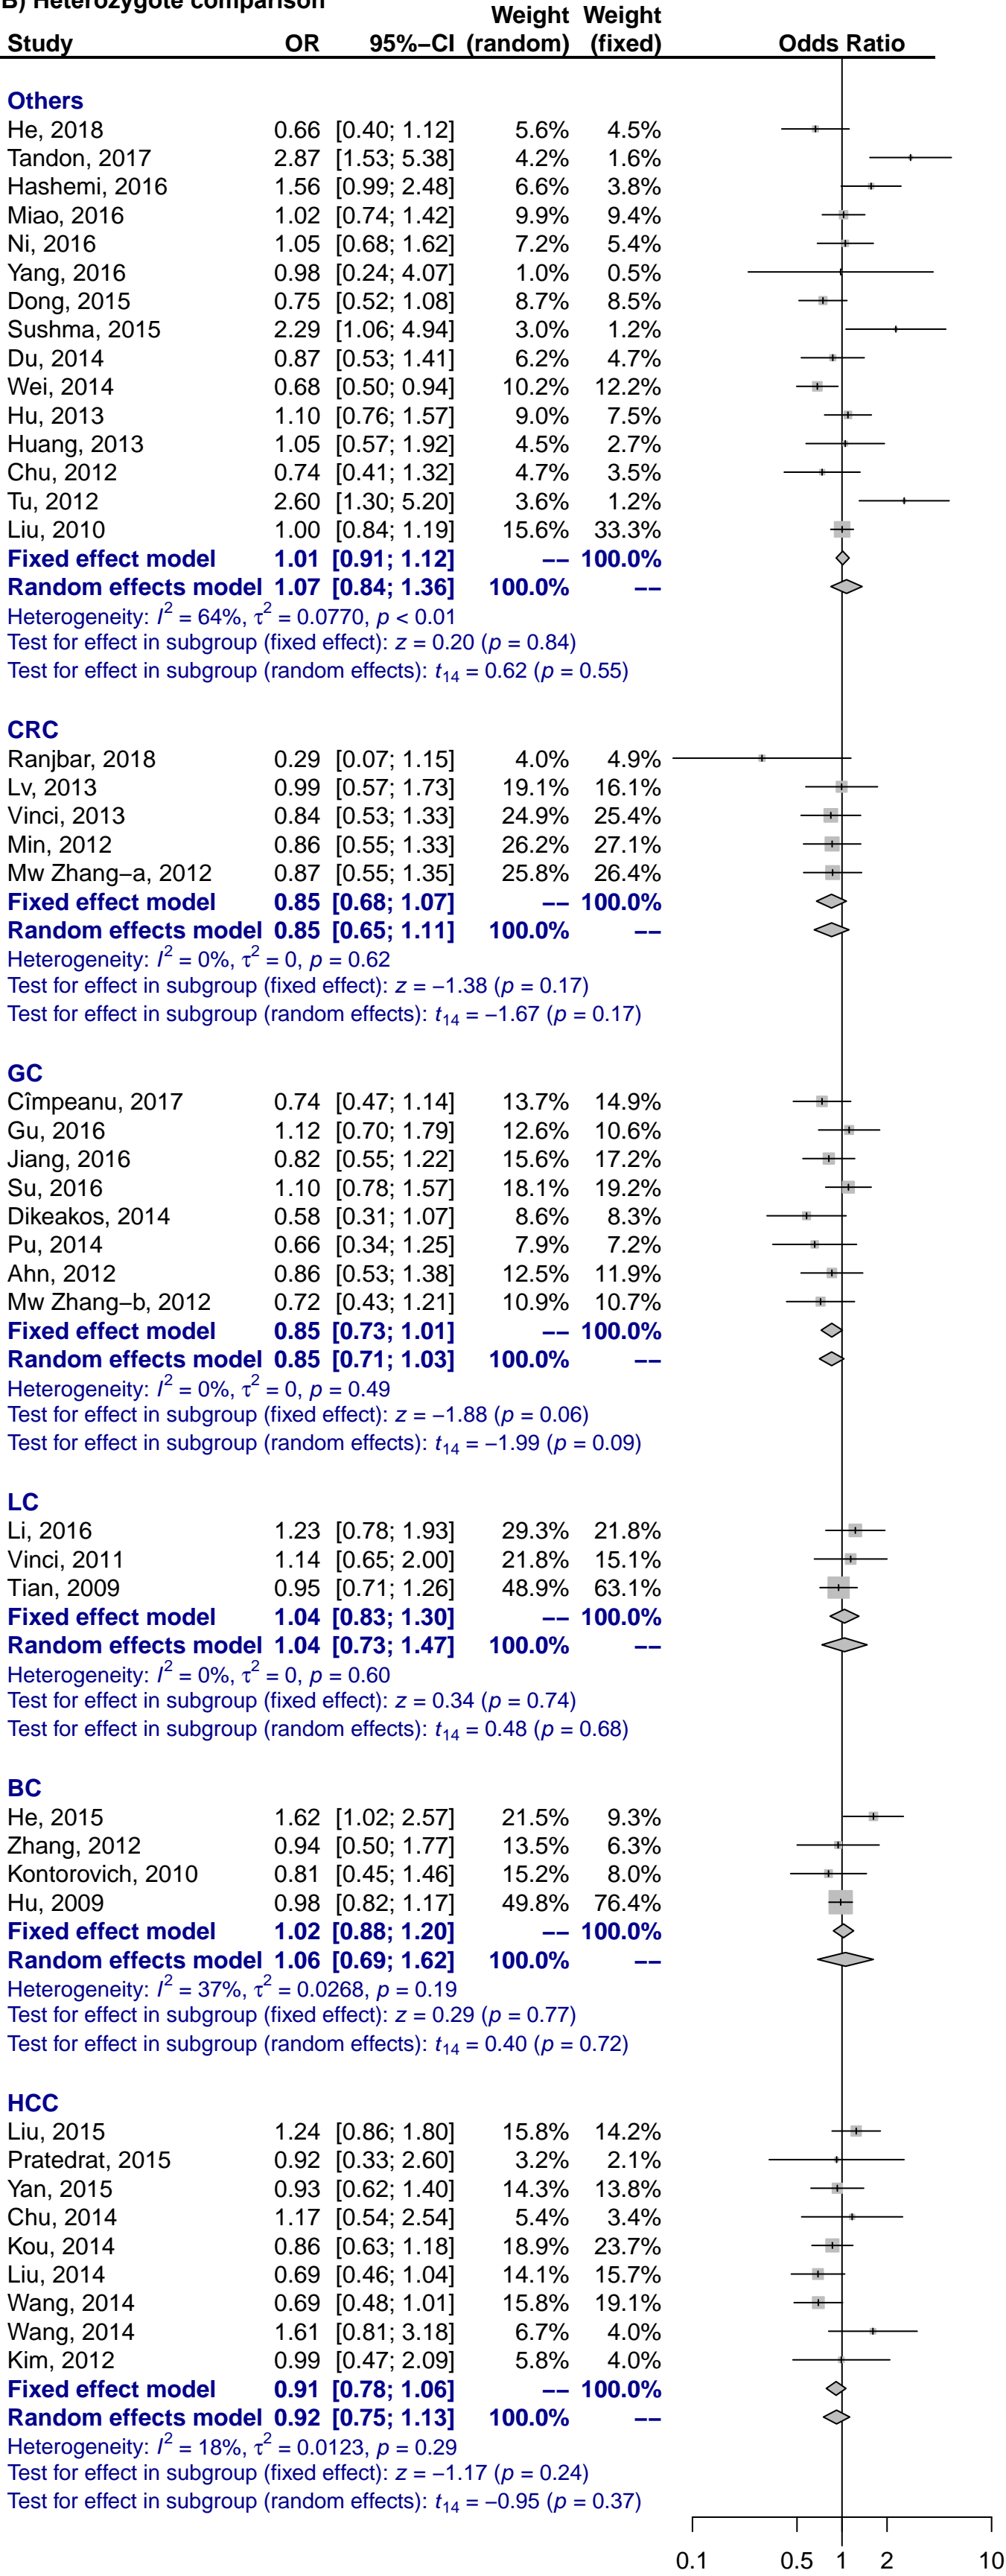

C) Dominant comparison

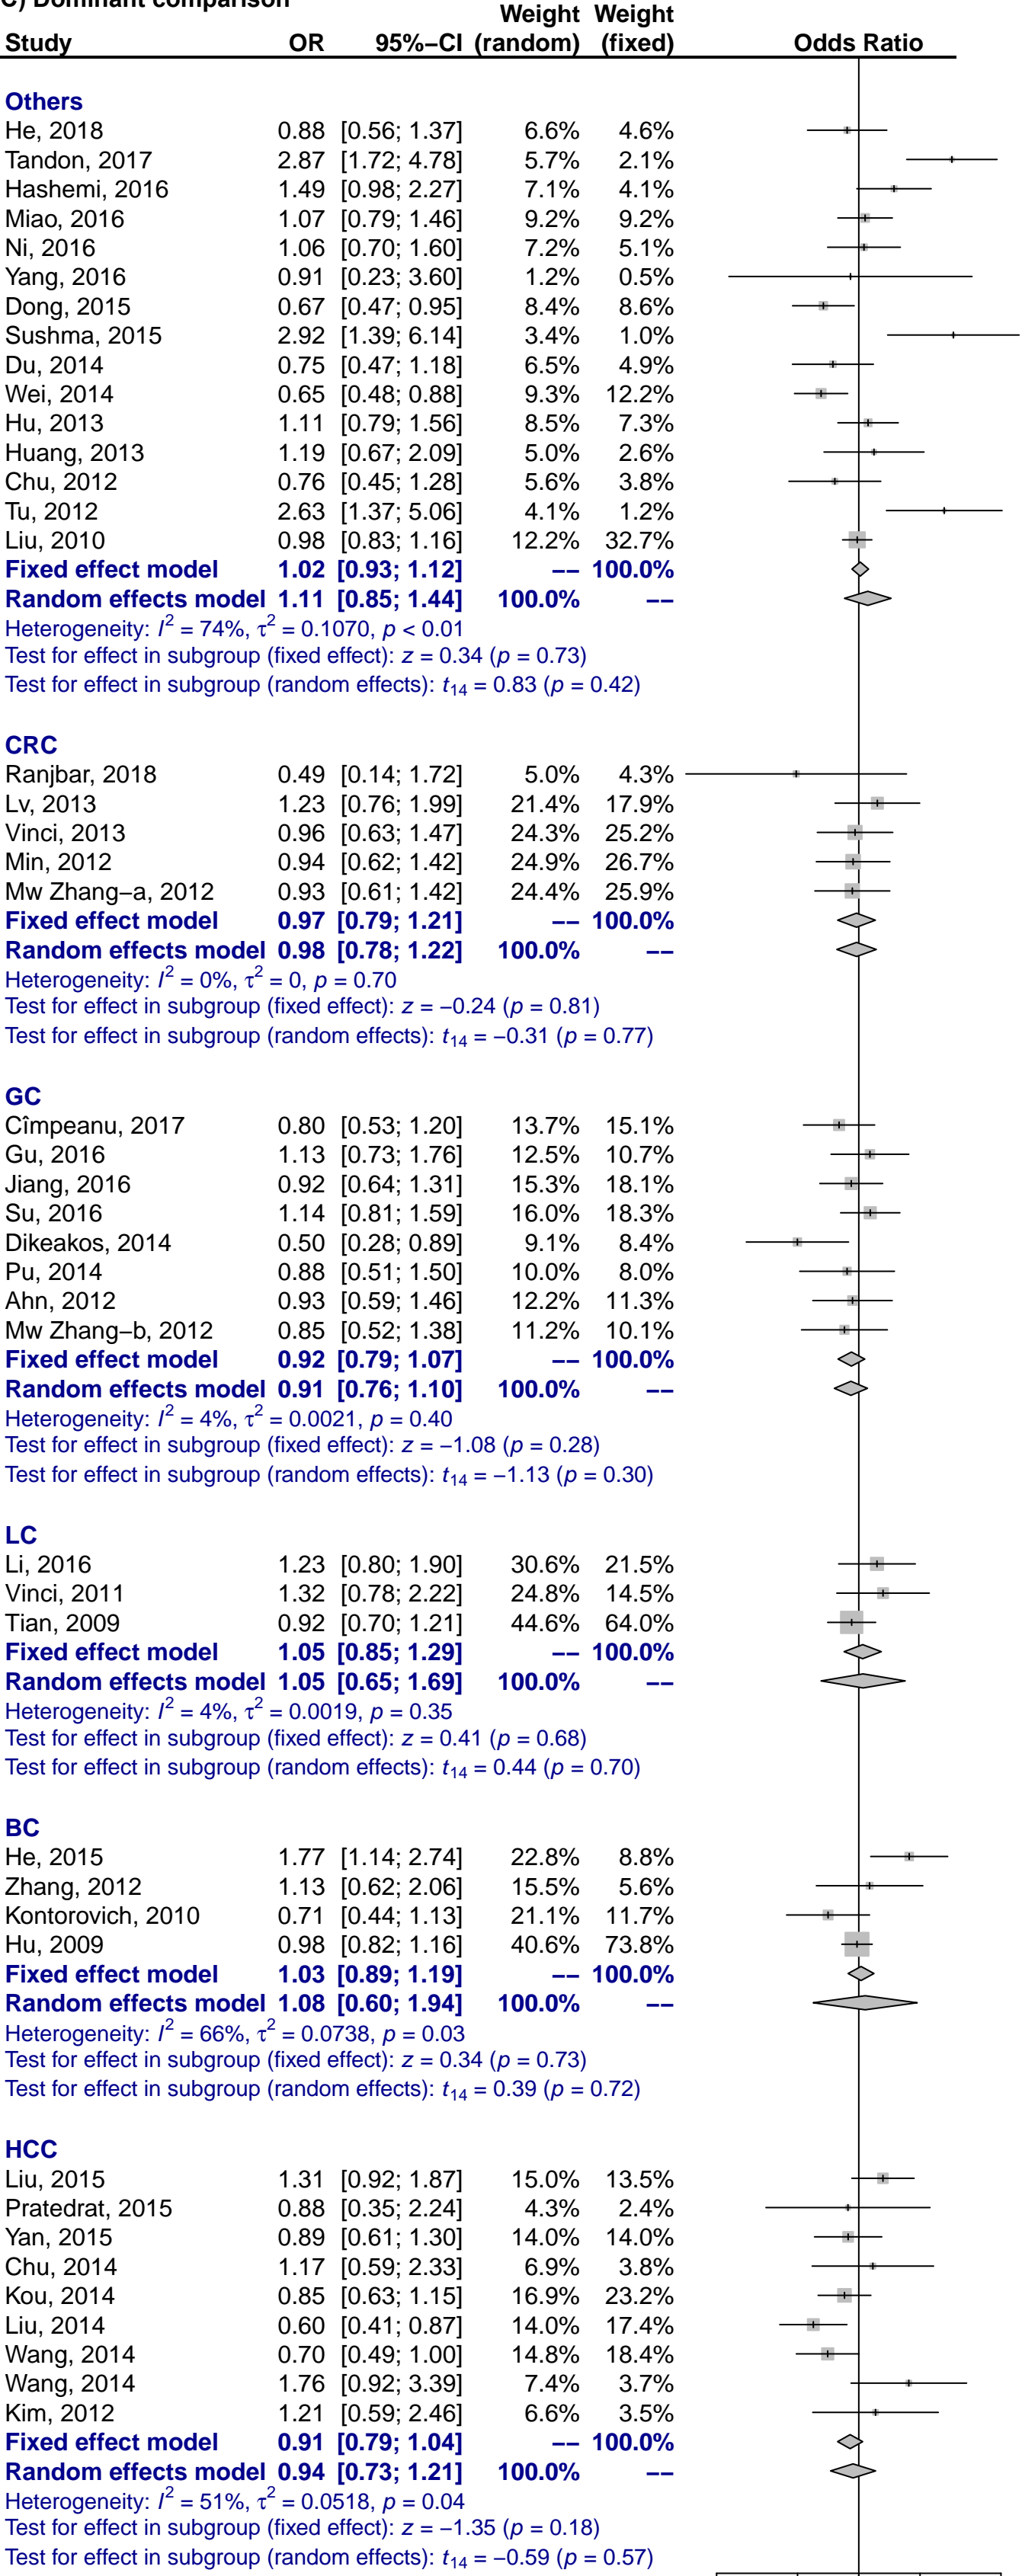



D) Recessive comparison

| Study                                                                        | OR    | 95%–CI         | Weight (random) | Weight (fixed) | Odds Ratio |
|------------------------------------------------------------------------------|-------|----------------|-----------------|----------------|------------|
| Others                                                                       |       |                |                 |                |            |
| He, 2018                                                                     | 1.26  | [0.95; 1.66]   | 8.8%            | 7.1%           |            |
| Tandon, 2017                                                                 | 2.47  | [1.14; 5.33]   | 2.0%            | 0.7%           |            |
| Hashemi, 2016                                                                | 1.09  | [0.59; 2.00]   | 3.0%            | 1.6%           |            |
| Miao, 2016                                                                   | 1.10  | [0.91; 1.33]   | 12.0%           | 15.8%          |            |
| Ni, 2016                                                                     | 1.05  | [0.63; 1.75]   | 4.0%            | 2.3%           |            |
| Yang, 2016                                                                   | 0.84  | [0.36; 1.95]   | 1.7%            | 0.9%           |            |
| Dong, 2015                                                                   | 0.74  | [0.57; 0.95]   | 9.5%            | 10.8%          |            |
| Sushma, 2015                                                                 | 14.10 | [0.78; 253.71] | 0.2%            | 0.0%           |            |
| Du, 2014                                                                     | 0.72  | [0.54; 0.97]   | 8.3%            | 8.2%           |            |
| Wei, 2014                                                                    | 0.85  | [0.71; 1.02]   | 12.4%           | 19.5%          |            |
| Hu, 2013                                                                     | 1.05  | [0.85; 1.29]   | 11.2%           | 13.1%          |            |
| Huang, 2013                                                                  | 1.31  | [0.87; 1.97]   | 5.5%            | 3.2%           |            |
| Chu, 2012                                                                    | 0.96  | [0.72; 1.30]   | 8.2%            | 6.9%           |            |
| Tu, 2012                                                                     | 1.24  | [0.80; 1.91]   | 5.1%            | 2.9%           |            |
| Liu, 2010                                                                    | 0.90  | [0.67; 1.21]   | 8.1%            | 7.1%           |            |
| Fixed effect model                                                           | 0.98  | [0.91; 1.06]   | --              | 100.0%         |            |
| Random effects model                                                         | 1.00  | [0.87; 1.16]   | 100.0%          | --             |            |
| Heterogeneity: $I^2 = 51\%$ , $\tau^2 = 0.0261$ , $p = 0.01$                 |       |                |                 |                |            |
| Test for effect in subgroup (fixed effect): $z = -0.46$ ( $p = 0.65$ )       |       |                |                 |                |            |
| Test for effect in subgroup (random effects): $t_{14} = 0.04$ ( $p = 0.97$ ) |       |                |                 |                |            |
| CRC                                                                          |       |                |                 |                |            |
| Ranjbar, 2018                                                                | 1.55  | [0.77; 3.09]   | 7.6%            | 4.2%           |            |
| Lv, 2013                                                                     | 1.32  | [0.97; 1.79]   | 25.0%           | 23.1%          |            |
| Vinci, 2013                                                                  | 1.59  | [0.82; 3.10]   | 8.1%            | 4.4%           |            |
| Min, 2012                                                                    | 1.14  | [0.89; 1.48]   | 30.2%           | 35.4%          |            |
| Mw Zhang–a, 2012                                                             | 1.12  | [0.86; 1.46]   | 29.0%           | 32.9%          |            |
| Fixed effect model                                                           | 1.21  | [1.04; 1.41]   | --              | 100.0%         |            |
| Random effects model                                                         | 1.21  | [1.05; 1.41]   | 100.0%          | --             |            |
| Heterogeneity: $I^2 = 0\%$ , $\tau^2 = 0$ , $p = 0.75$                       |       |                |                 |                |            |
| Test for effect in subgroup (fixed effect): $z = 2.53$ ( $p = 0.01$ )        |       |                |                 |                |            |
| Test for effect in subgroup (random effects): $t_{14} = 3.63$ ( $p = 0.02$ ) |       |                |                 |                |            |
| GC                                                                           |       |                |                 |                |            |
| Cîmpeanu, 2017                                                               | 1.13  | [0.65; 1.97]   | 6.8%            | 4.3%           |            |
| Gu, 2016                                                                     | 1.10  | [0.67; 1.80]   | 8.1%            | 5.6%           |            |
| Jiang, 2016                                                                  | 1.10  | [0.90; 1.35]   | 22.1%           | 32.1%          |            |
| Su, 2016                                                                     | 1.26  | [0.71; 2.25]   | 6.4%            | 3.8%           |            |
| Dikeakos, 2014                                                               | 0.68  | [0.48; 0.97]   | 12.7%           | 13.6%          |            |
| Pu, 2014                                                                     | 1.24  | [0.85; 1.80]   | 12.1%           | 9.4%           |            |
| Ahn, 2012                                                                    | 1.13  | [0.87; 1.47]   | 18.2%           | 19.9%          |            |
| Mw Zhang–b, 2012                                                             | 1.26  | [0.90; 1.77]   | 13.7%           | 11.1%          |            |
| Fixed effect model                                                           | 1.09  | [0.97; 1.22]   | --              | 100.0%         |            |
| Random effects model                                                         | 1.09  | [0.93; 1.28]   | 100.0%          | --             |            |
| Heterogeneity: $I^2 = 14\%$ , $\tau^2 = 0.0051$ , $p = 0.32$                 |       |                |                 |                |            |
| Test for effect in subgroup (fixed effect): $z = 1.42$ ( $p = 0.16$ )        |       |                |                 |                |            |
| Test for effect in subgroup (random effects): $t_{14} = 1.25$ ( $p = 0.25$ ) |       |                |                 |                |            |
| LC                                                                           |       |                |                 |                |            |
| Li, 2016                                                                     | 1.04  | [0.80; 1.35]   | 39.2%           | 28.9%          |            |
| Vinci, 2011                                                                  | 2.02  | [0.89; 4.57]   | 7.5%            | 2.1%           |            |
| Tian, 2009                                                                   | 0.94  | [0.79; 1.11]   | 53.3%           | 69.0%          |            |
| Fixed effect model                                                           | 0.99  | [0.86; 1.14]   | --              | 100.0%         |            |
| Random effects model                                                         | 1.03  | [0.57; 1.84]   | 100.0%          | --             |            |
| Heterogeneity: $I^2 = 42\%$ , $\tau^2 = 0.0168$ , $p = 0.18$                 |       |                |                 |                |            |
| Test for effect in subgroup (fixed effect): $z = -0.16$ ( $p = 0.87$ )       |       |                |                 |                |            |
| Test for effect in subgroup (random effects): $t_{14} = 0.21$ ( $p = 0.86$ ) |       |                |                 |                |            |
| BC                                                                           |       |                |                 |                |            |
| He, 2015                                                                     | 1.29  | [1.00; 1.68]   | 33.1%           | 35.8%          |            |
| Zhang, 2012                                                                  | 1.43  | [0.99; 2.06]   | 22.9%           | 17.7%          |            |
| Kontorovich, 2010                                                            | 0.67  | [0.40; 1.13]   | 13.7%           | 12.5%          |            |
| Hu, 2009                                                                     | 0.99  | [0.74; 1.32]   | 30.2%           | 34.1%          |            |
| Fixed effect model                                                           | 1.14  | [0.97; 1.34]   | --              | 100.0%         |            |
| Random effects model                                                         | 1.10  | [0.68; 1.78]   | 100.0%          | --             |            |
| Heterogeneity: $I^2 = 59\%$ , $\tau^2 = 0.0420$ , $p = 0.06$                 |       |                |                 |                |            |
| Test for effect in subgroup (fixed effect): $z = 1.56$ ( $p = 0.12$ )        |       |                |                 |                |            |
| Test for effect in subgroup (random effects): $t_{14} = 0.65$ ( $p = 0.56$ ) |       |                |                 |                |            |
| HCC                                                                          |       |                |                 |                |            |
| Liu, 2015                                                                    | 1.39  | [0.86; 2.25]   | 7.9%            | 5.0%           |            |
| Pratedrat, 2015                                                              | 0.92  | [0.52; 1.65]   | 5.9%            | 4.2%           |            |
| Yan, 2015                                                                    | 0.86  | [0.60; 1.23]   | 12.1%           | 11.6%          |            |
| Chu, 2014                                                                    | 1.05  | [0.70; 1.57]   | 10.2%           | 8.1%           |            |
| Kou, 2014                                                                    | 0.88  | [0.57; 1.35]   | 9.3%            | 7.9%           |            |
| Liu, 2014                                                                    | 0.64  | [0.47; 0.89]   | 13.6%           | 16.2%          |            |
| Wang, 2014                                                                   | 0.96  | [0.78; 1.18]   | 20.9%           | 33.3%          |            |
| Wang, 2014                                                                   | 1.33  | [0.90; 1.98]   | 10.5%           | 7.4%           |            |
| Kim, 2012                                                                    | 1.48  | [0.97; 2.24]   | 9.7%            | 6.3%           |            |
| Fixed effect model                                                           | 0.98  | [0.87; 1.10]   | --              | 100.0%         |            |
| Random effects model                                                         | 1.00  | [0.81; 1.23]   | 100.0%          | --             |            |
| Heterogeneity: $I^2 = 49\%$ , $\tau^2 = 0.0327$ , $p = 0.05$                 |       |                |                 |                |            |
| Test for effect in subgroup (fixed effect): $z = -0.38$ ( $p = 0.70$ )       |       |                |                 |                |            |
| Test for effect in subgroup (random effects): $t_{14} = 0.01$ ( $p = 0.99$ ) |       |                |                 |                |            |

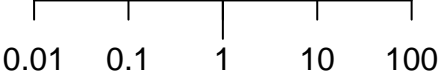

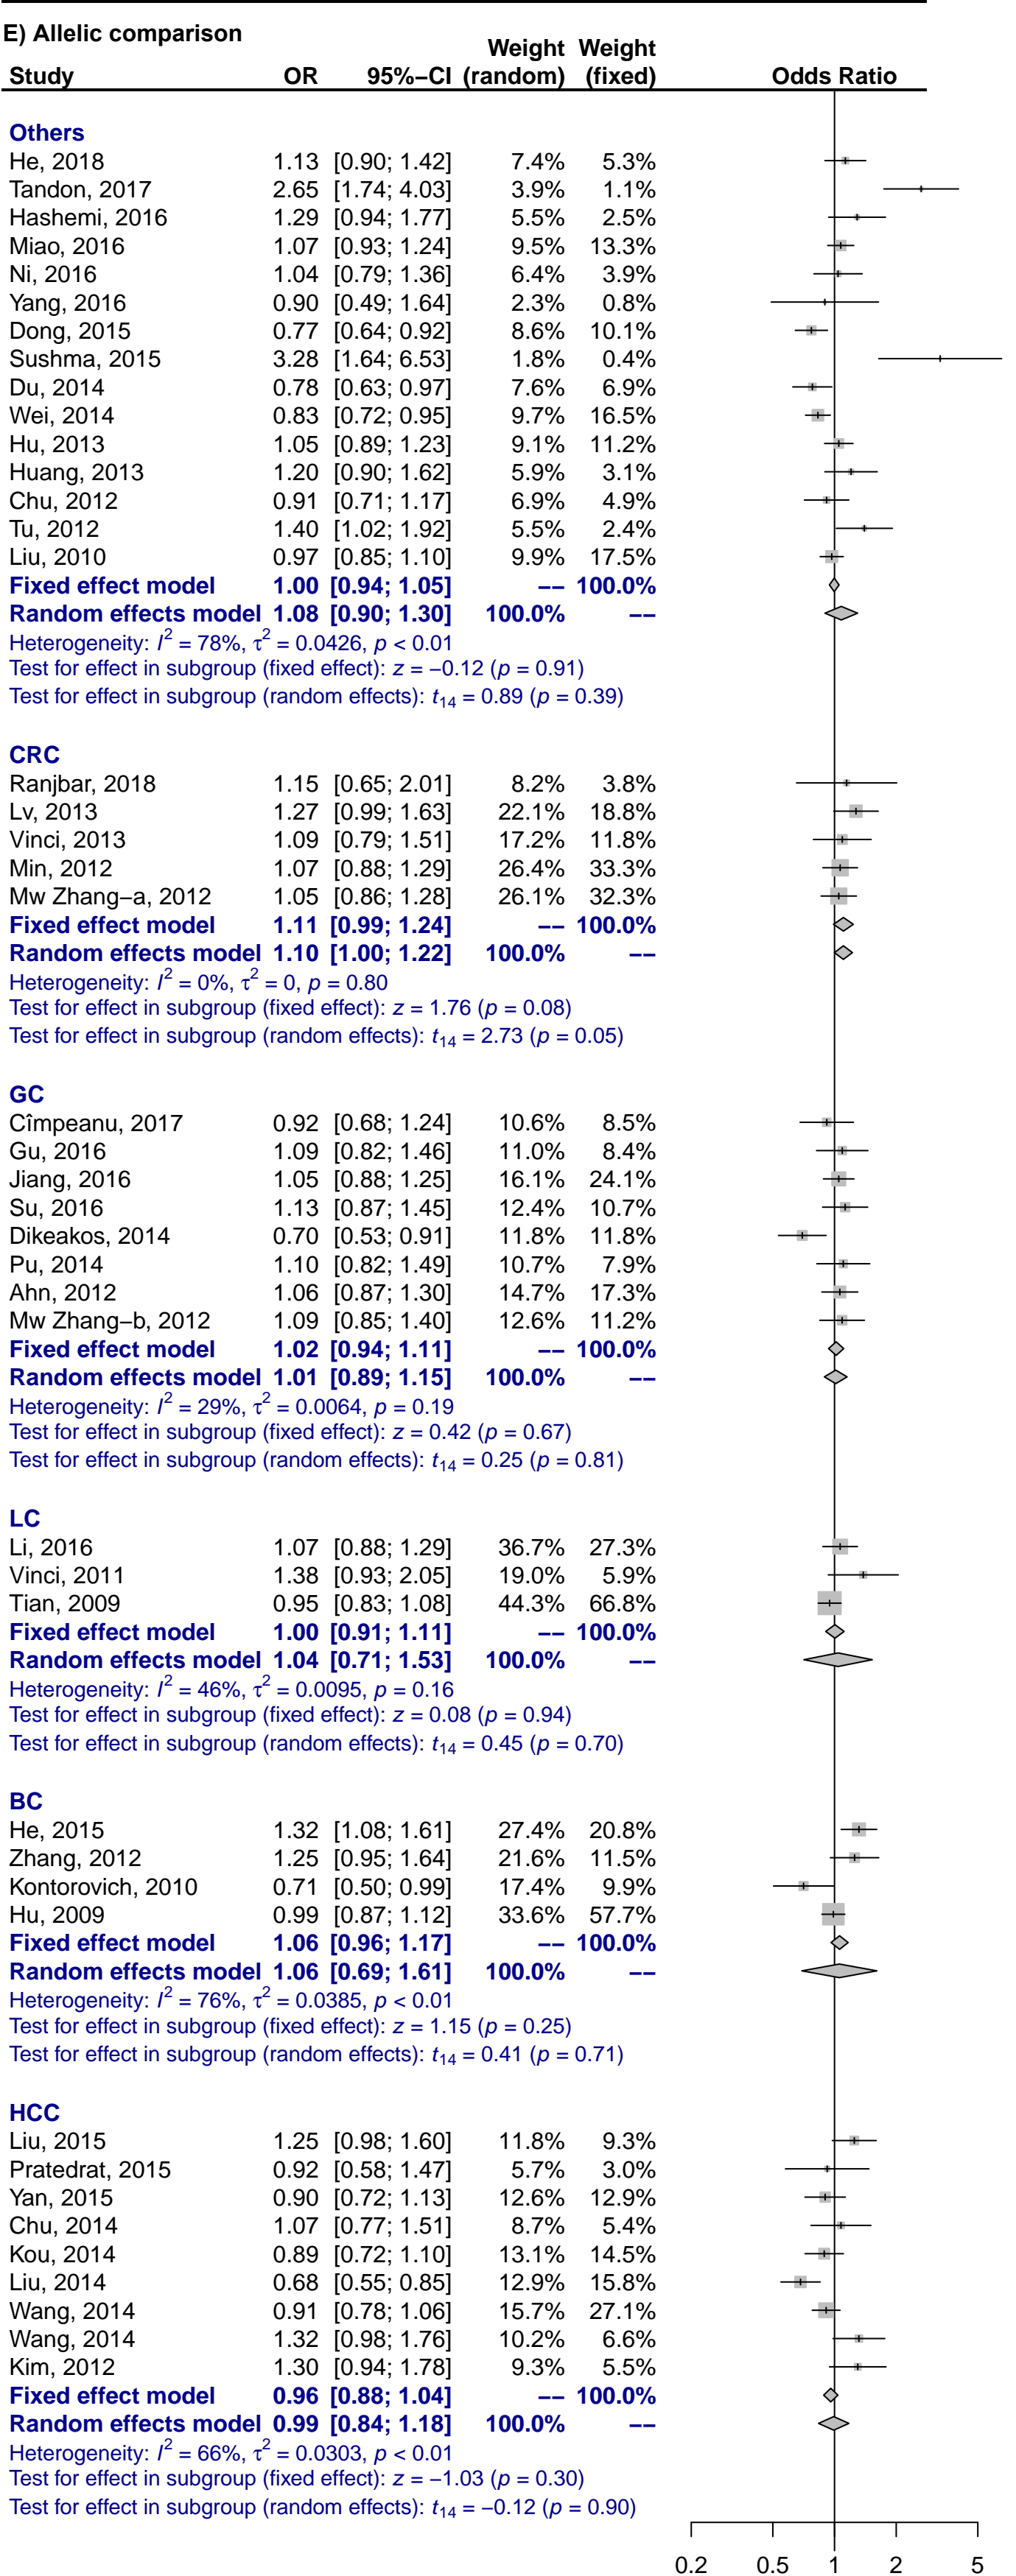

Supplement: Supplementary file 5 [file 14617067]
