# Supplementary material
Source: publisher figshare collection journal article supplement (https://frontiersin.figshare.com/ndownloader/files/14617067)

**Supplementary Figure S5.** Forest plots for meta-analysis of miR-149 rs2292832 sub-grouped according to the broad cancer category. **A)** Homozygote comparison; **B)** Heterozygote comparison; **C)** Dominant model; **D)** Recessive model; **E)** Allele contrast. **Abbreviations:** GI: Gastrointestinal tract cancers; HNC: Head and neck cancers

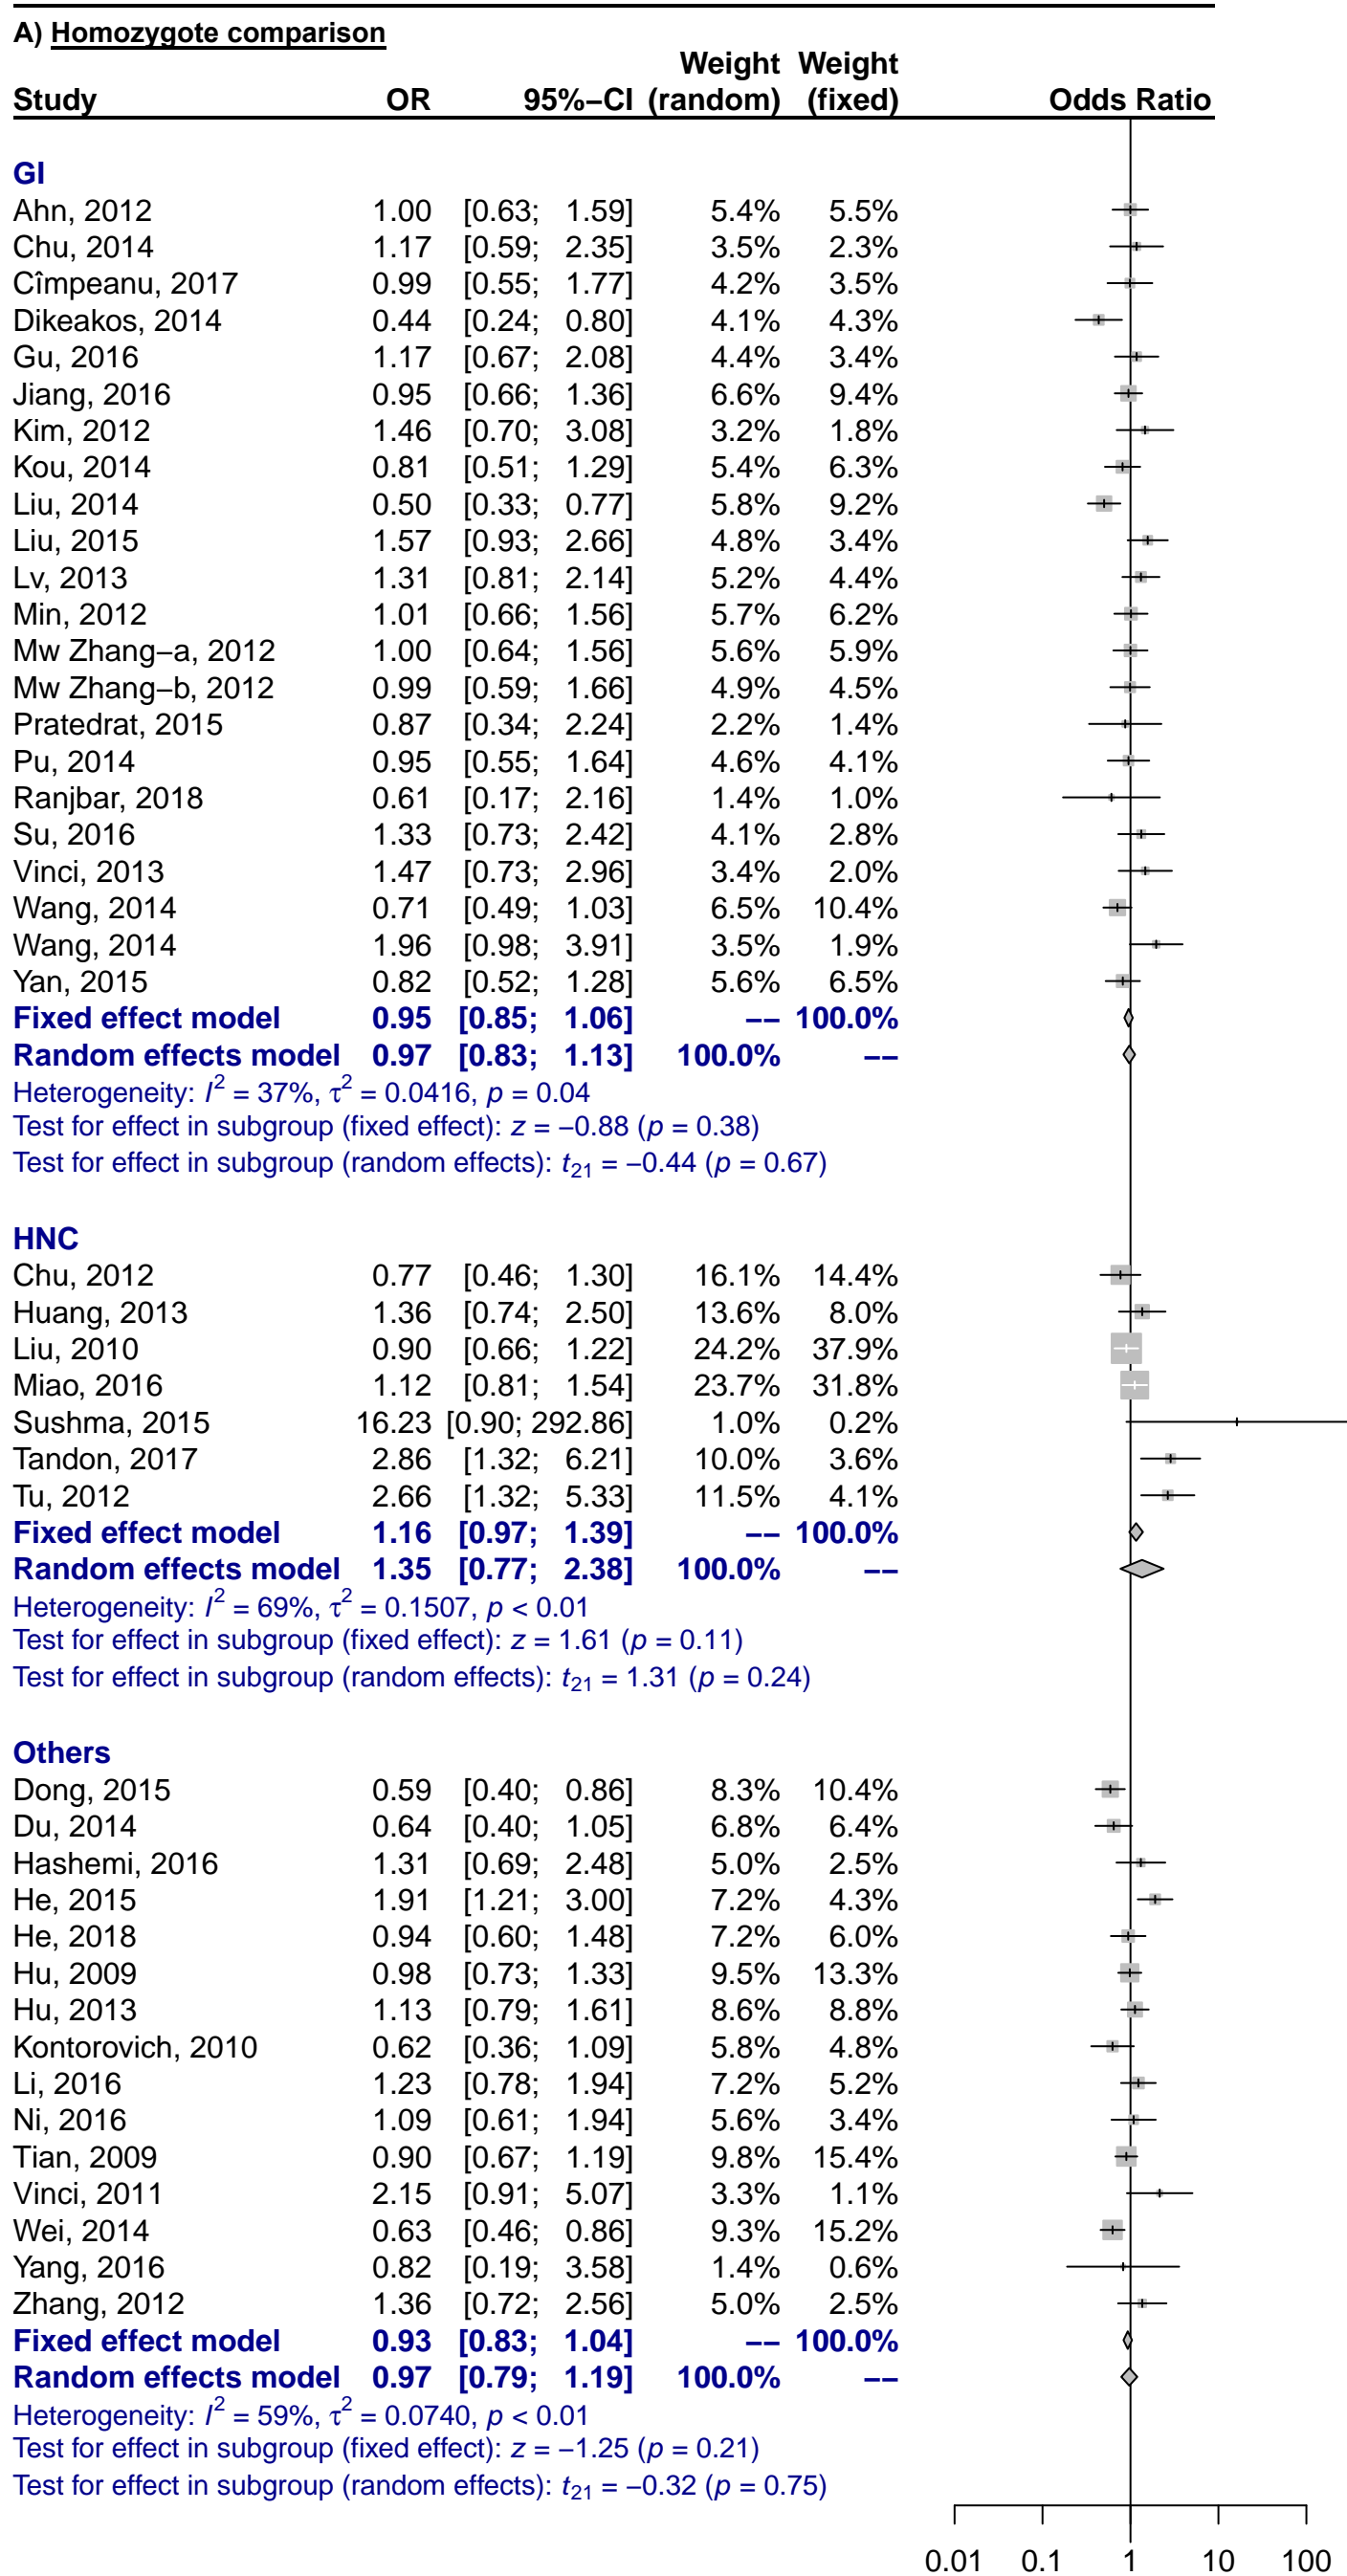

B) Heterozygote comparison

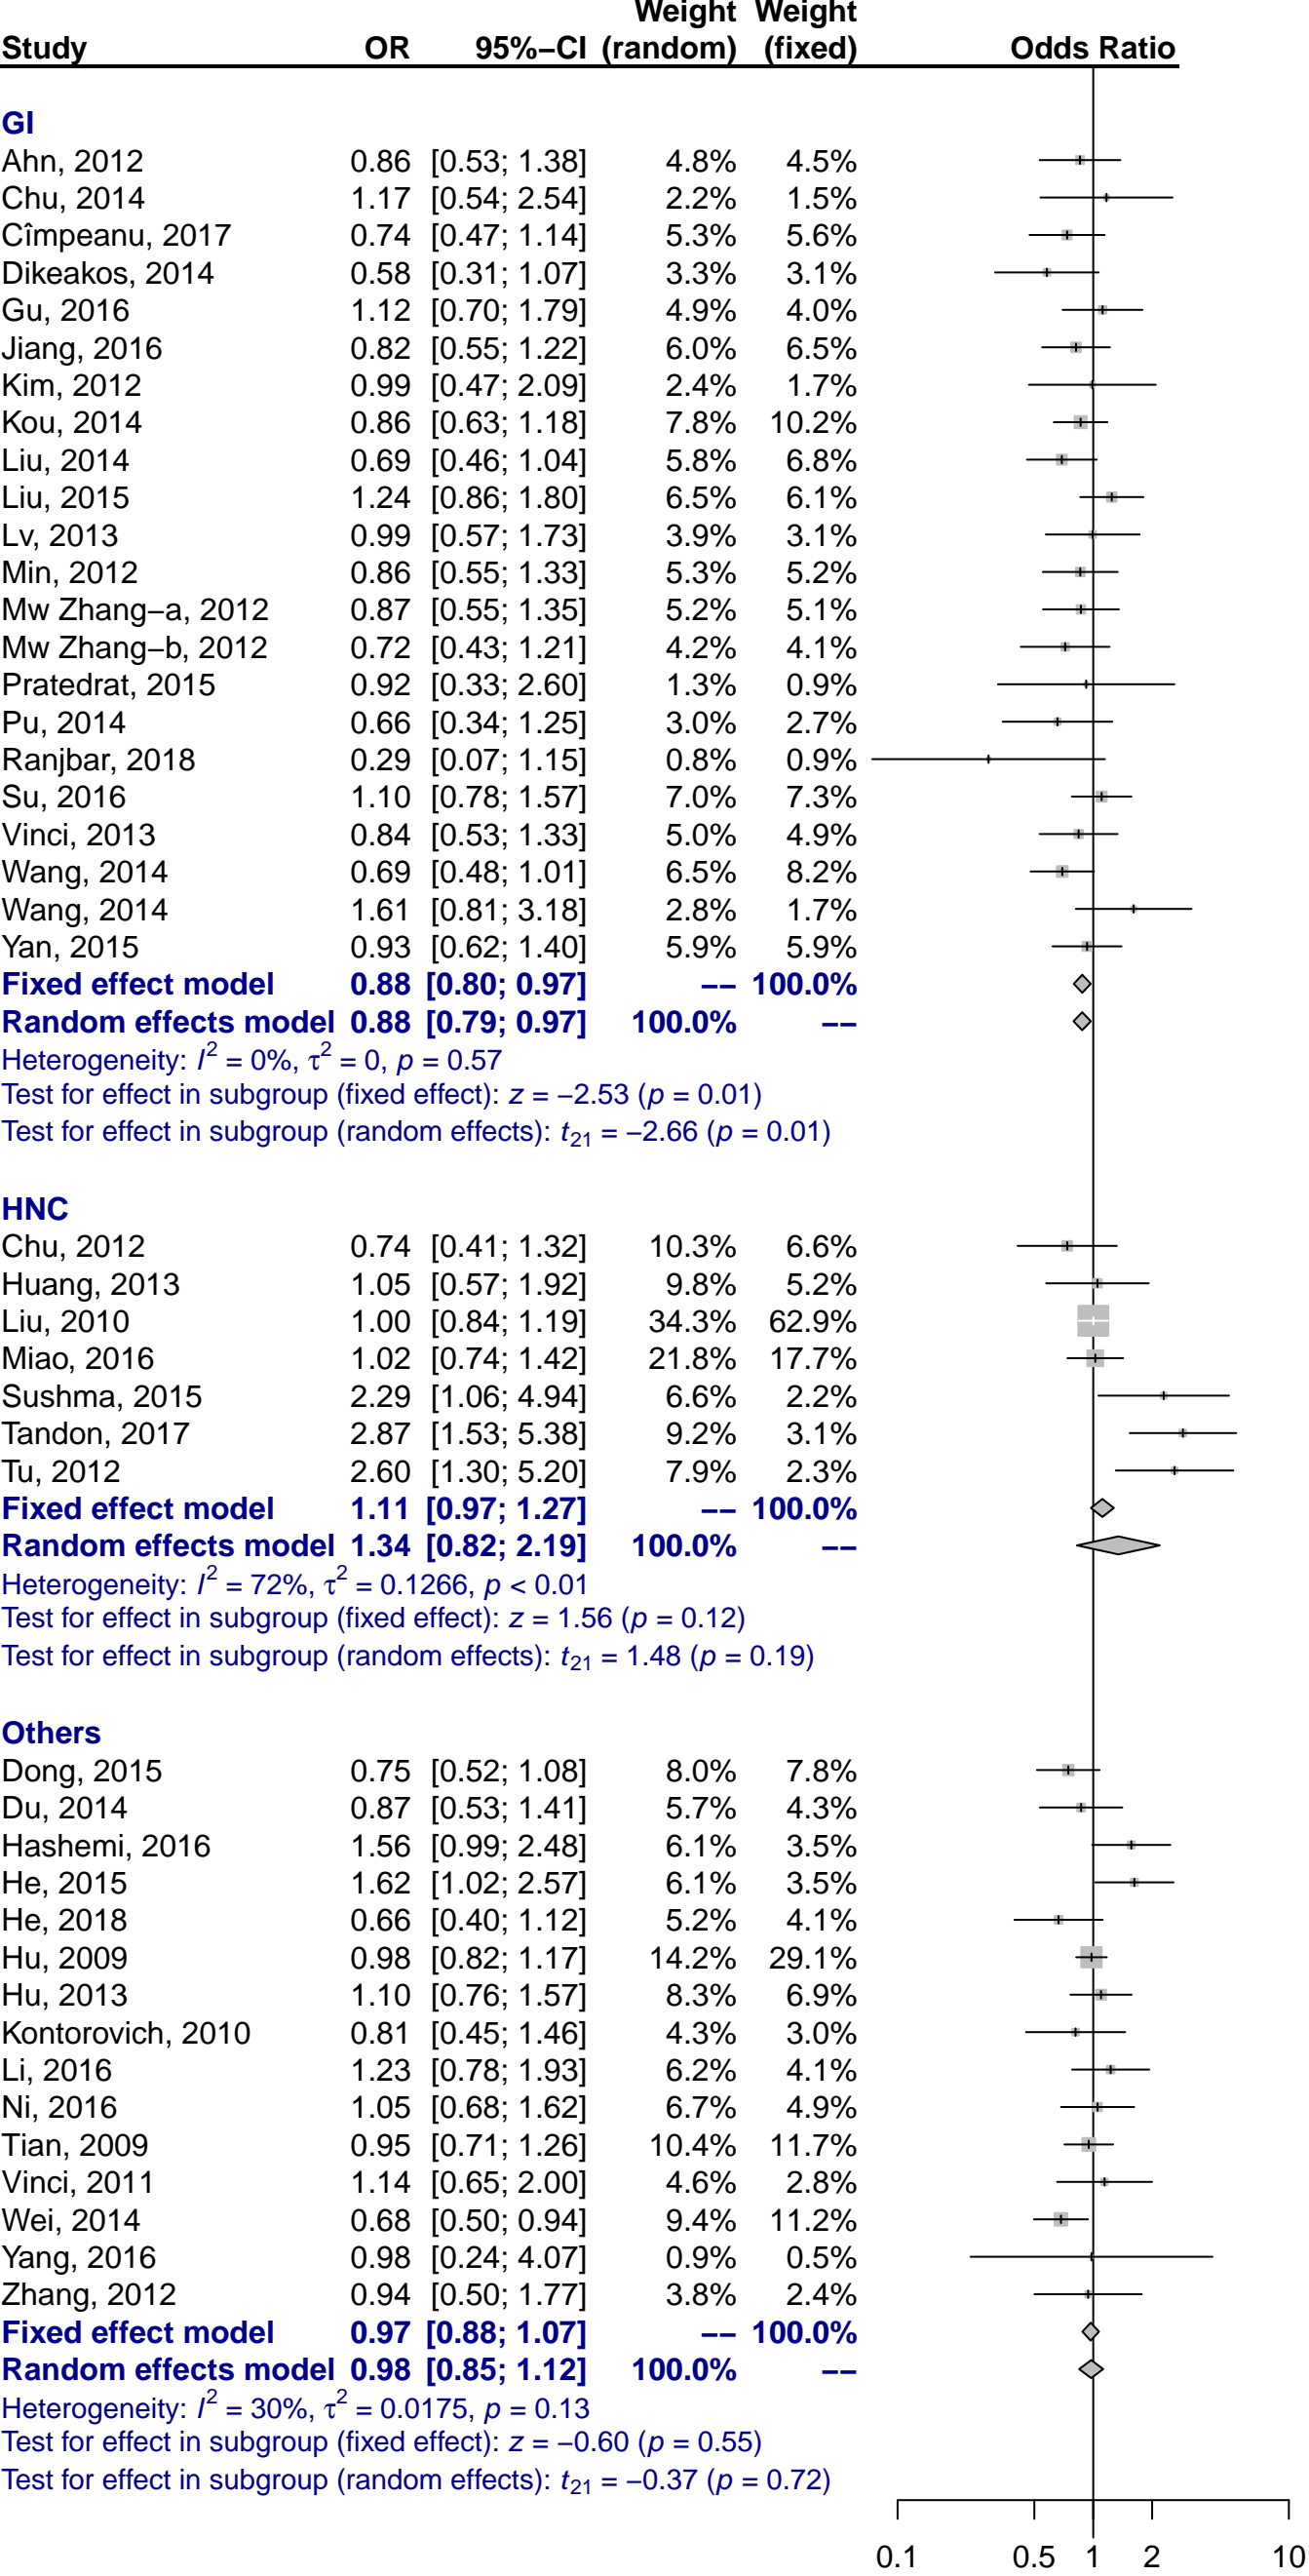

C) Dominant model

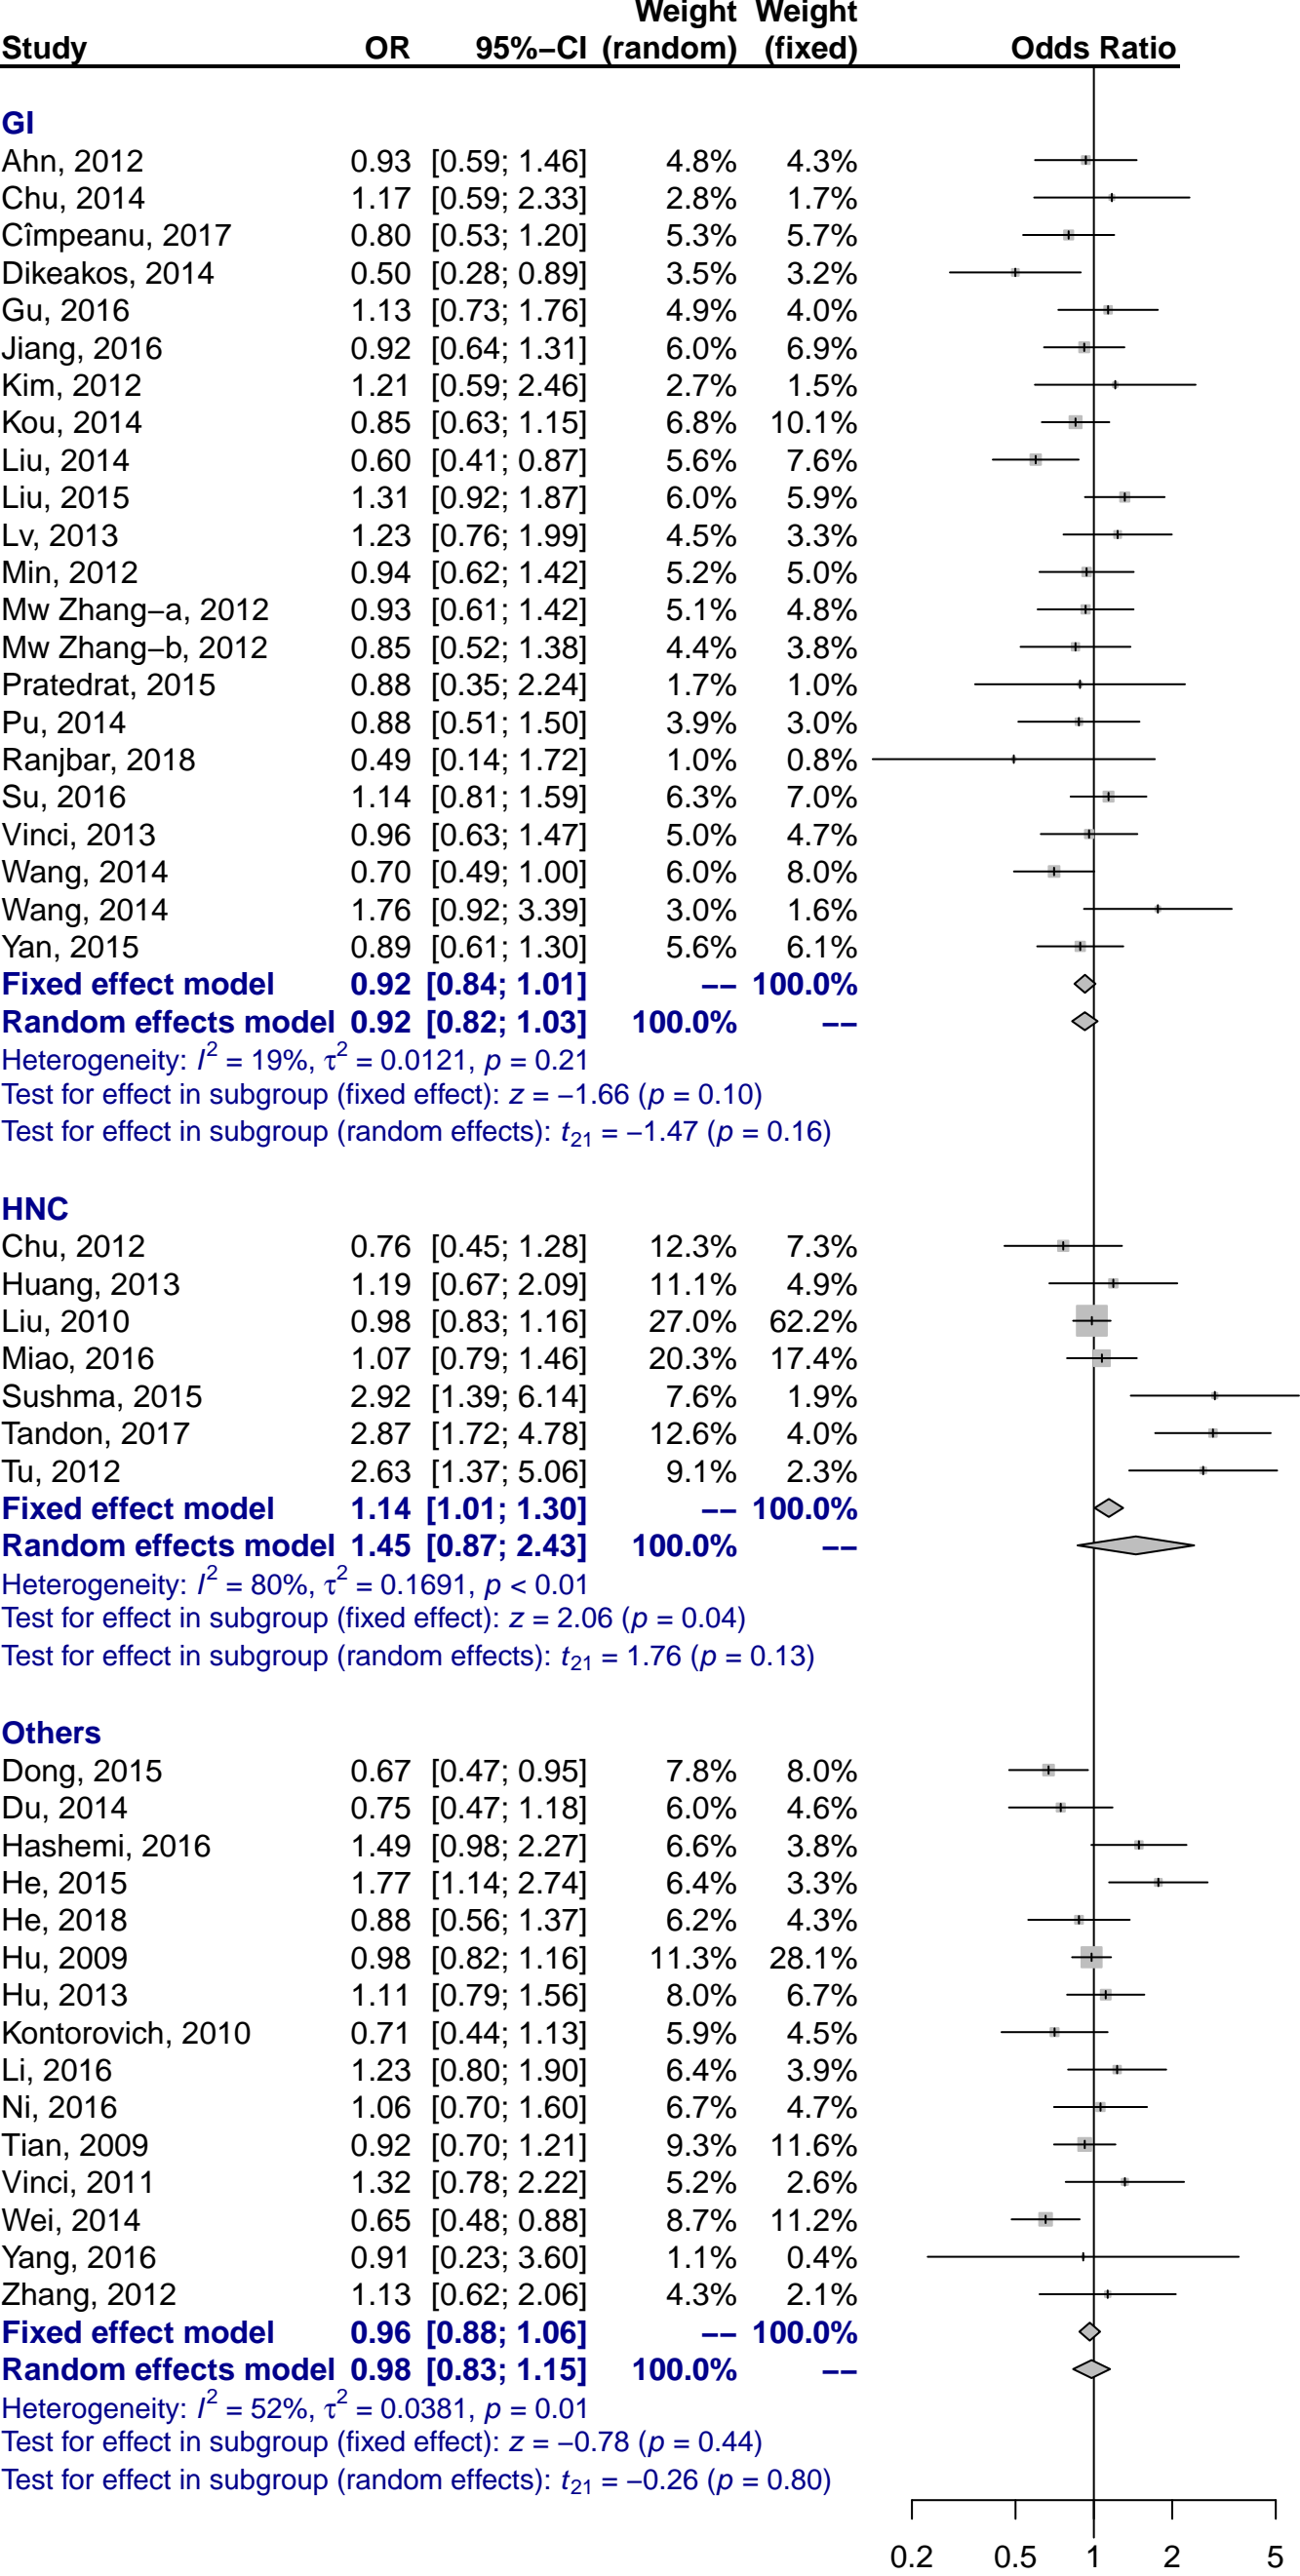

D) recessive model

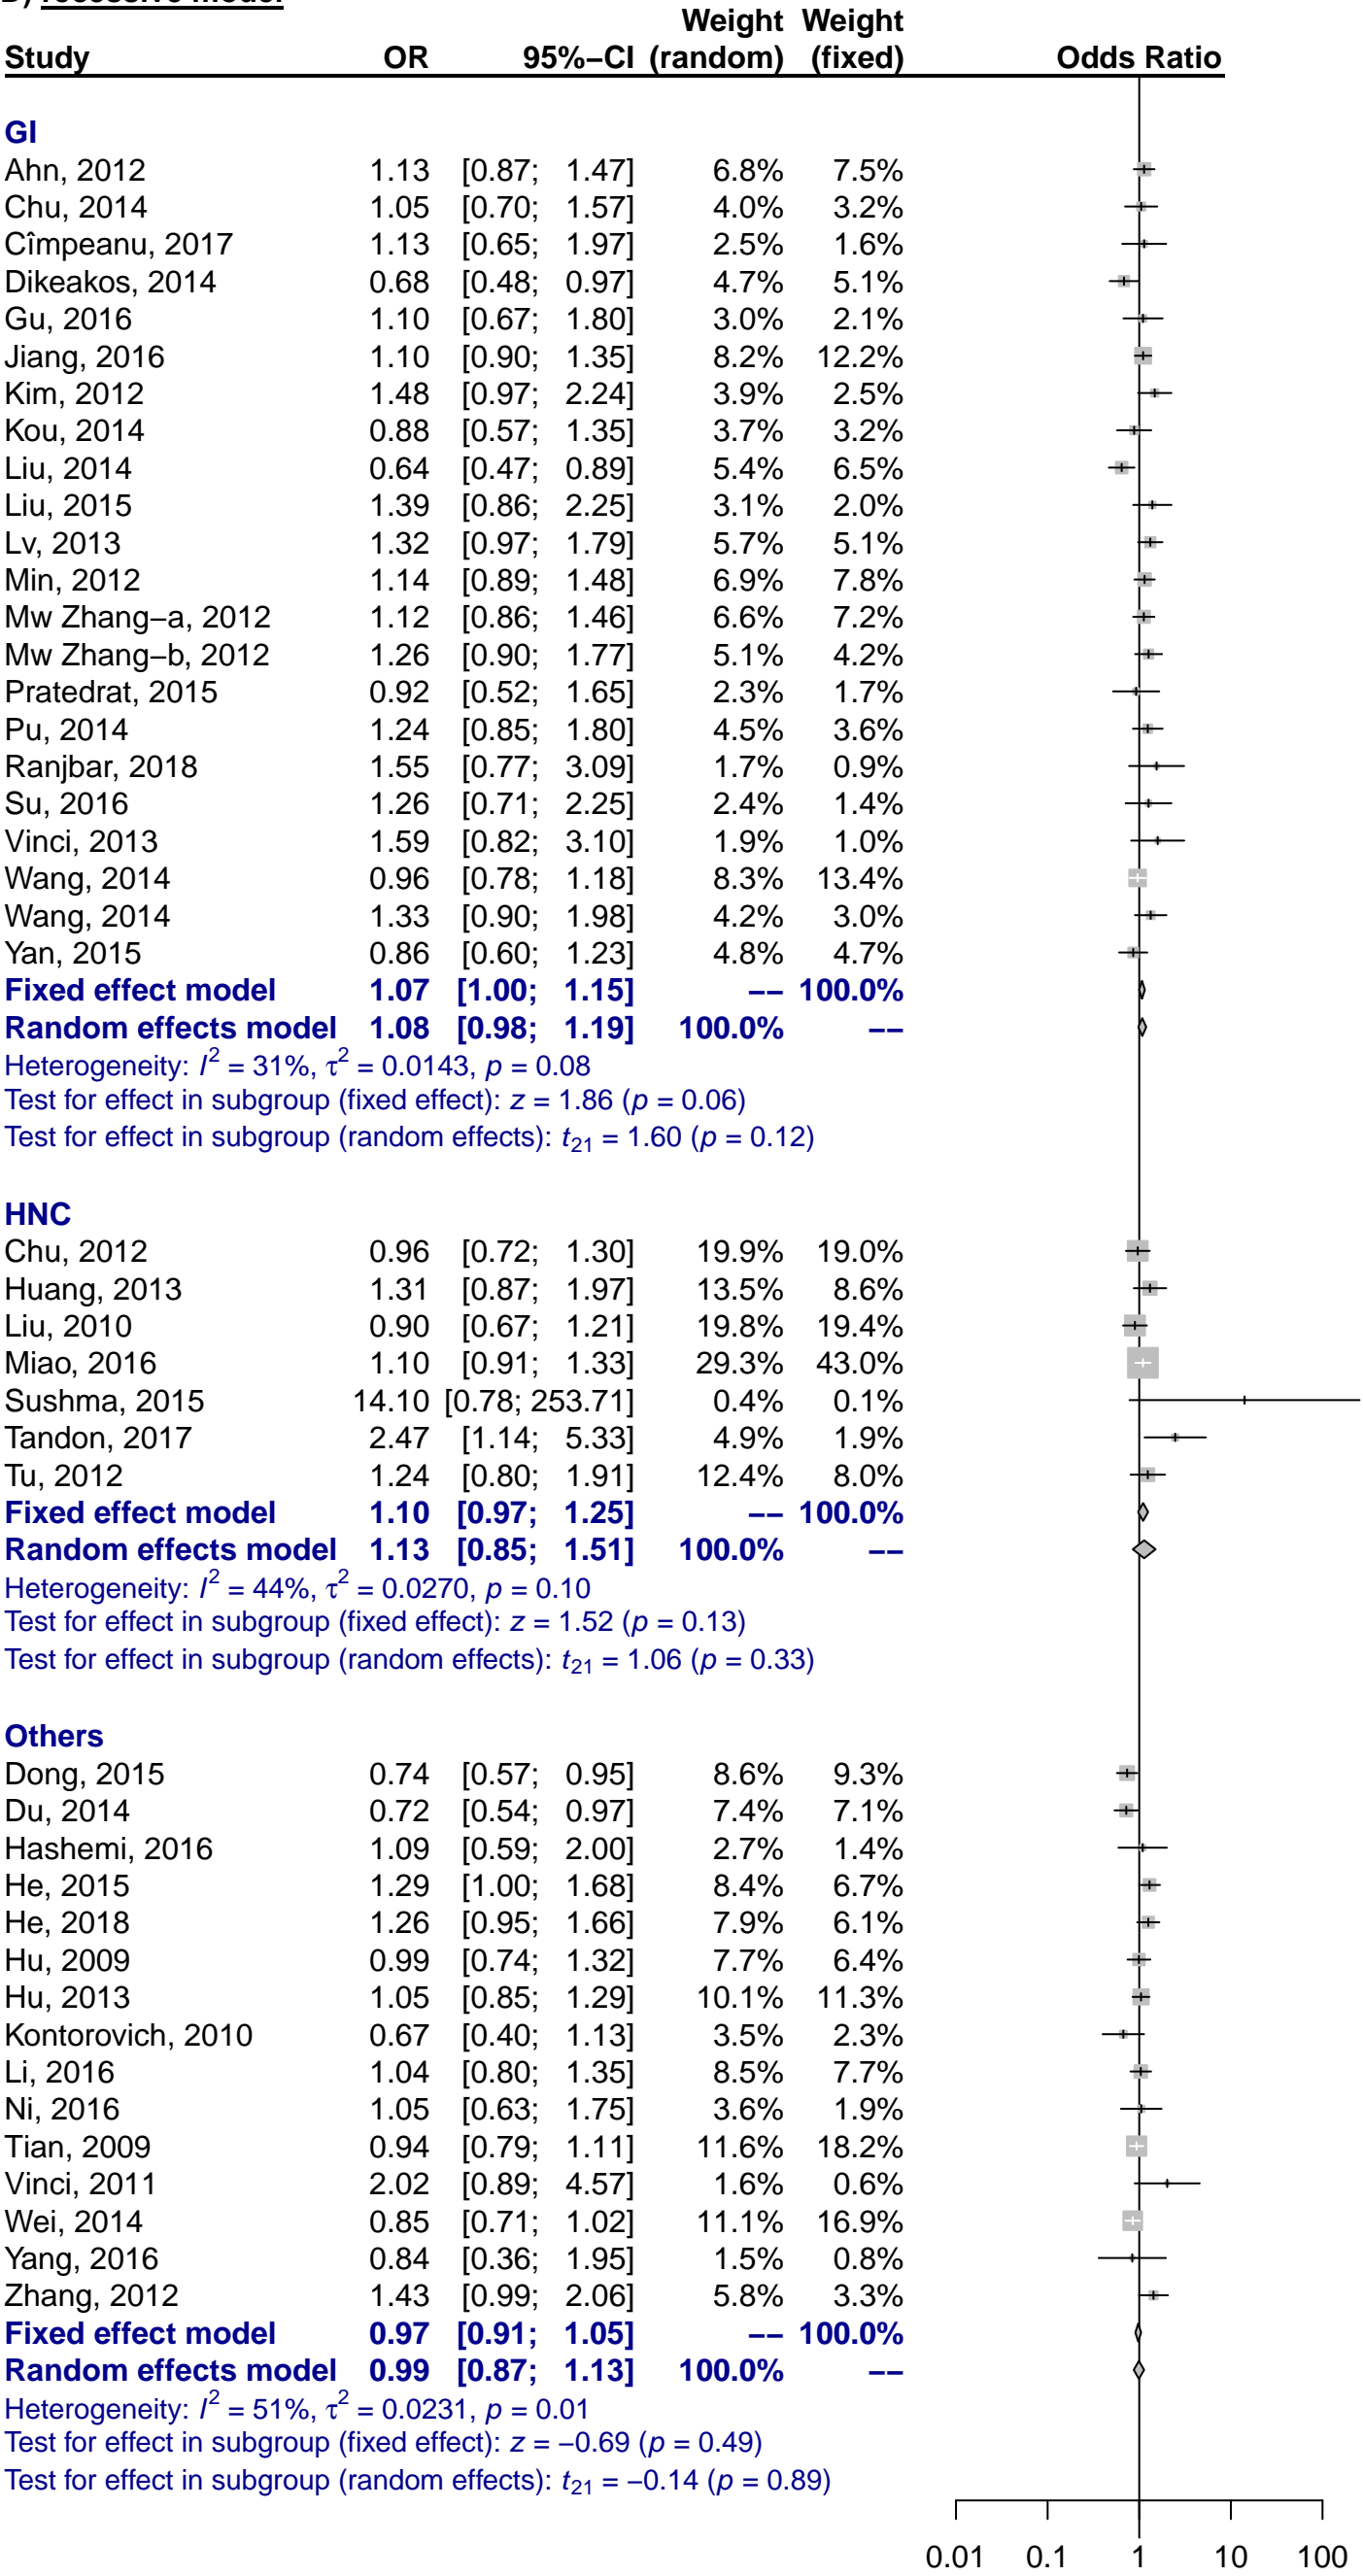



E) Allele contrast

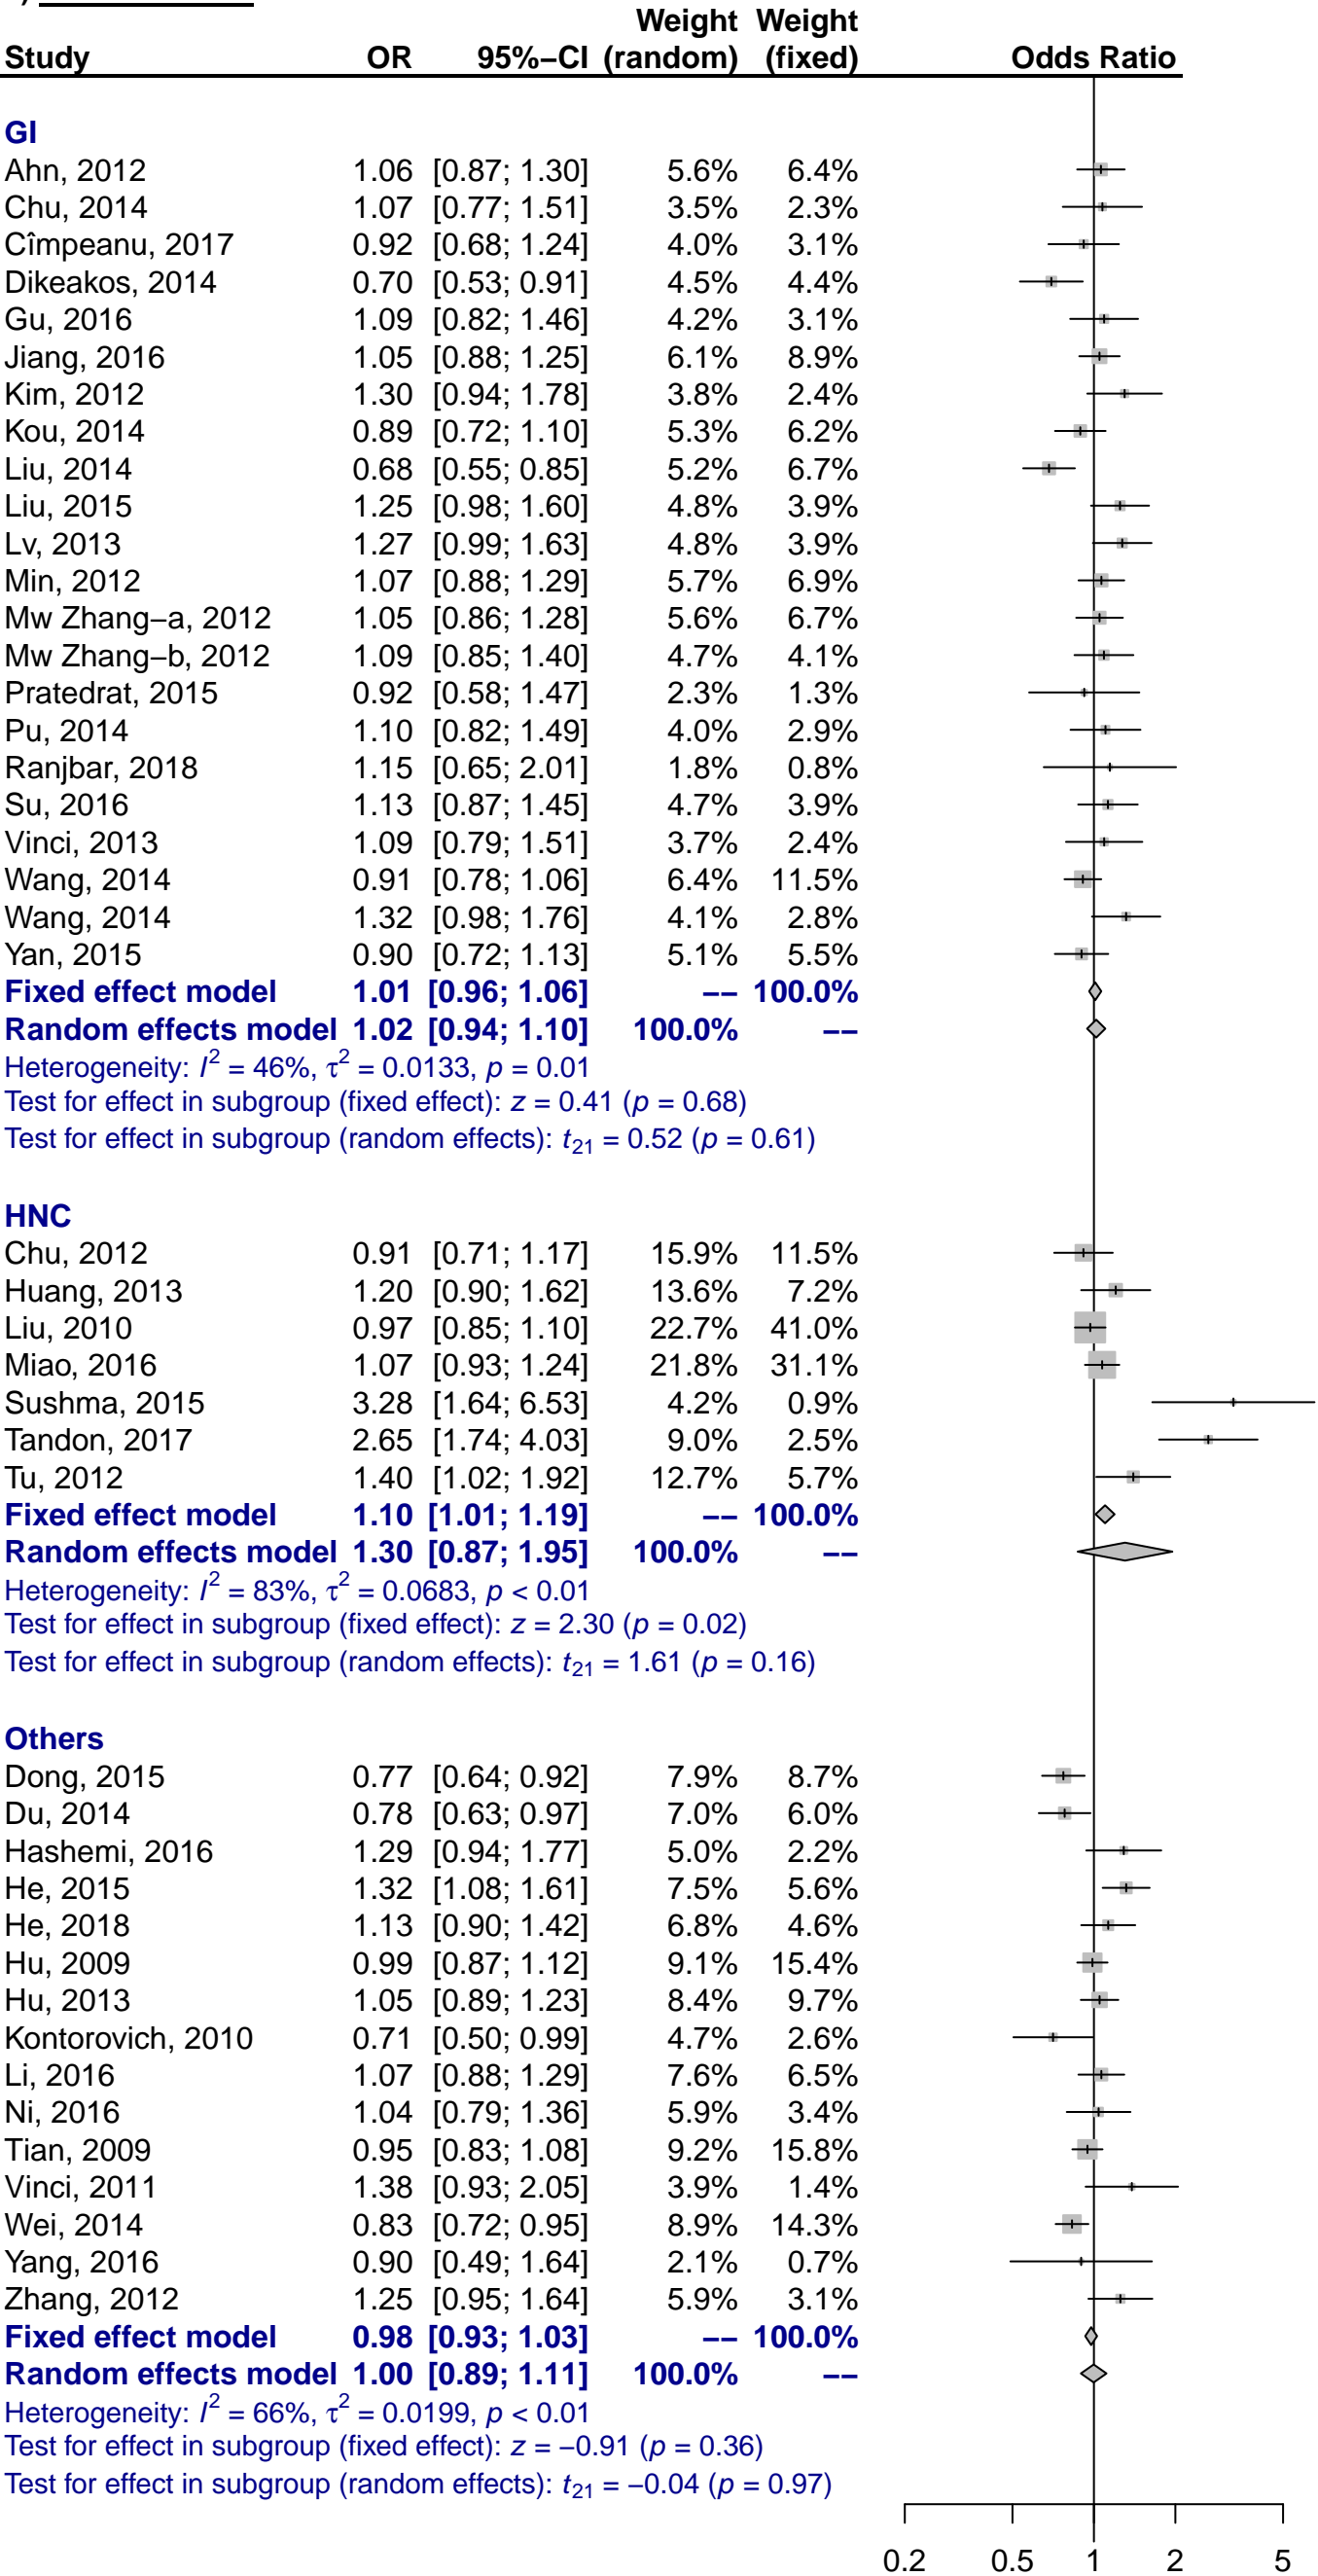

Supplement: Supplementary file 1 [file 14617067]
