# Supplementary material
Source: publisher figshare collection journal article supplement (https://frontiersin.figshare.com/ndownloader/files/14617067)

**Supplementary Figure S1.** Forest plots for association of miR-196a-2 rs11614913 and cancer risk under different genetic models. **A)** Homozygote comparison; **B)** Heterozygote comparison; **C)** Dominant comparison; **D)** Recessive comparison; **E)** Allele contrast

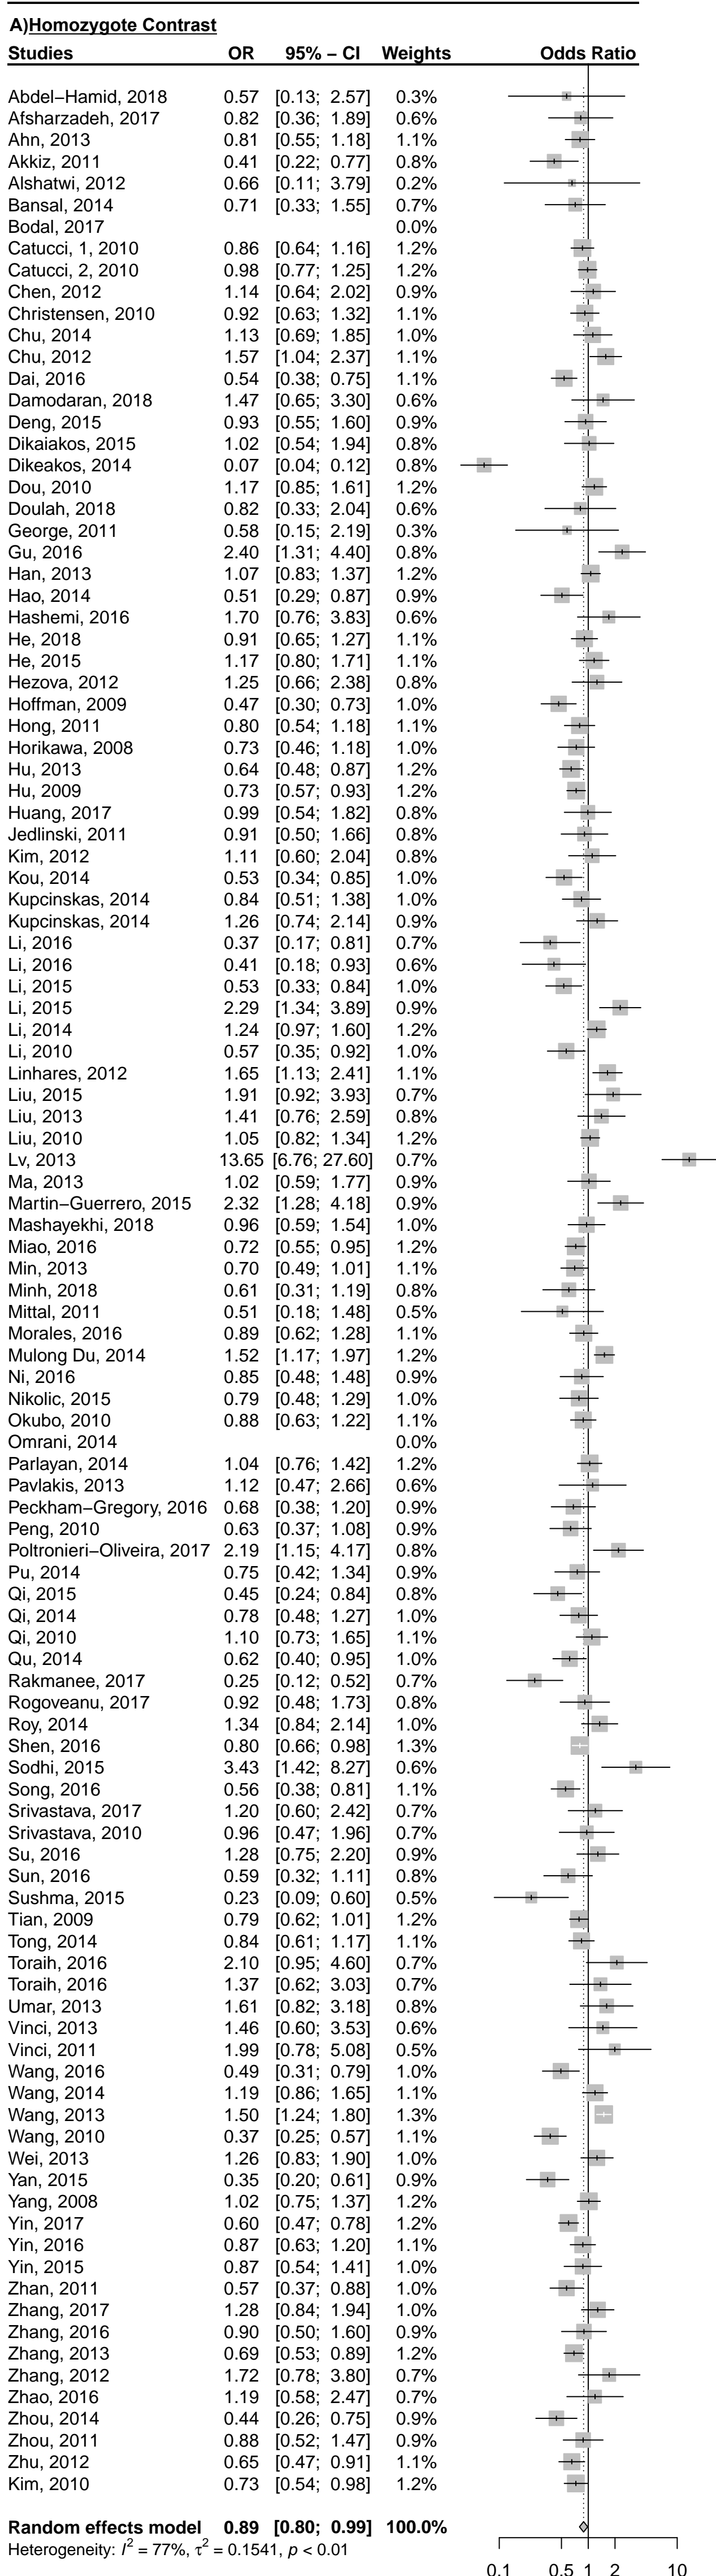

B) Heterozygote Contrast

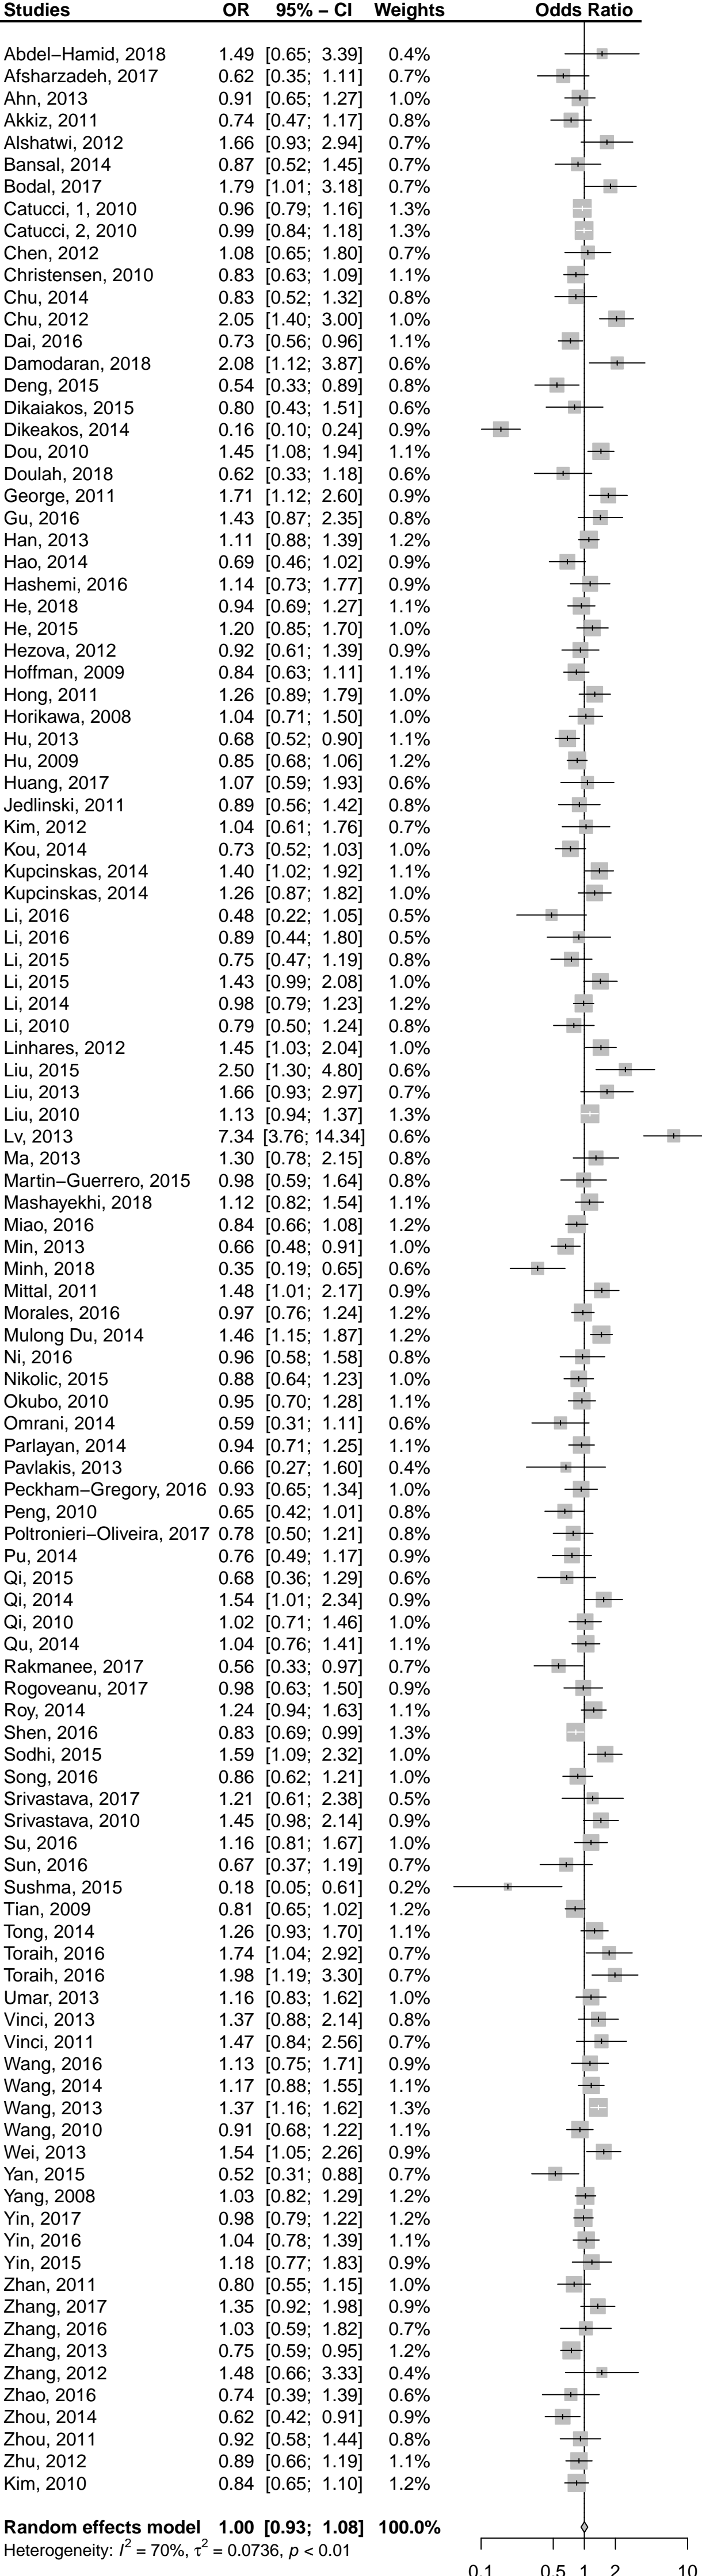

C) Dominant Model

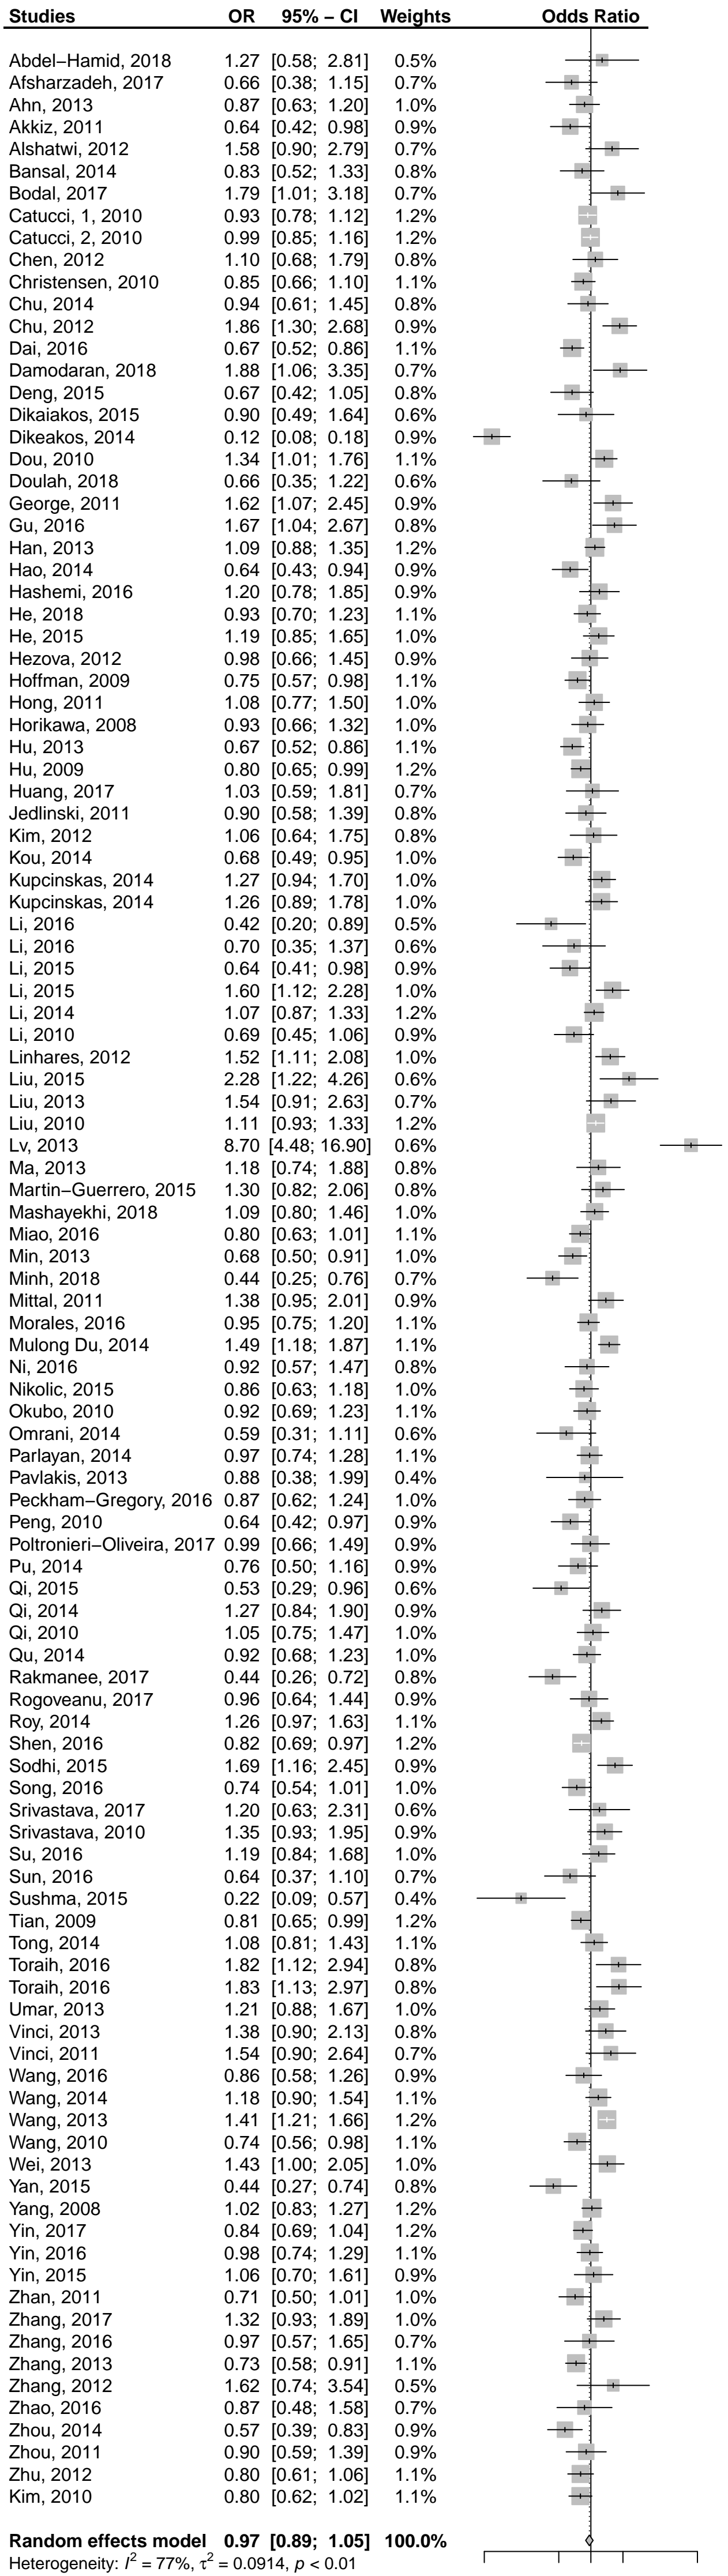

D) Recessive Model

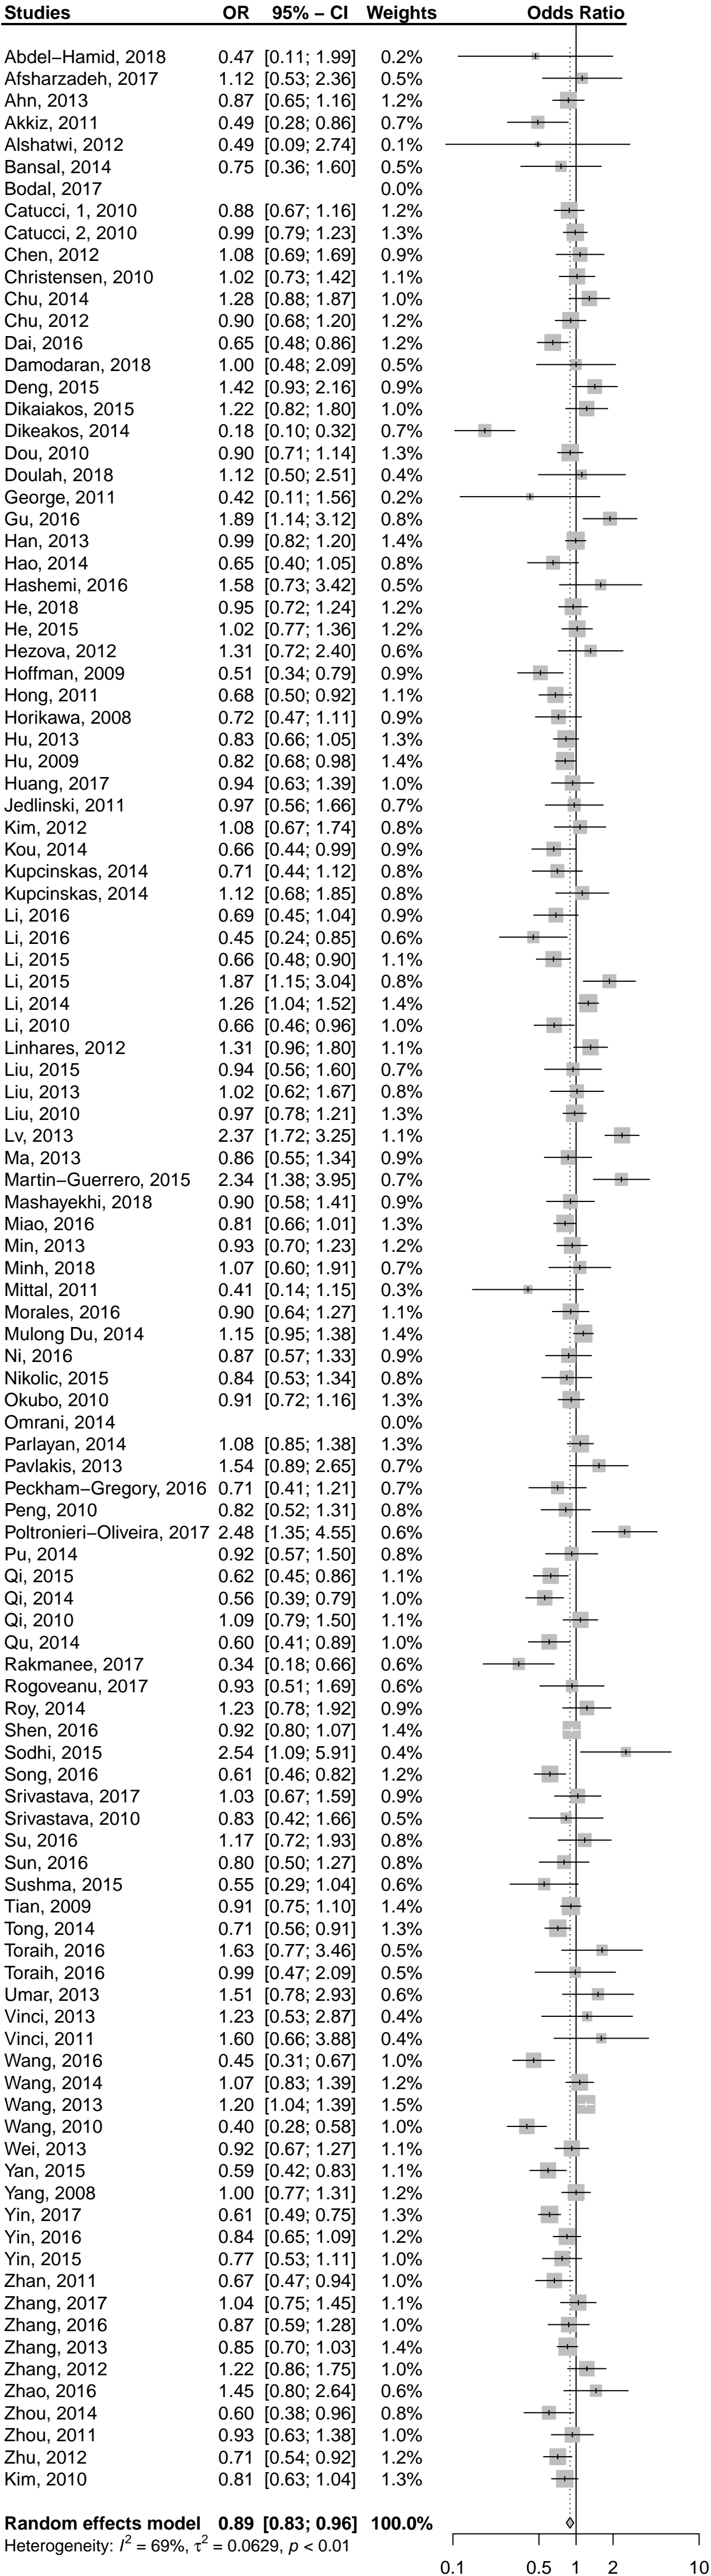

E) Allele Contrast

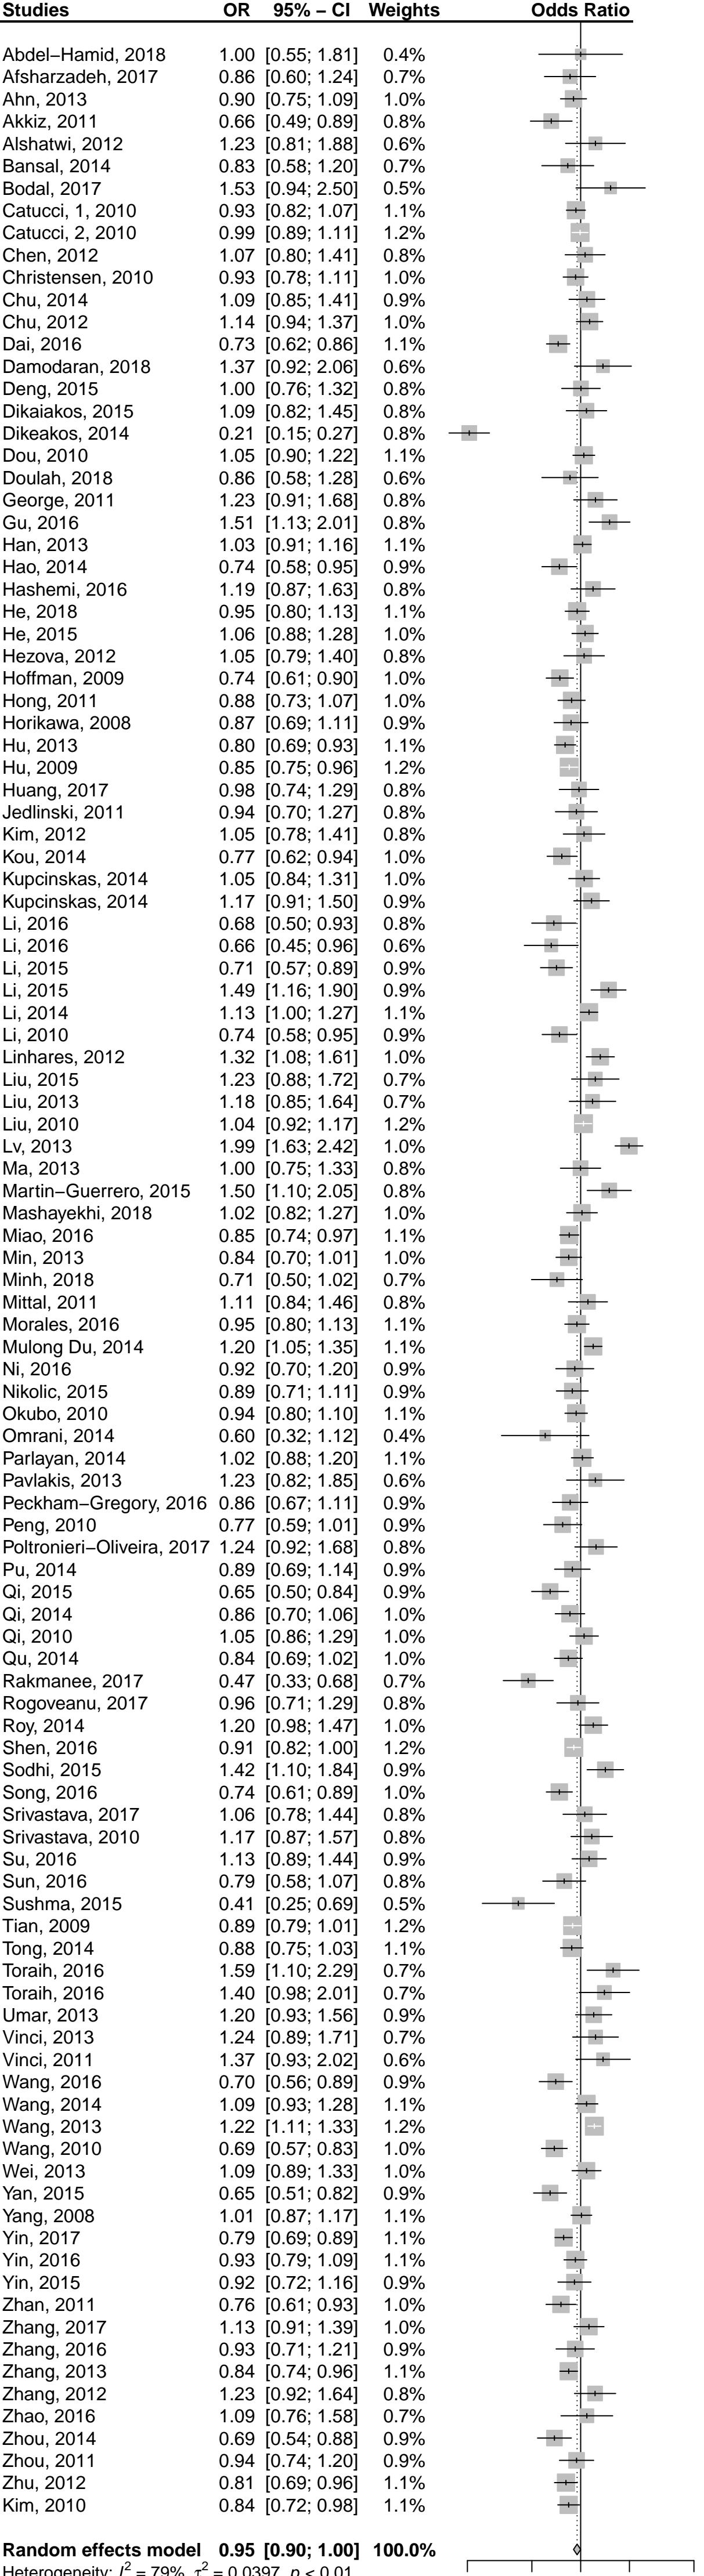

Supplement: Supplementary file 3 [file 14617067]
