# Supplementary material
Source: publisher figshare collection journal article supplement (https://frontiersin.figshare.com/ndownloader/files/14617067)

**Supplementary Figure S3.** Forest plots for subgroup meta-analysis of miR-196a-2 rs11614913 according to cancer types. **A)** Homozygote comparison; **B)** Heterozygote comparison; **C)** Dominant comparison; **D)** Recessive comparison; **E)** Allele contrast. **Abbreviations:** BC: breast cancer; HCC: Hepatocellular cancer; GC: gastric cancer; CRC: colorectal cancer; LC: lung cancer; BIC: bladder cancer; PC: prostate cancer; OC: Oral cancer; OvC: ovarian cancer; ESCC: esophageal squamous cell carcinoma

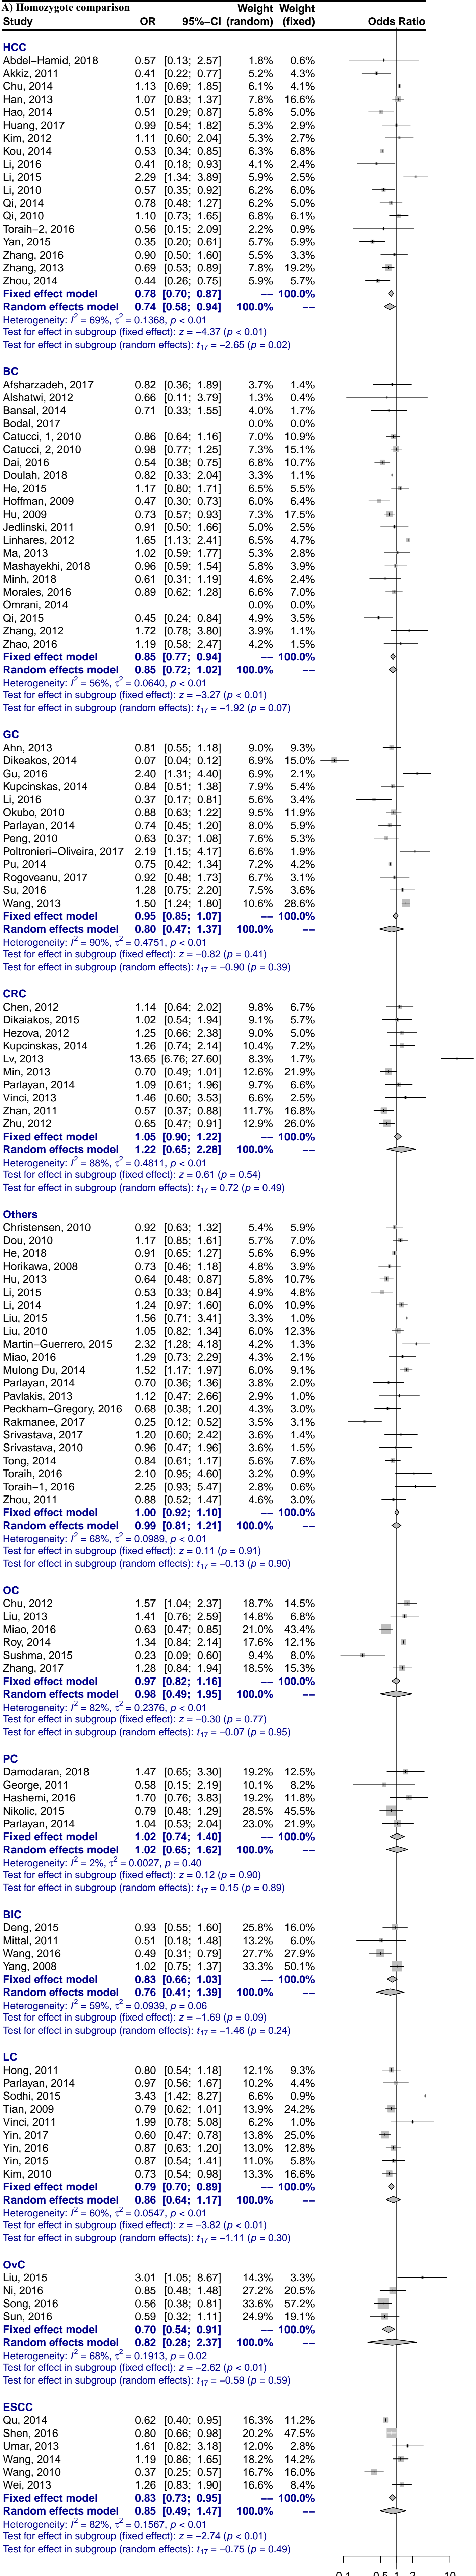



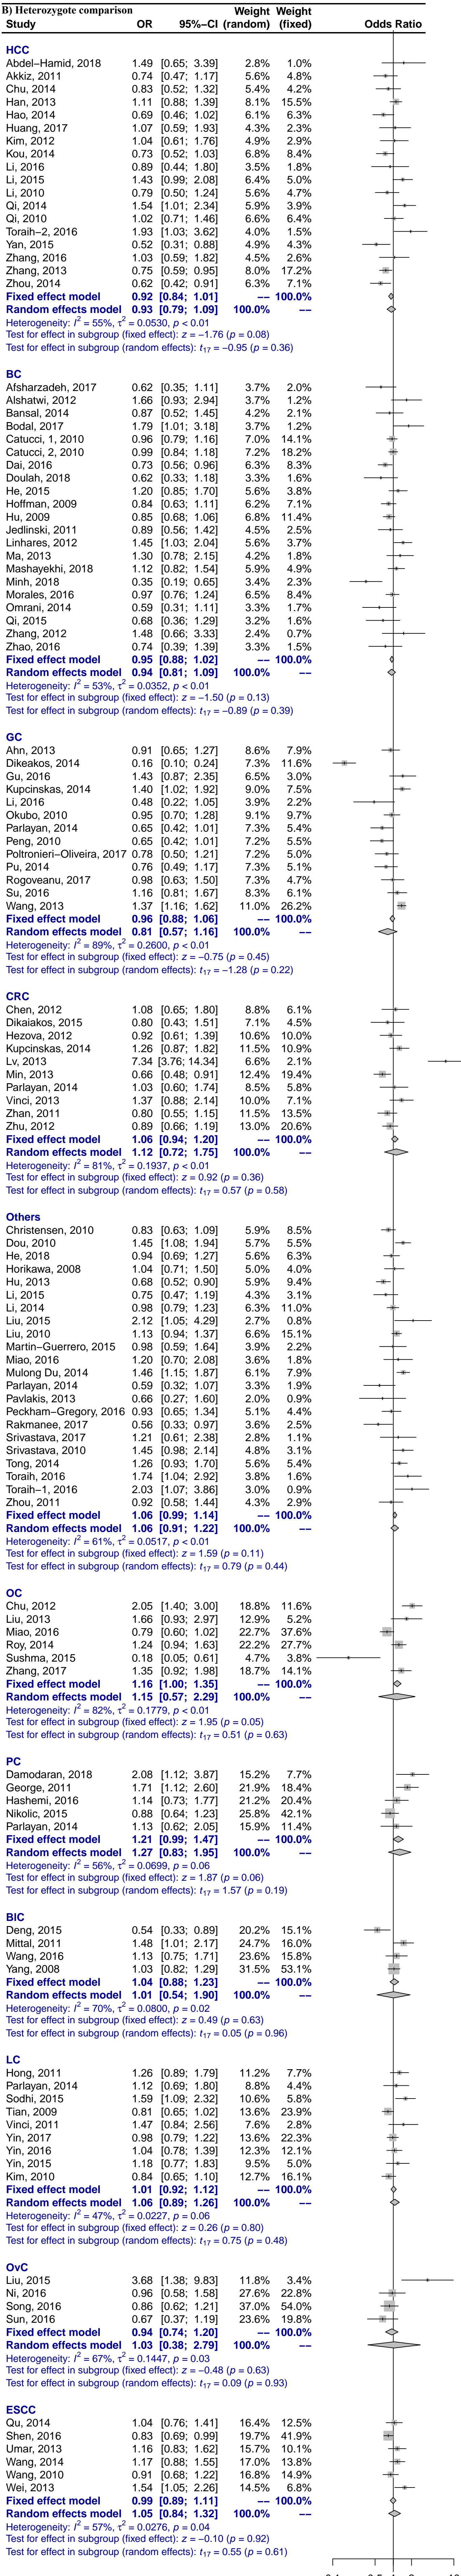



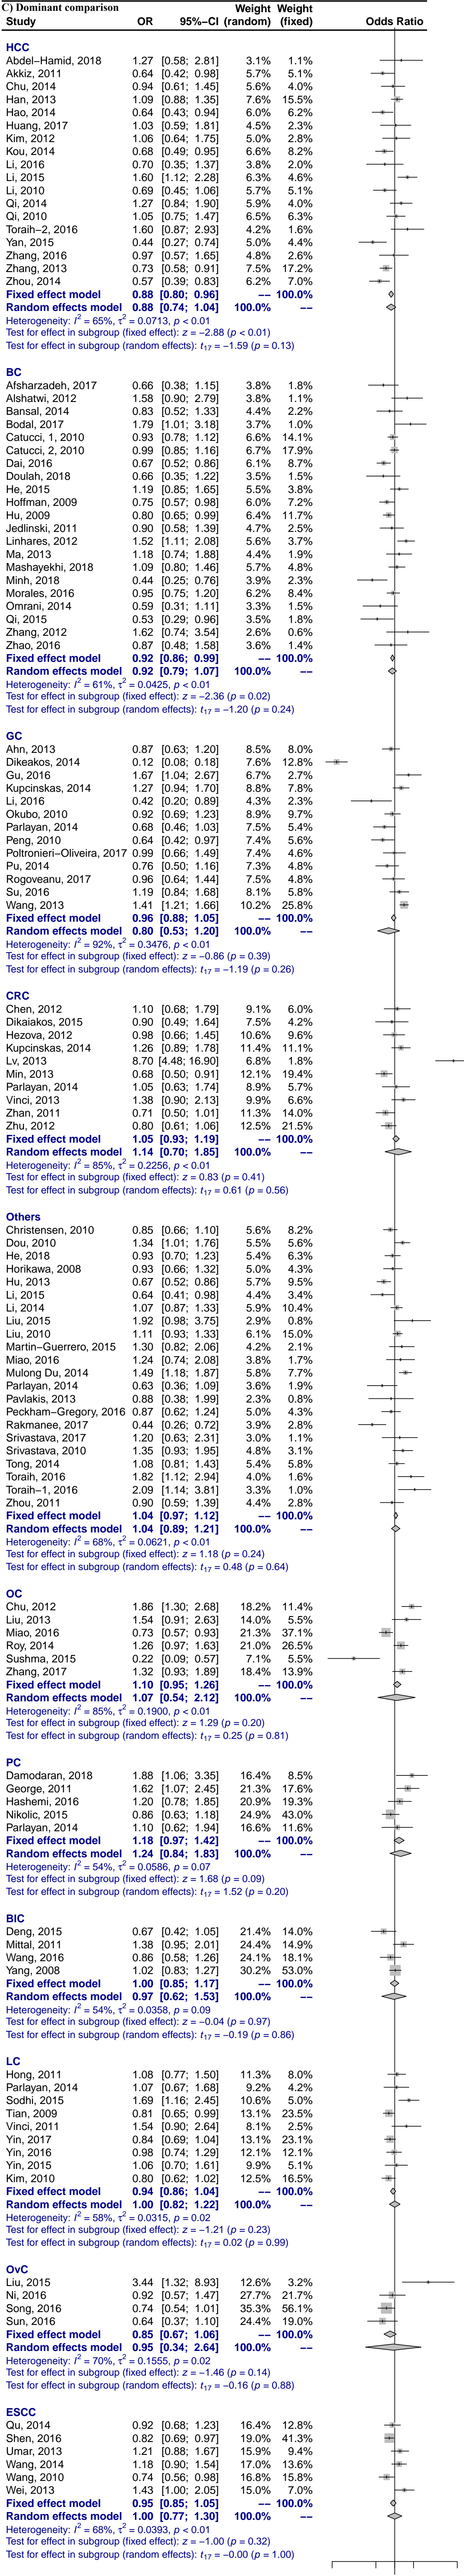



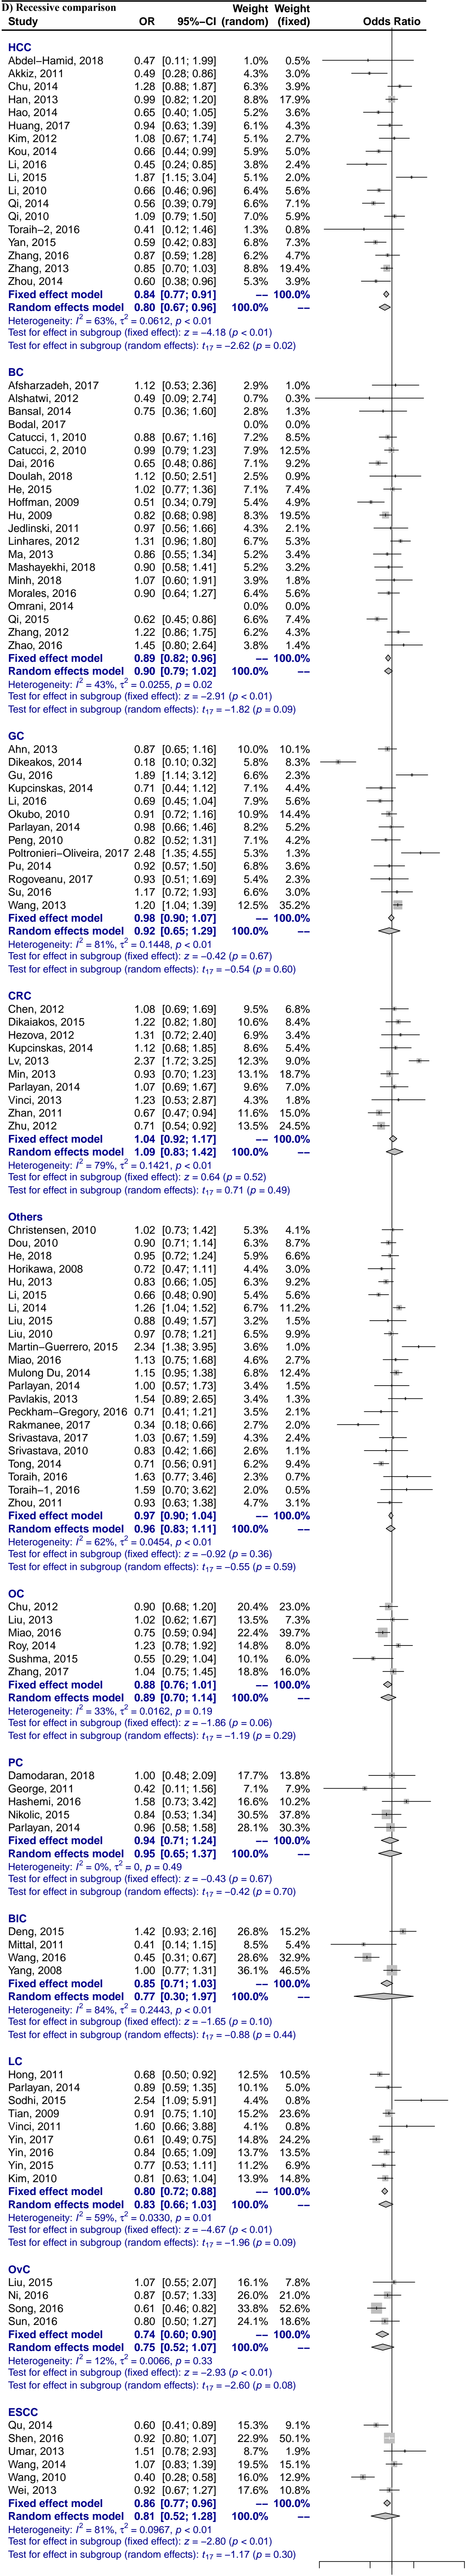



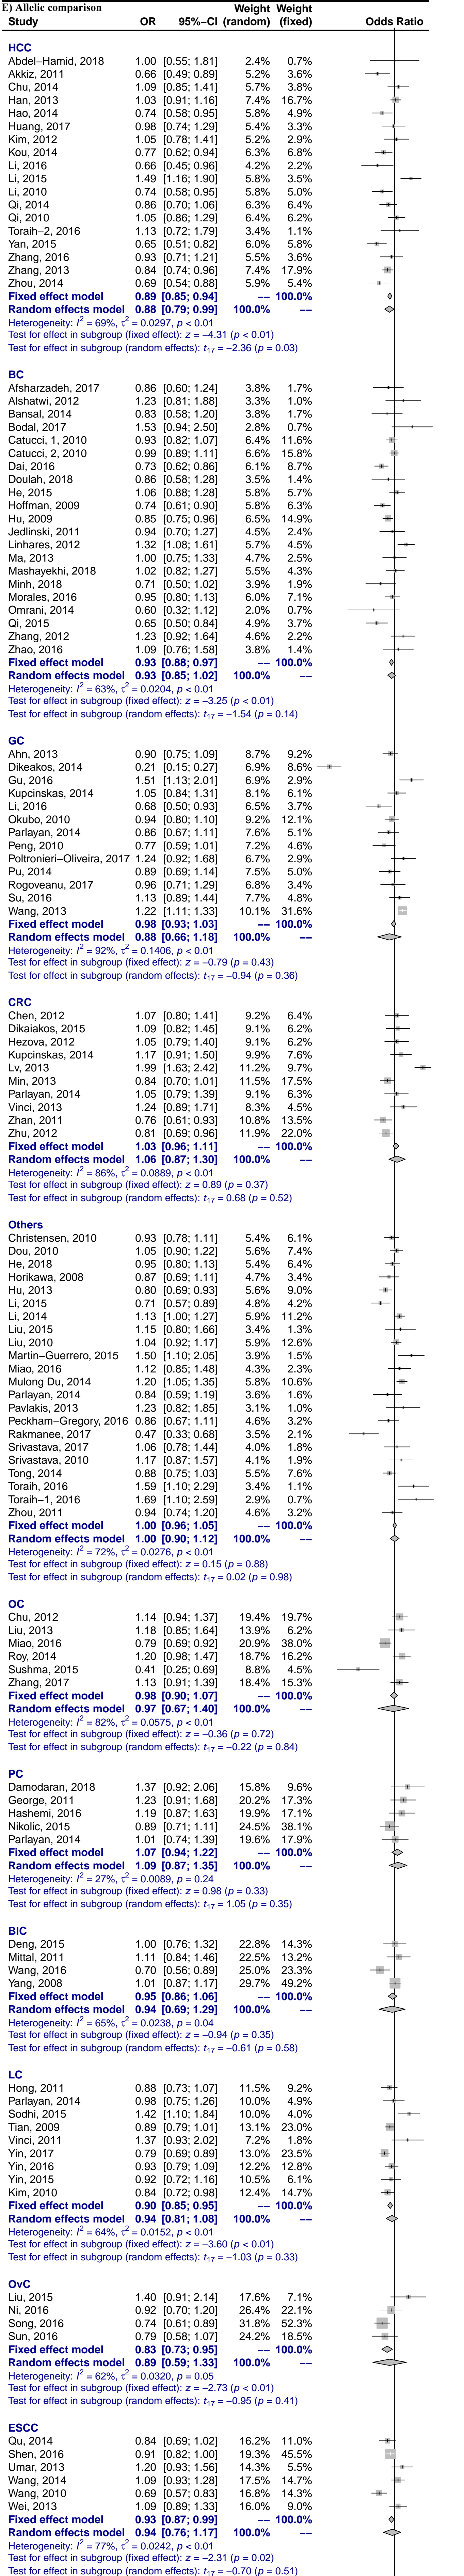

Supplement: Supplementary file 6 [file 14617067]
