# Supplementary material
Source: publisher figshare collection journal article supplement (https://frontiersin.figshare.com/ndownloader/files/14617067)

**Supplementary Figure S9.** Sensitivity analyses for meta-analysis of miR-149 rs2292832 and cancer risk under different genetic models in order to detect potential influential studies using leave-one-out approach. **A)** Homozygote contrast using trim & fill (TAF) approach; **B)** Homozygote contrast using original studies; **C)** Heterozygote; **D)** Dominant model; **E)** Recessive model using trim & fill approach **F)** Recessive model using original studies; **G)** allele contrast using trim & fill approach; **H)** Allele contrast using original studies. Each line represents the overall estimate while omitting one study

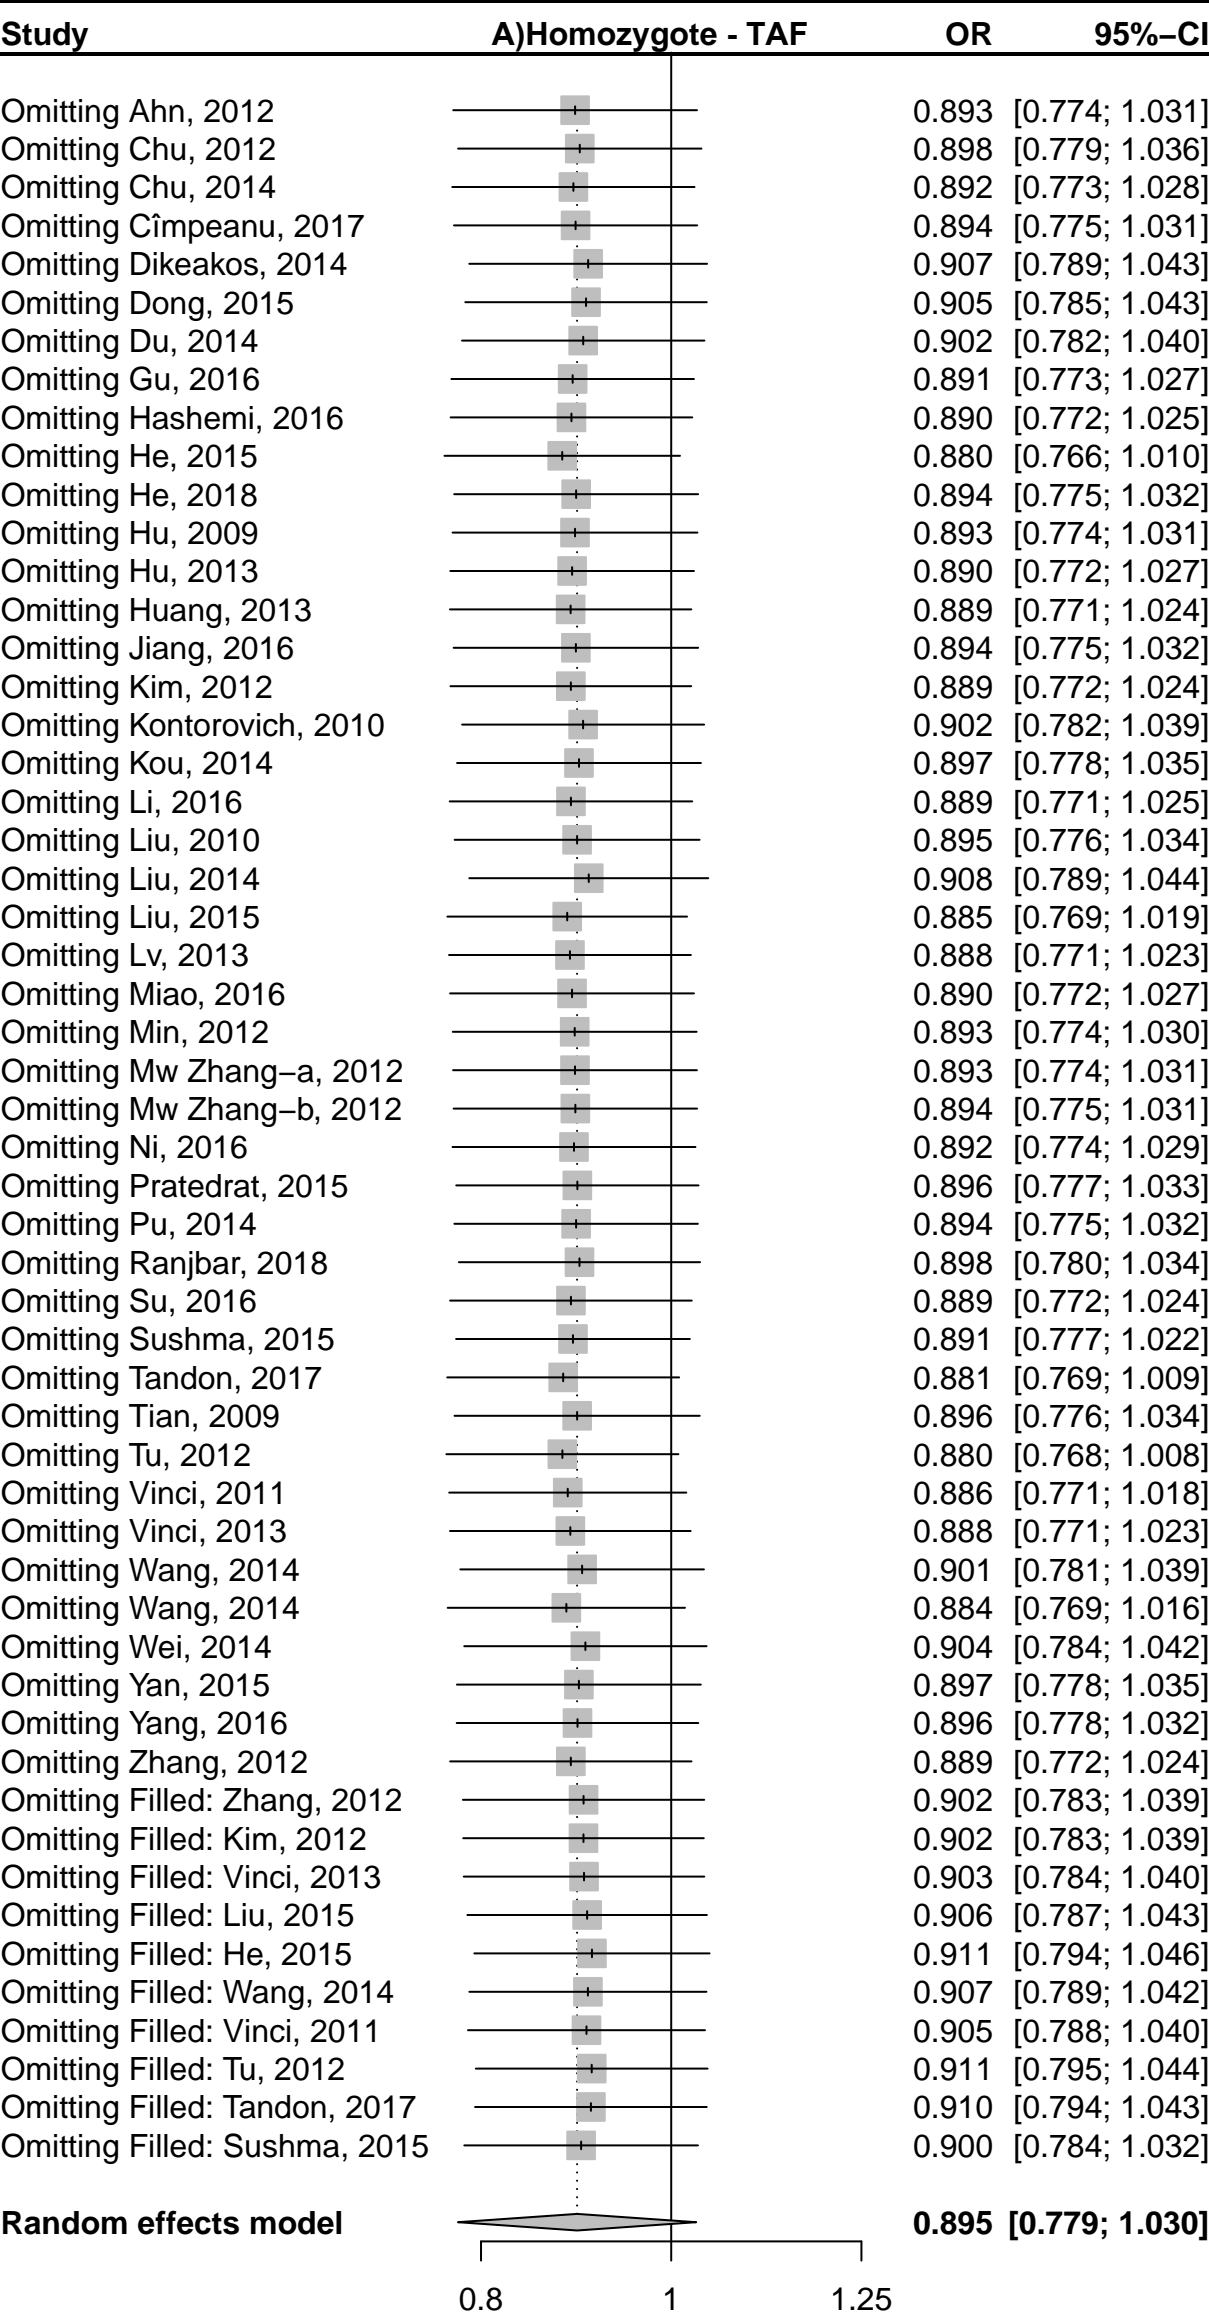

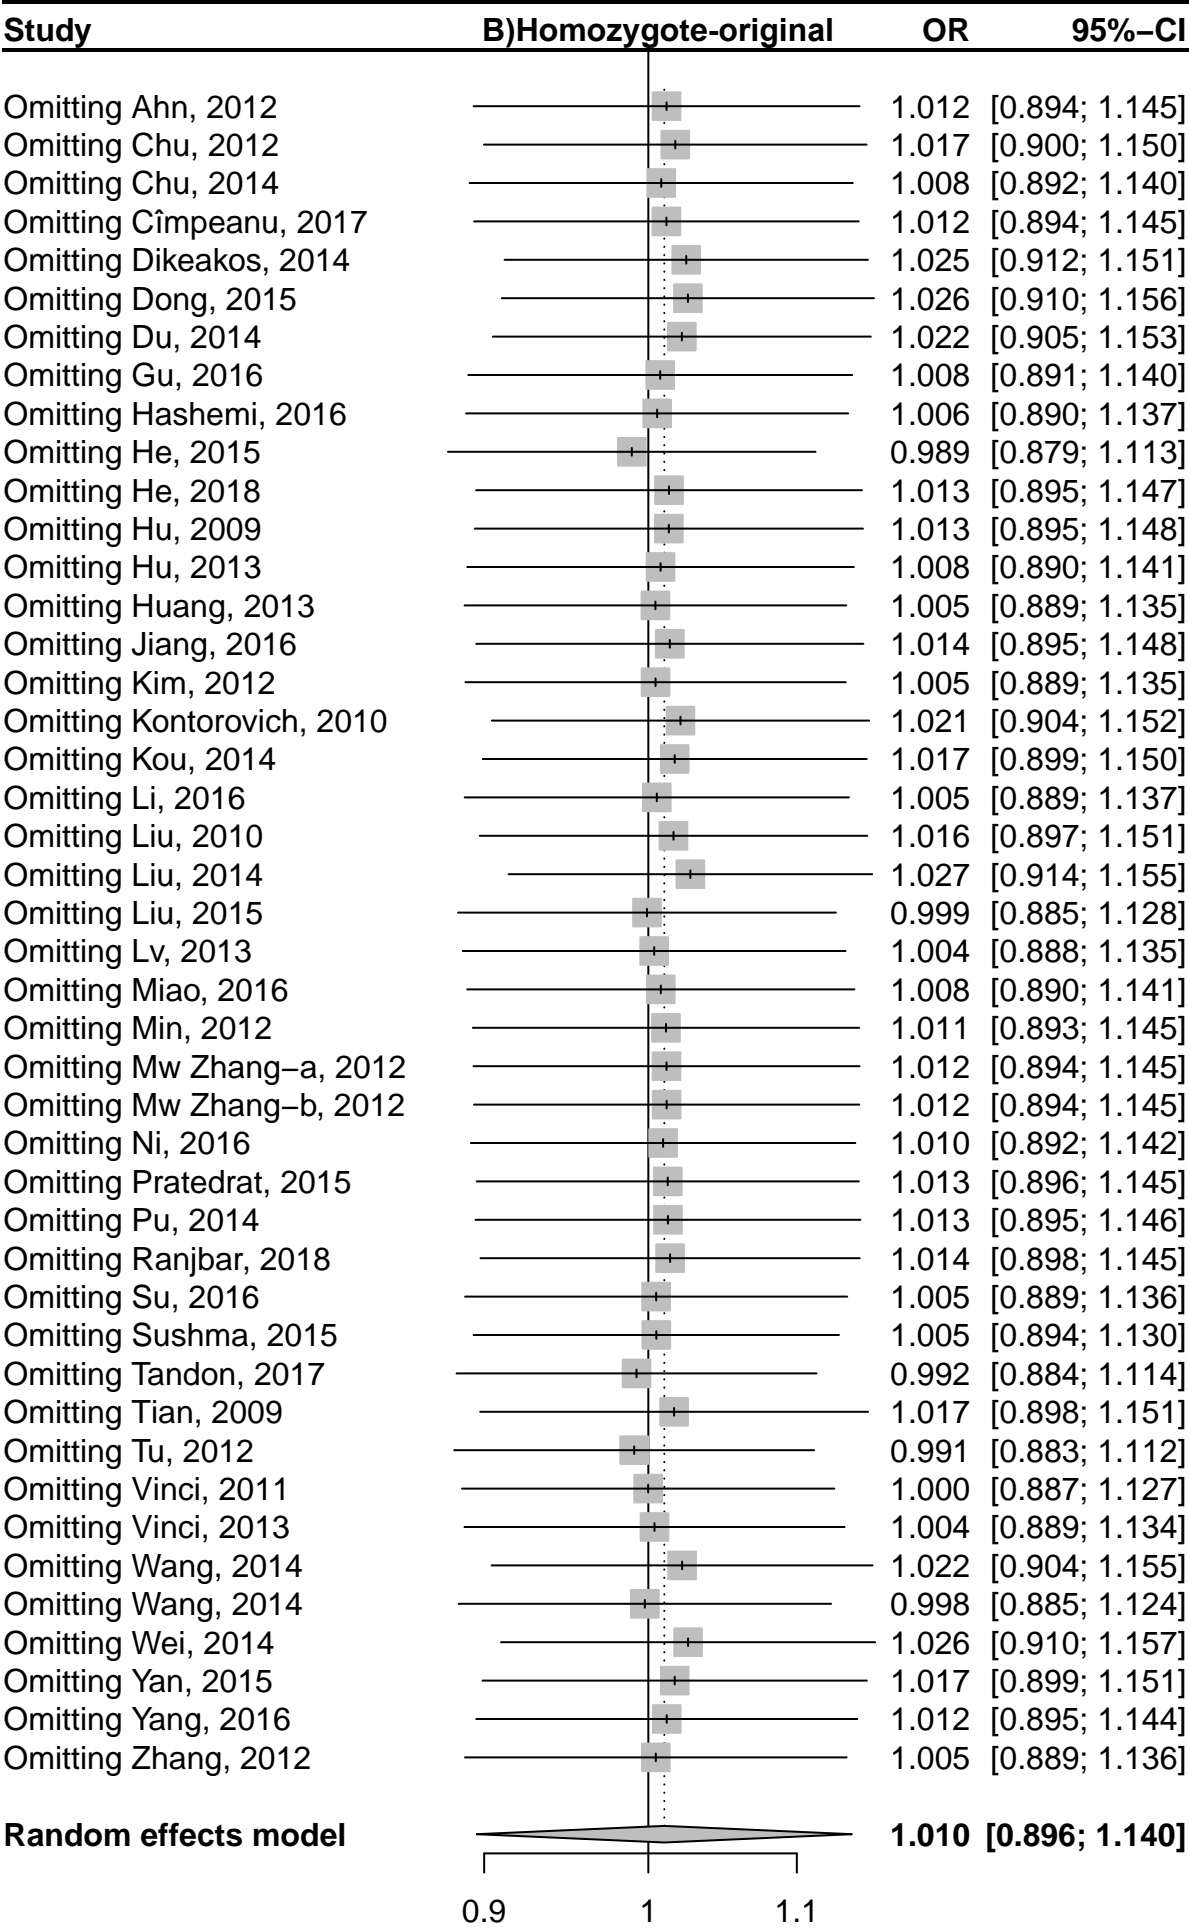

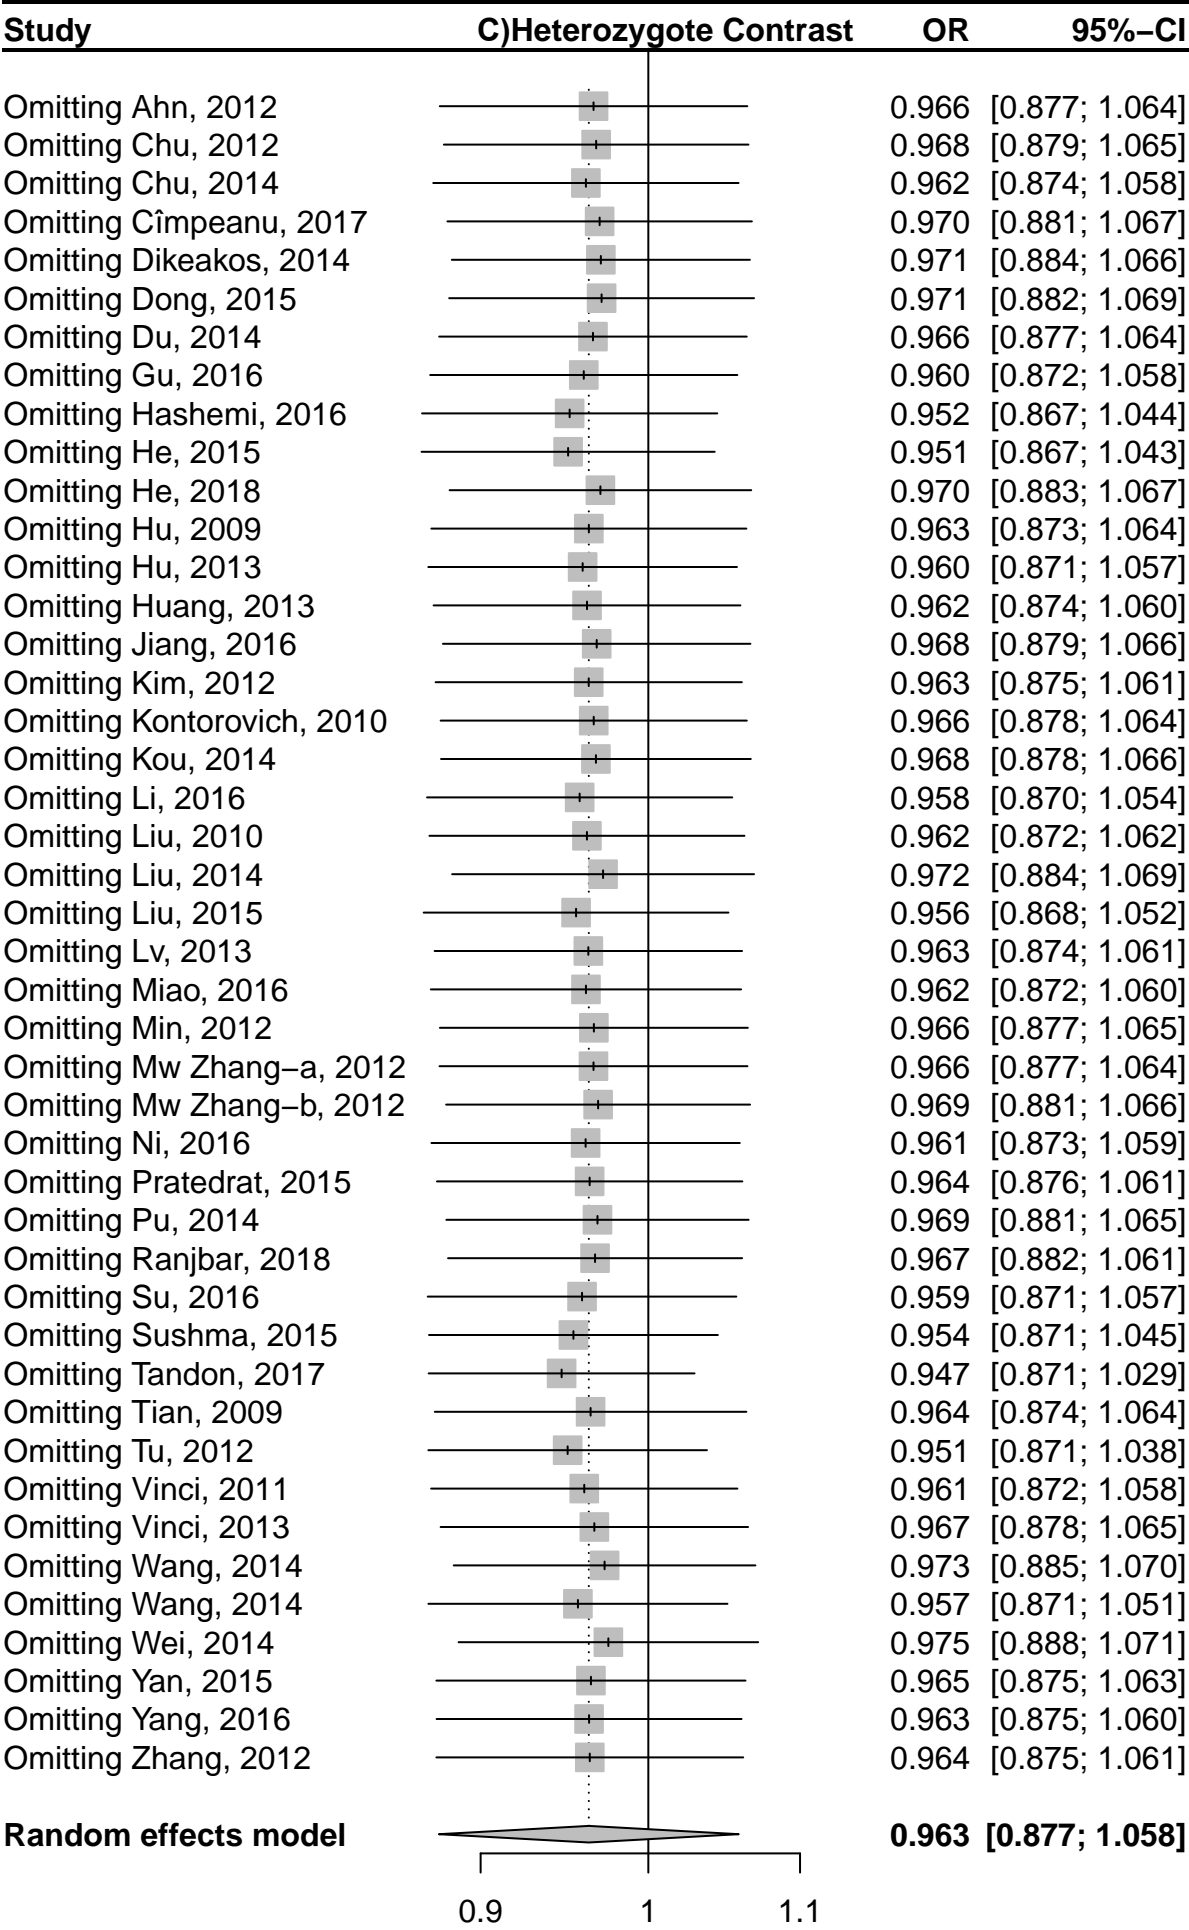

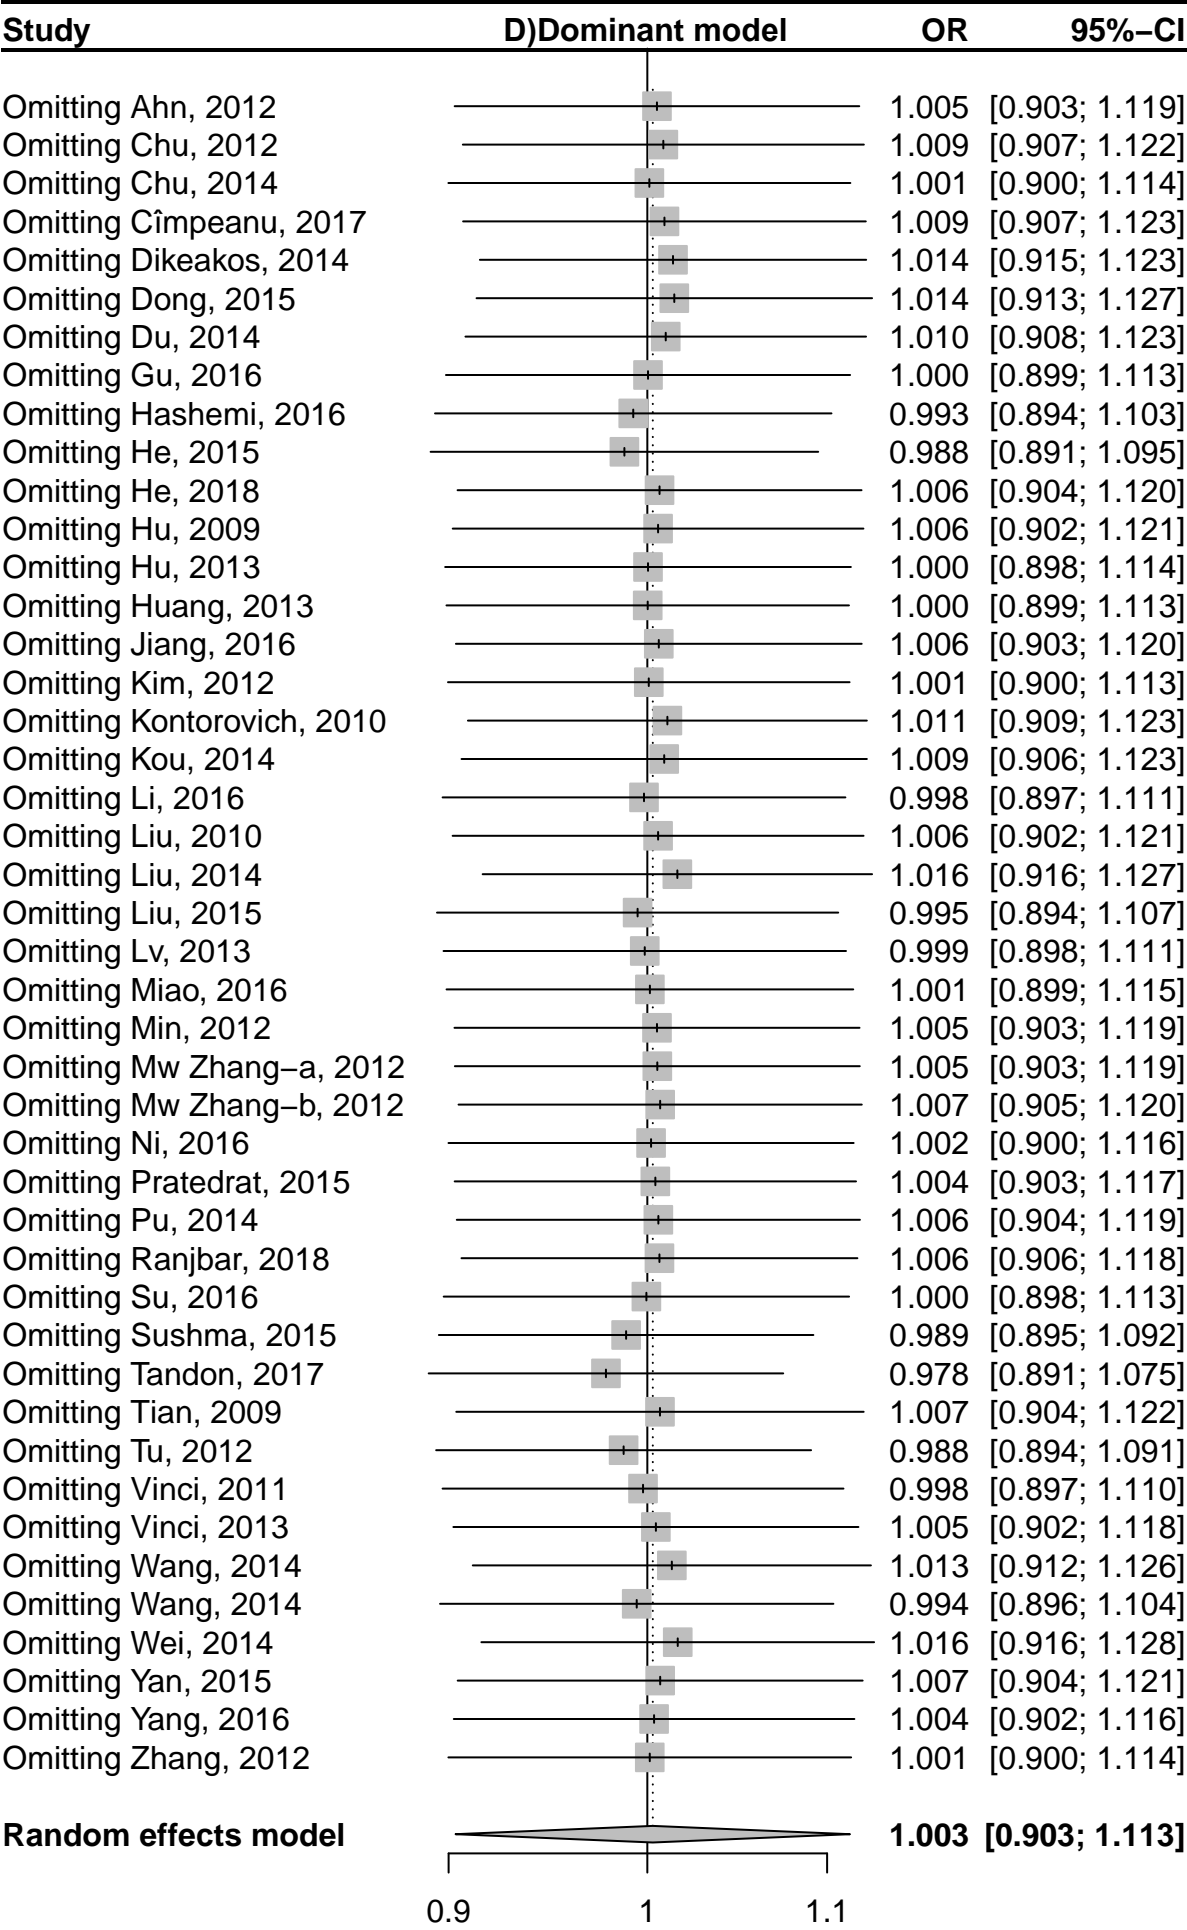

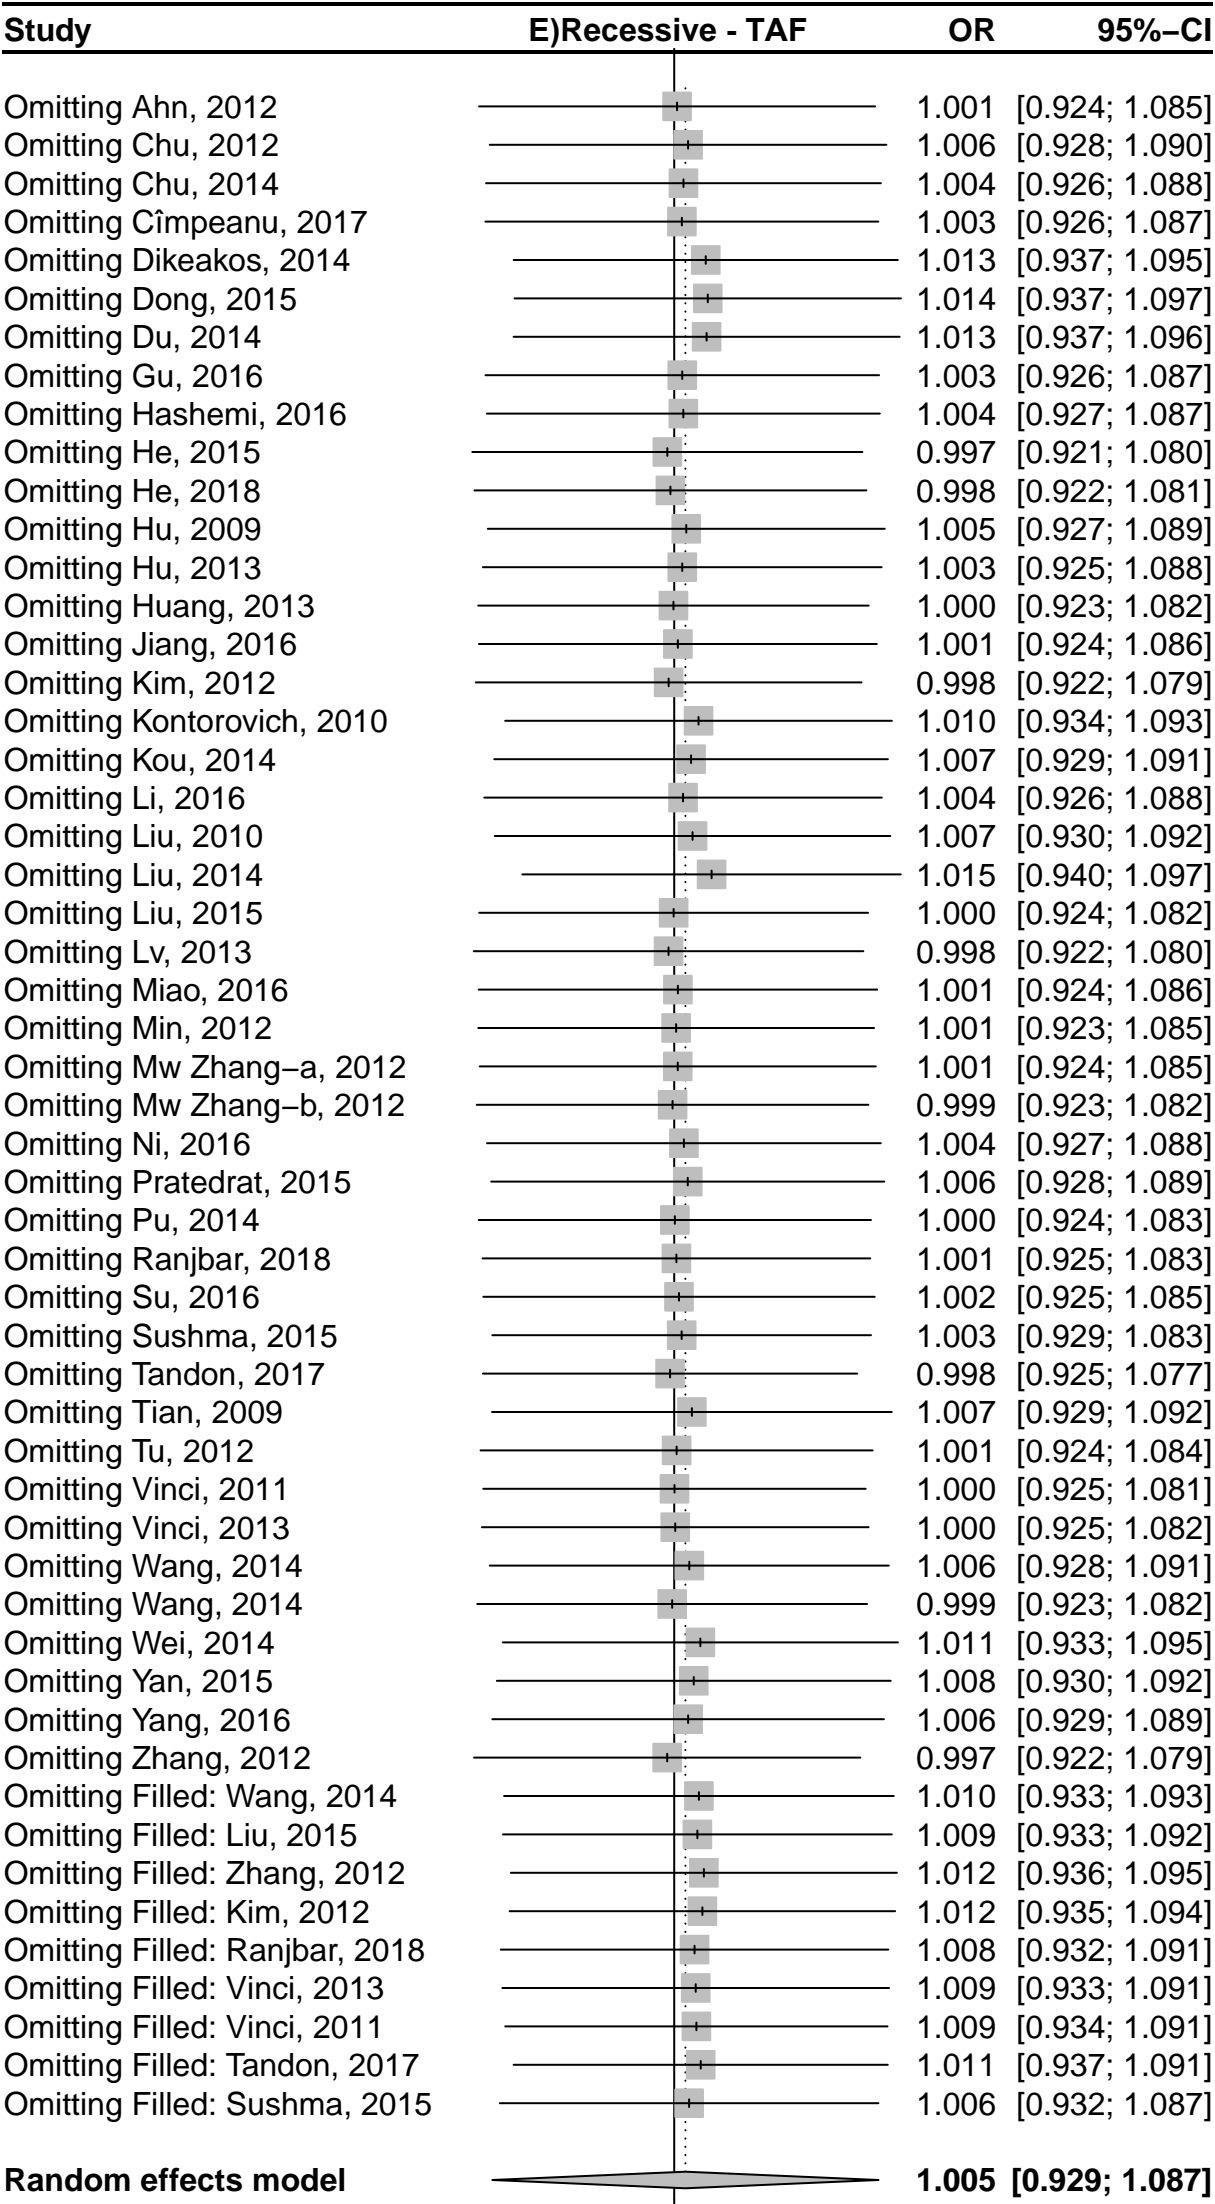

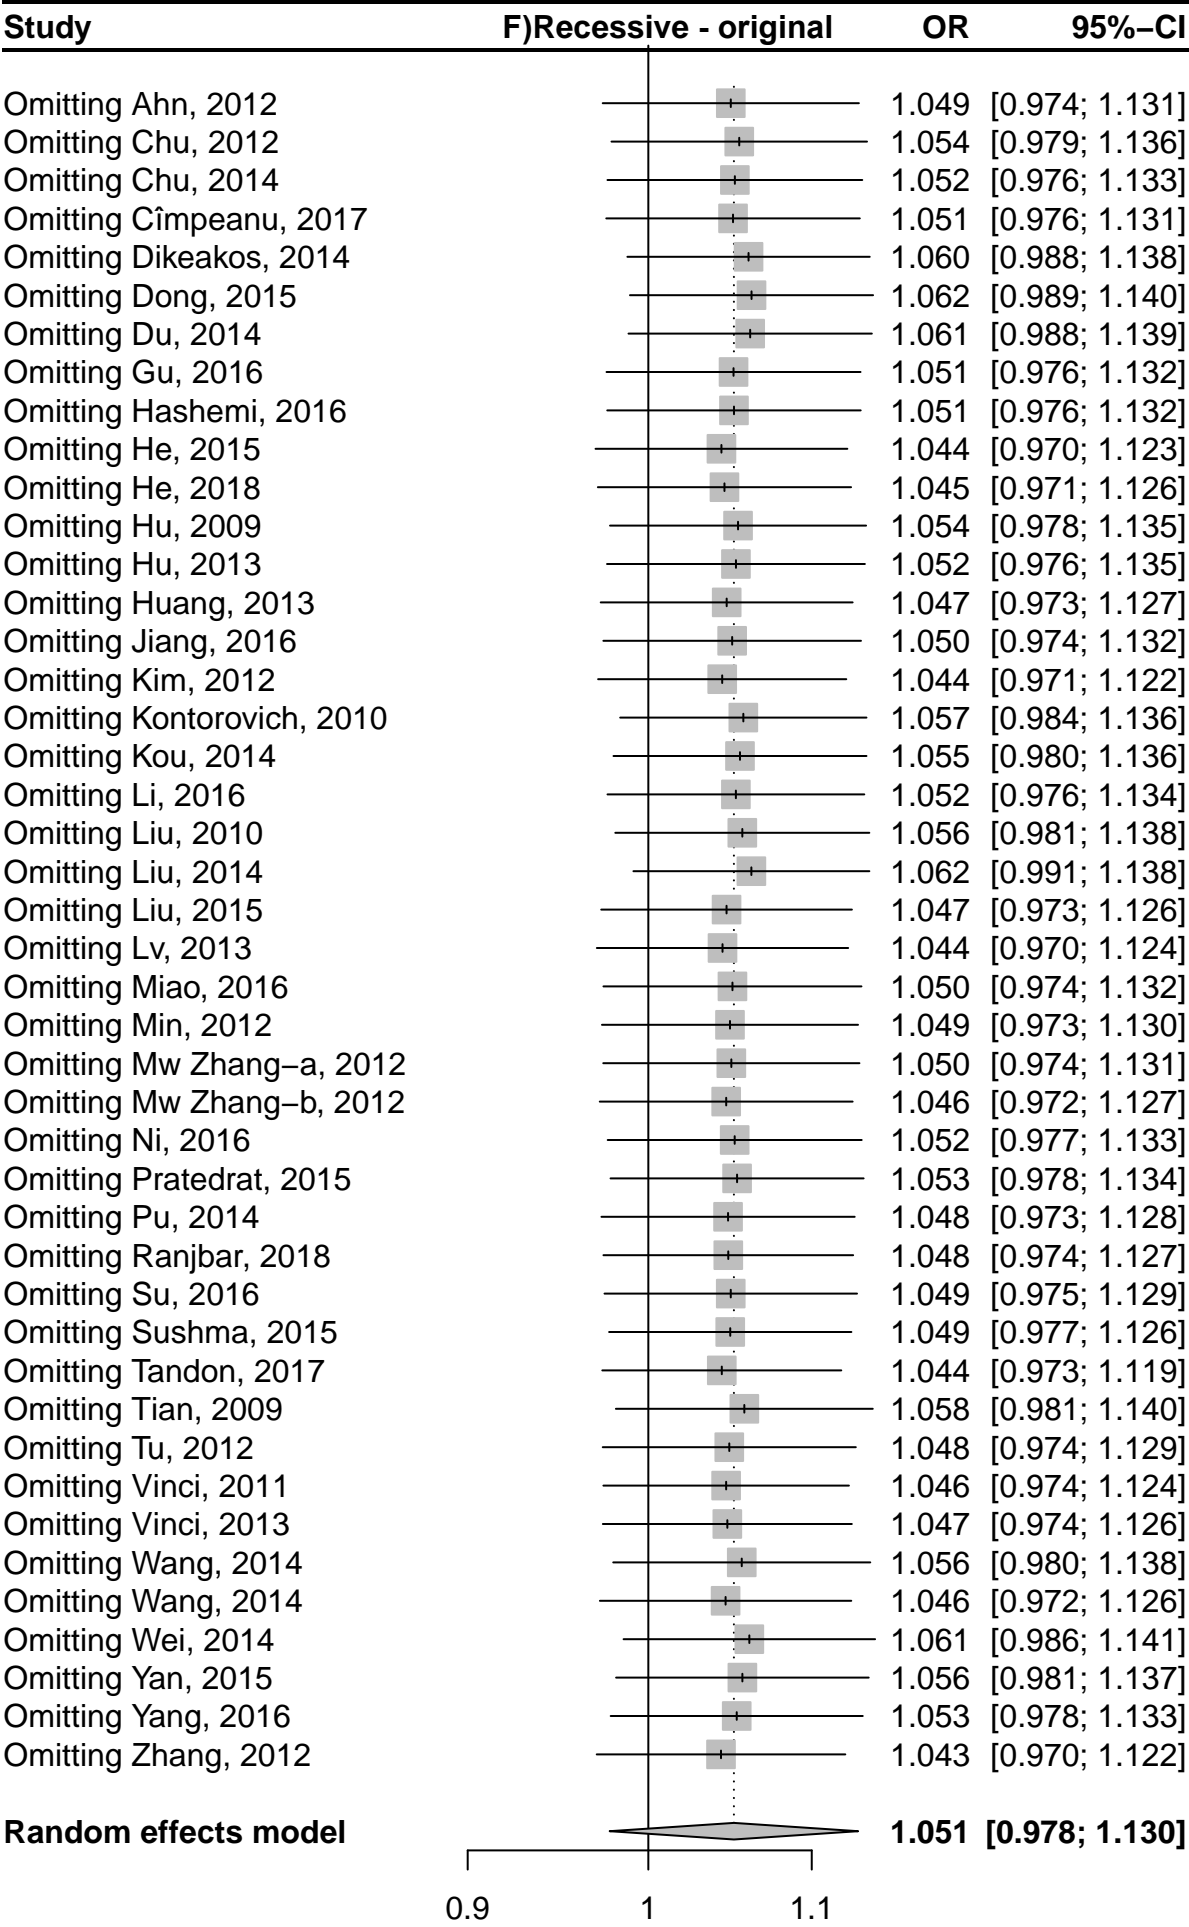

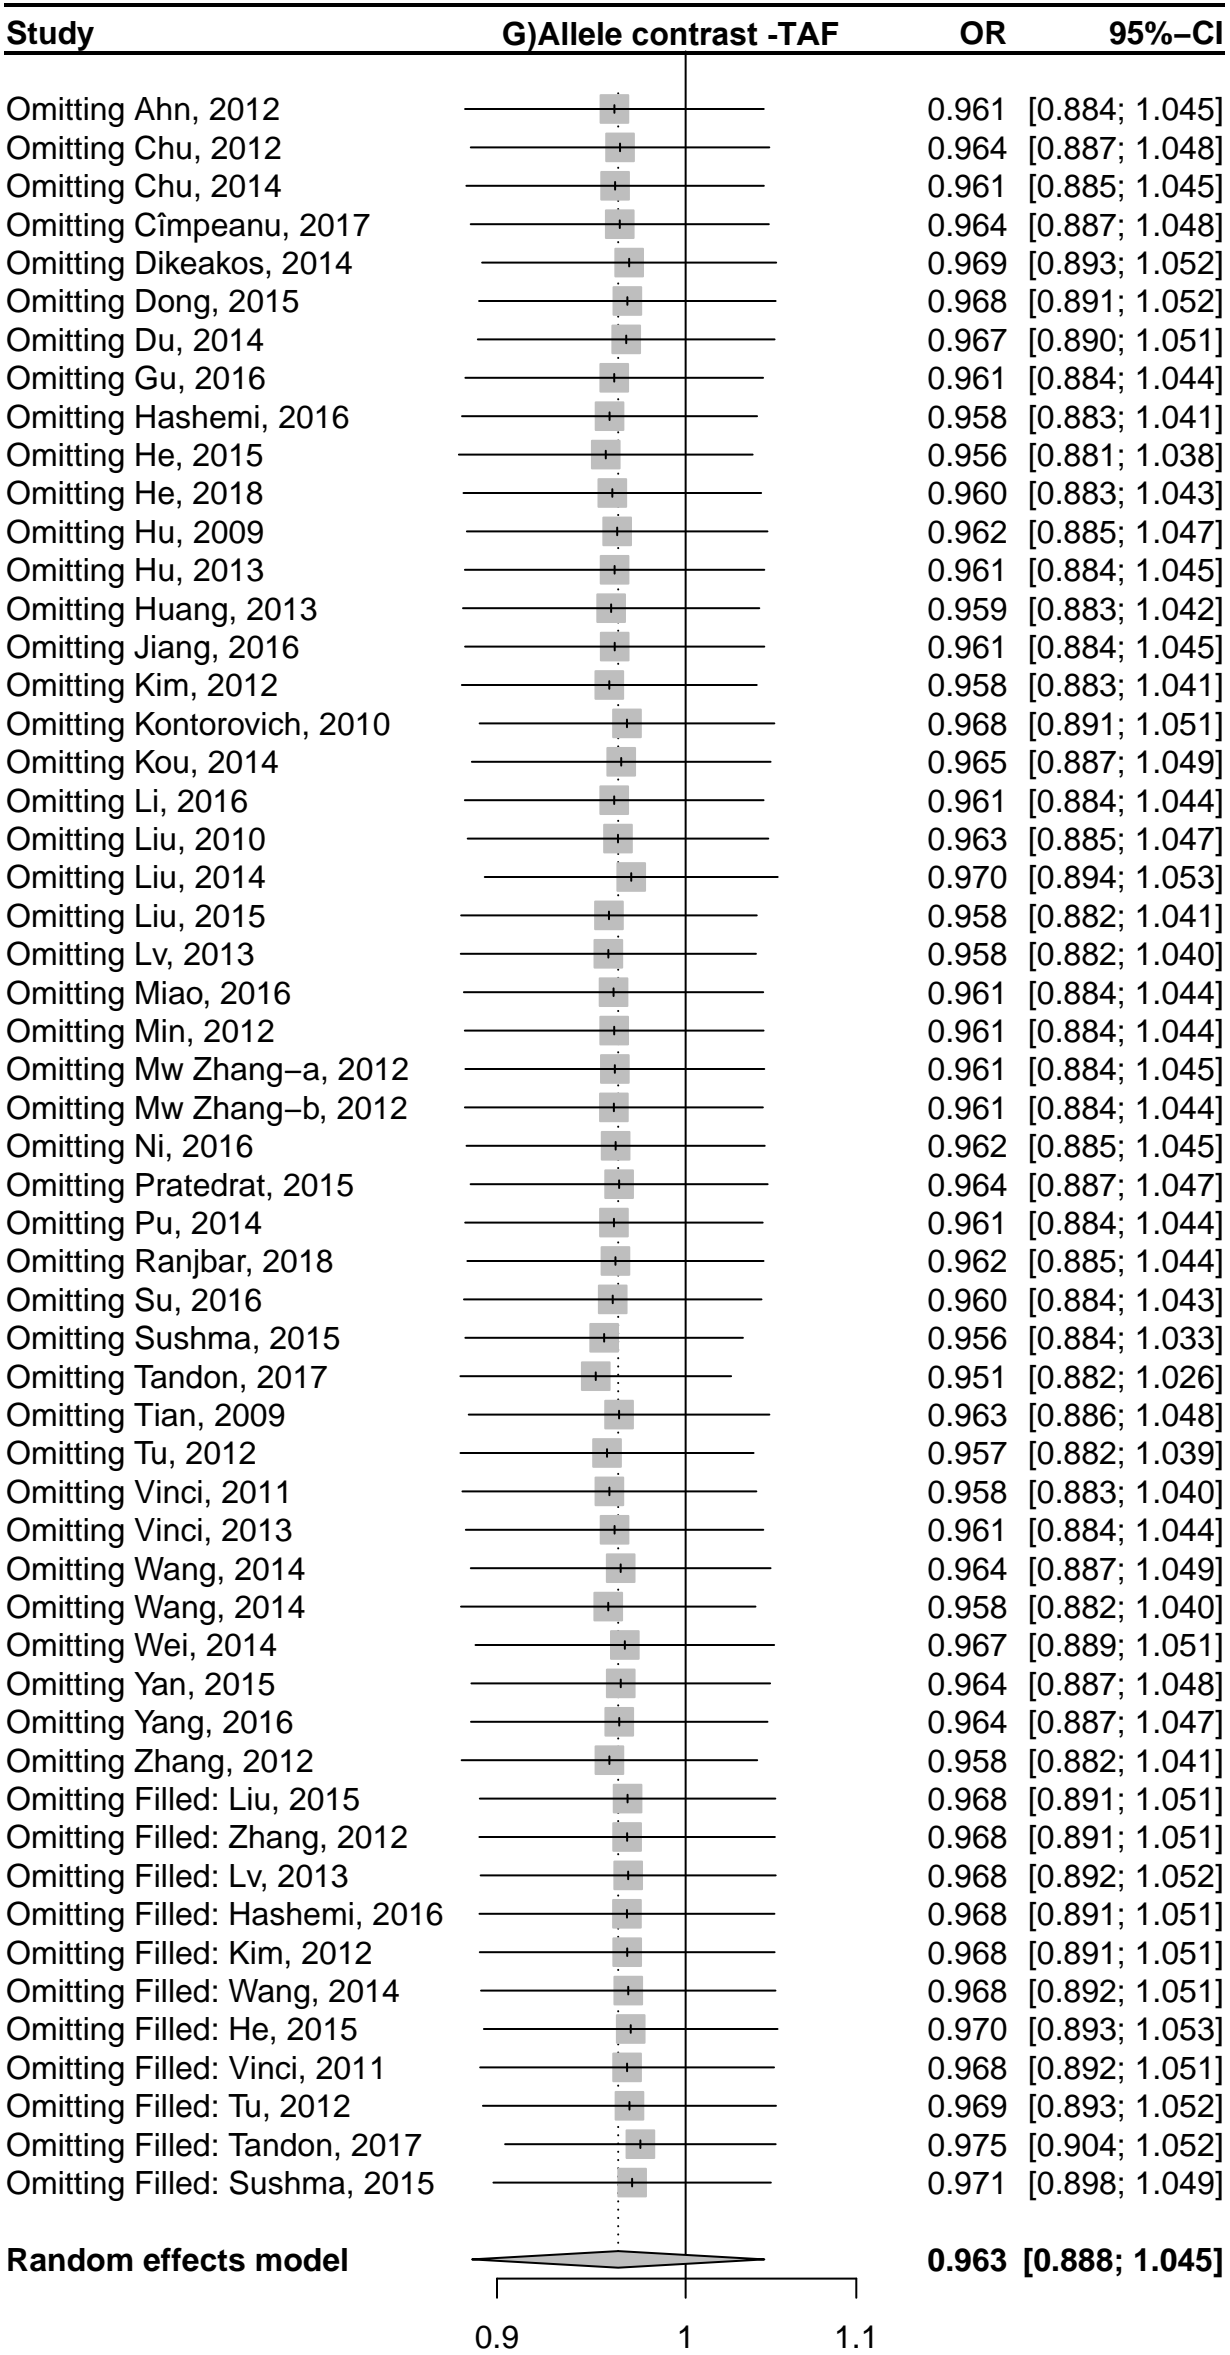

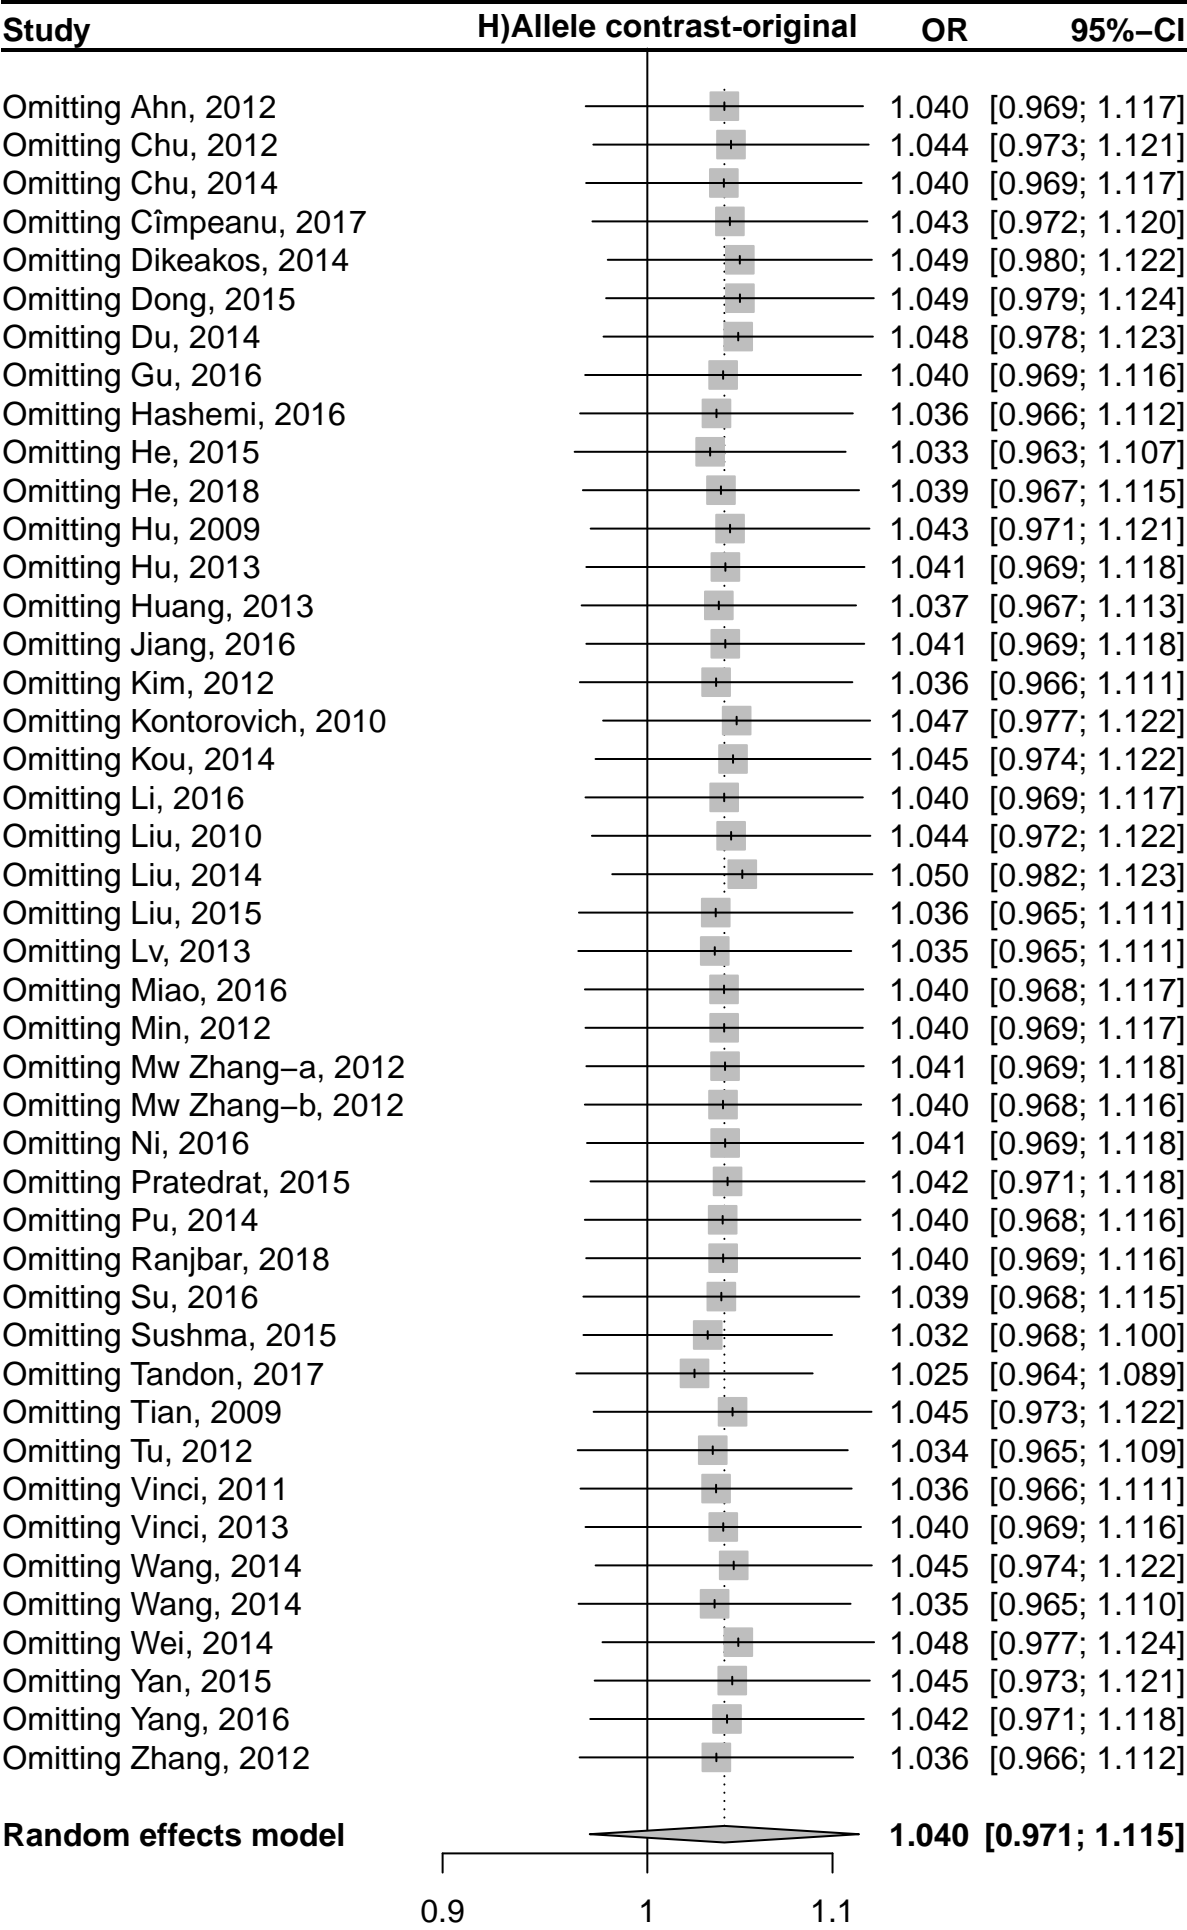

Supplement: Supplementary file 7 [file 14617067]
