# Supplementary material
Source: publisher figshare collection journal article supplement (https://frontiersin.figshare.com/ndownloader/files/14617067)

**Supplementary Figure S2.** Forest plots for subgroup meta-analysis of miR-196a-2 rs11614913 according to the broad cancer category. **A)** Homozygote comparison; **B)** Heterozygote comparison; **C)** Dominant comparison; **D)** Recessive comparison; **E)** Allele contrast. **Abbreviations:** GI: cancers of digestive system; HNC: Head and neck carcinoma; GyC: Gynecologic cancers; HM: Hematological malignancies; UG: Urogenital cancers

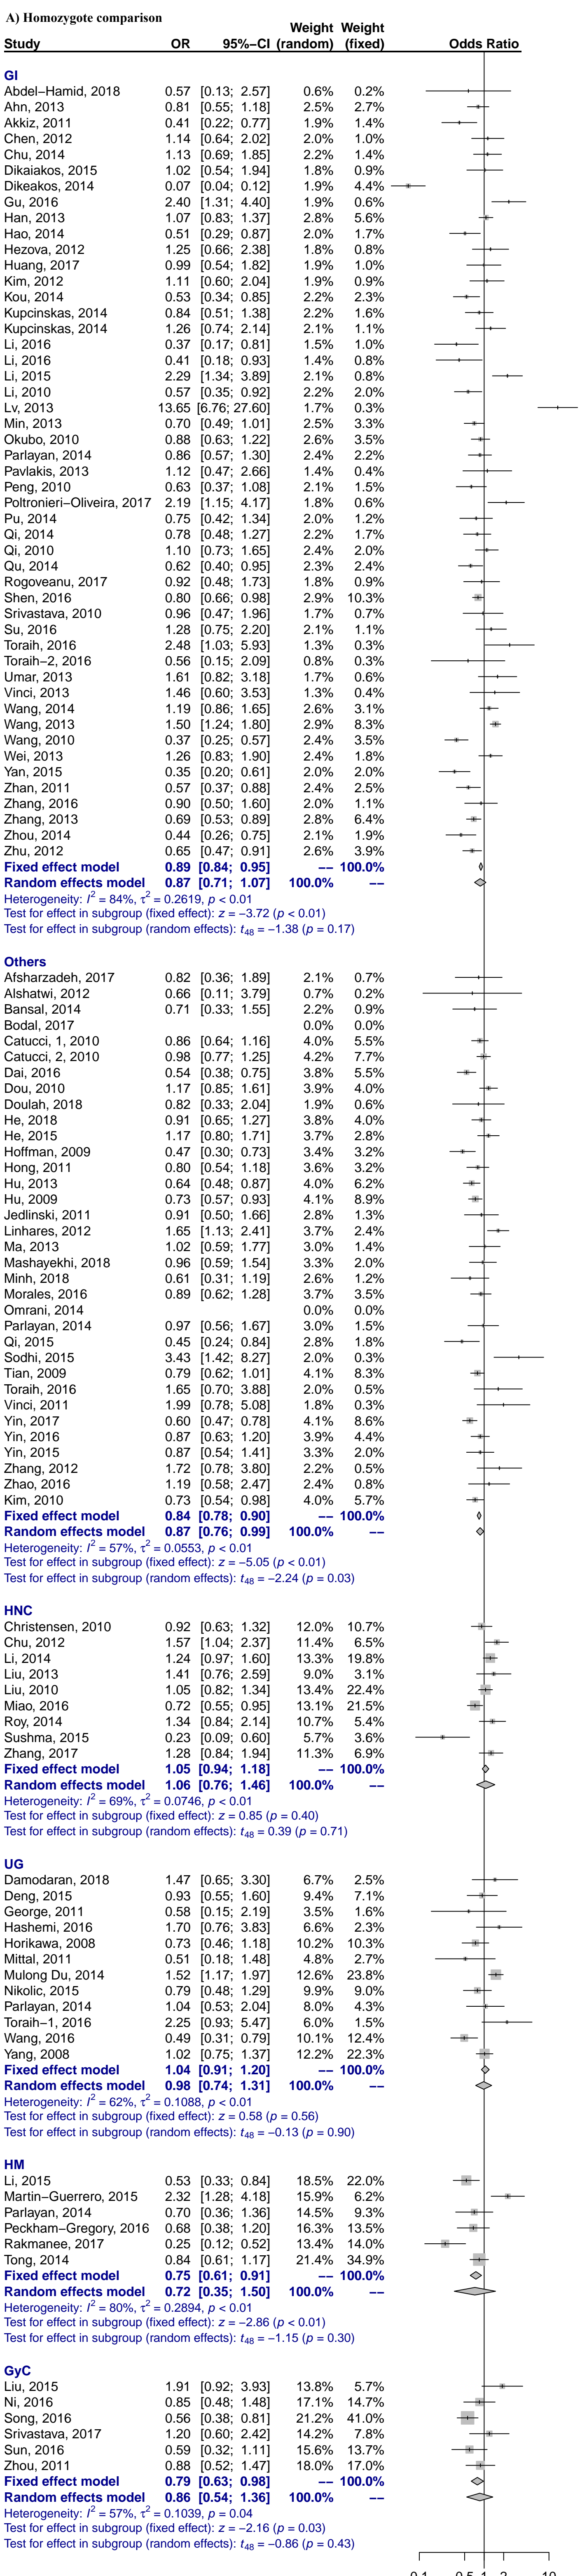



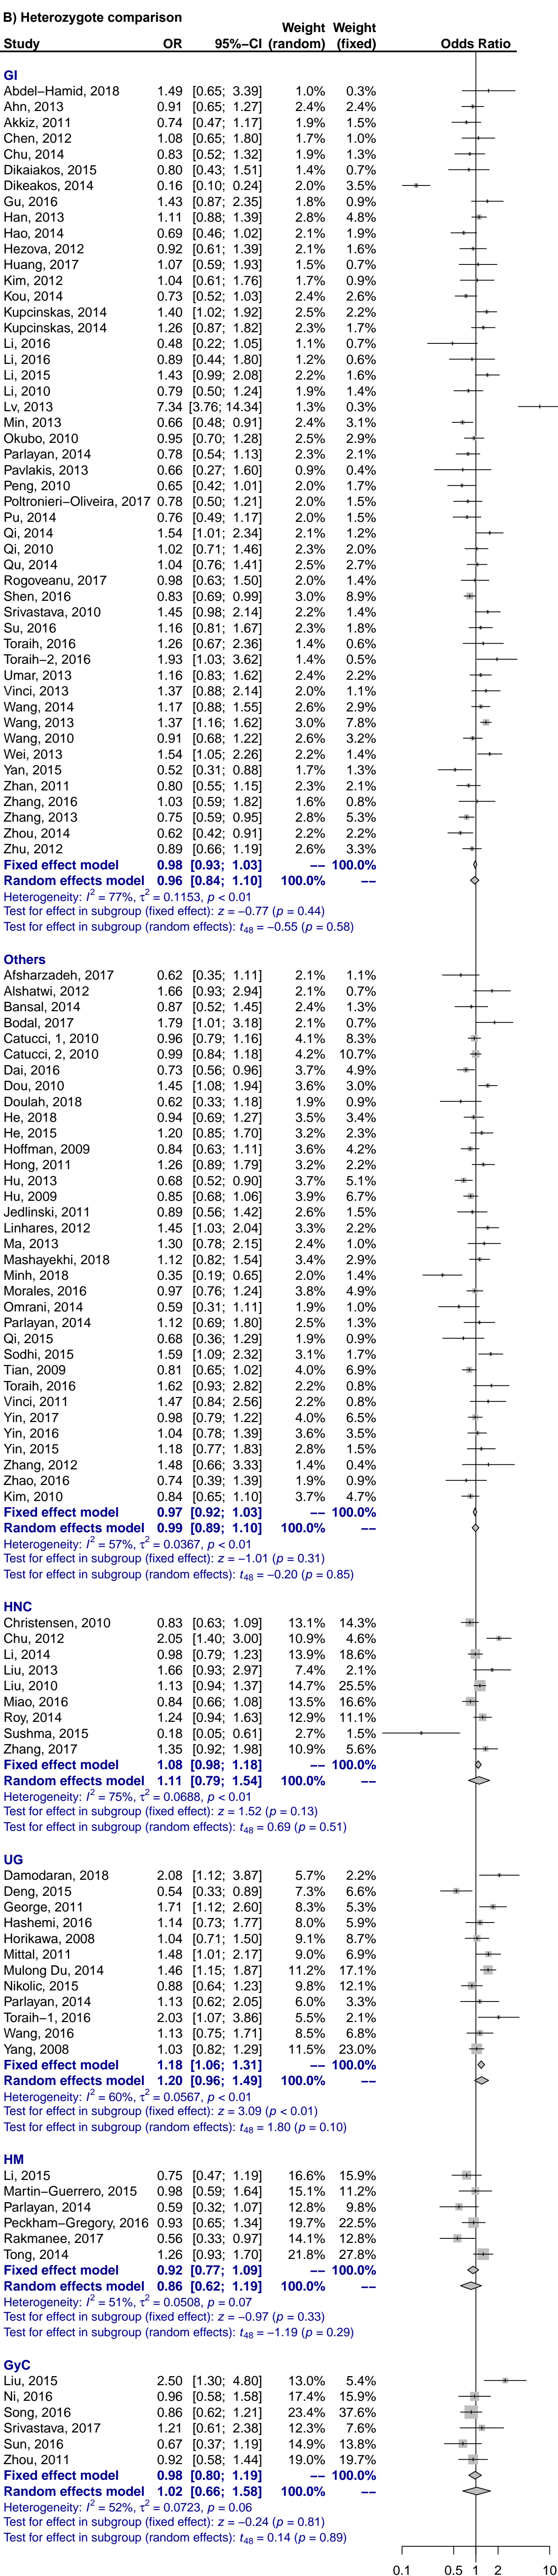



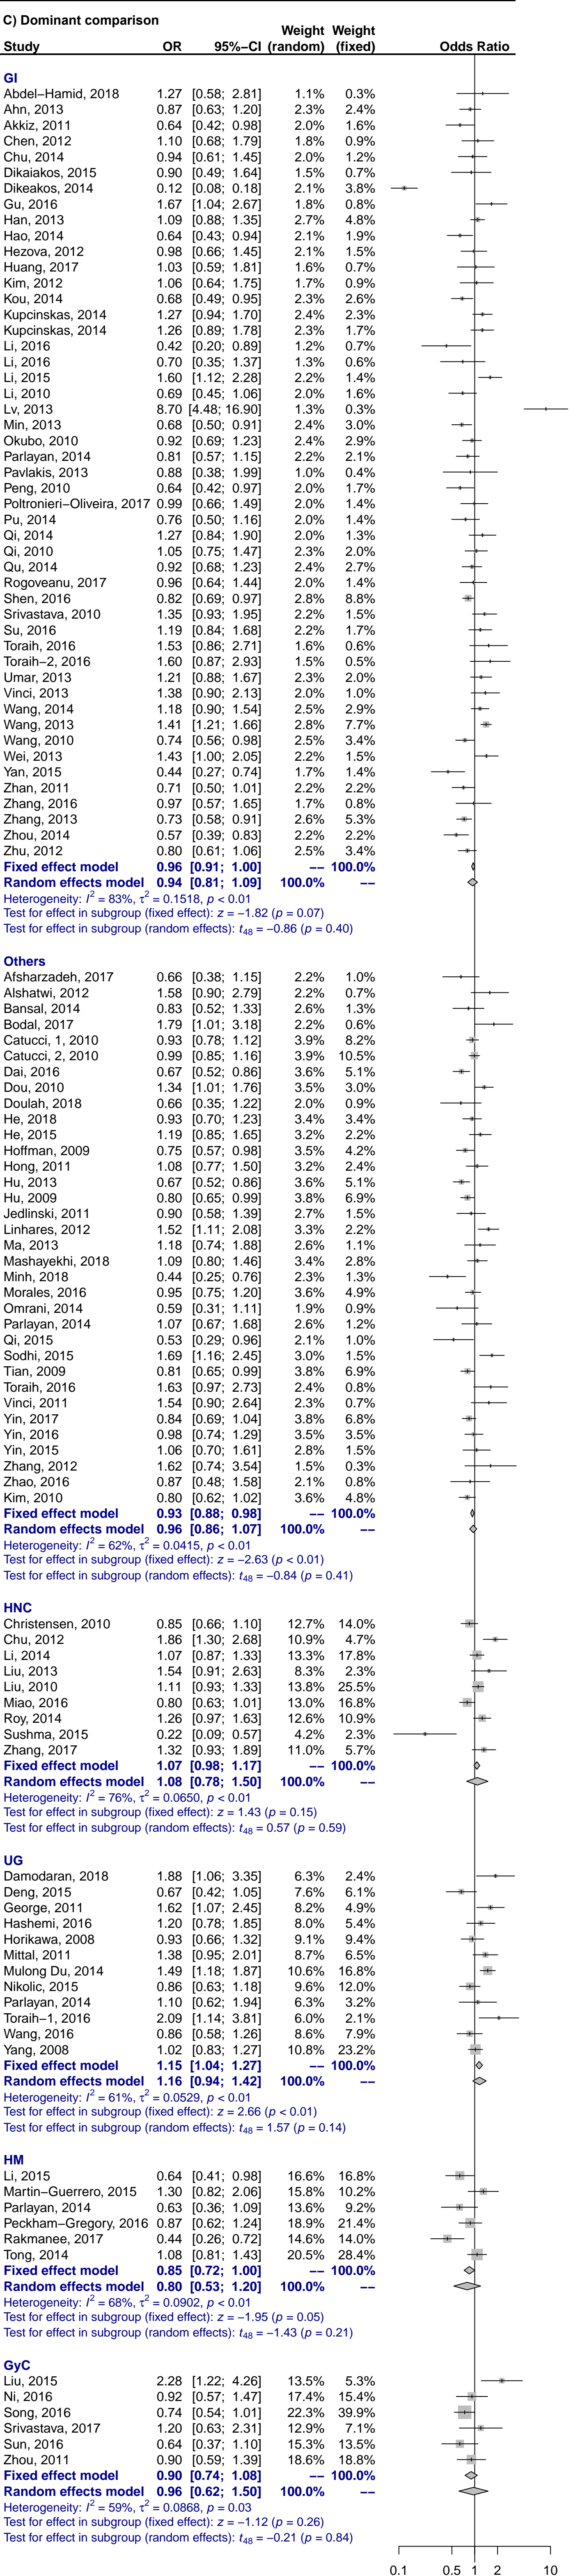



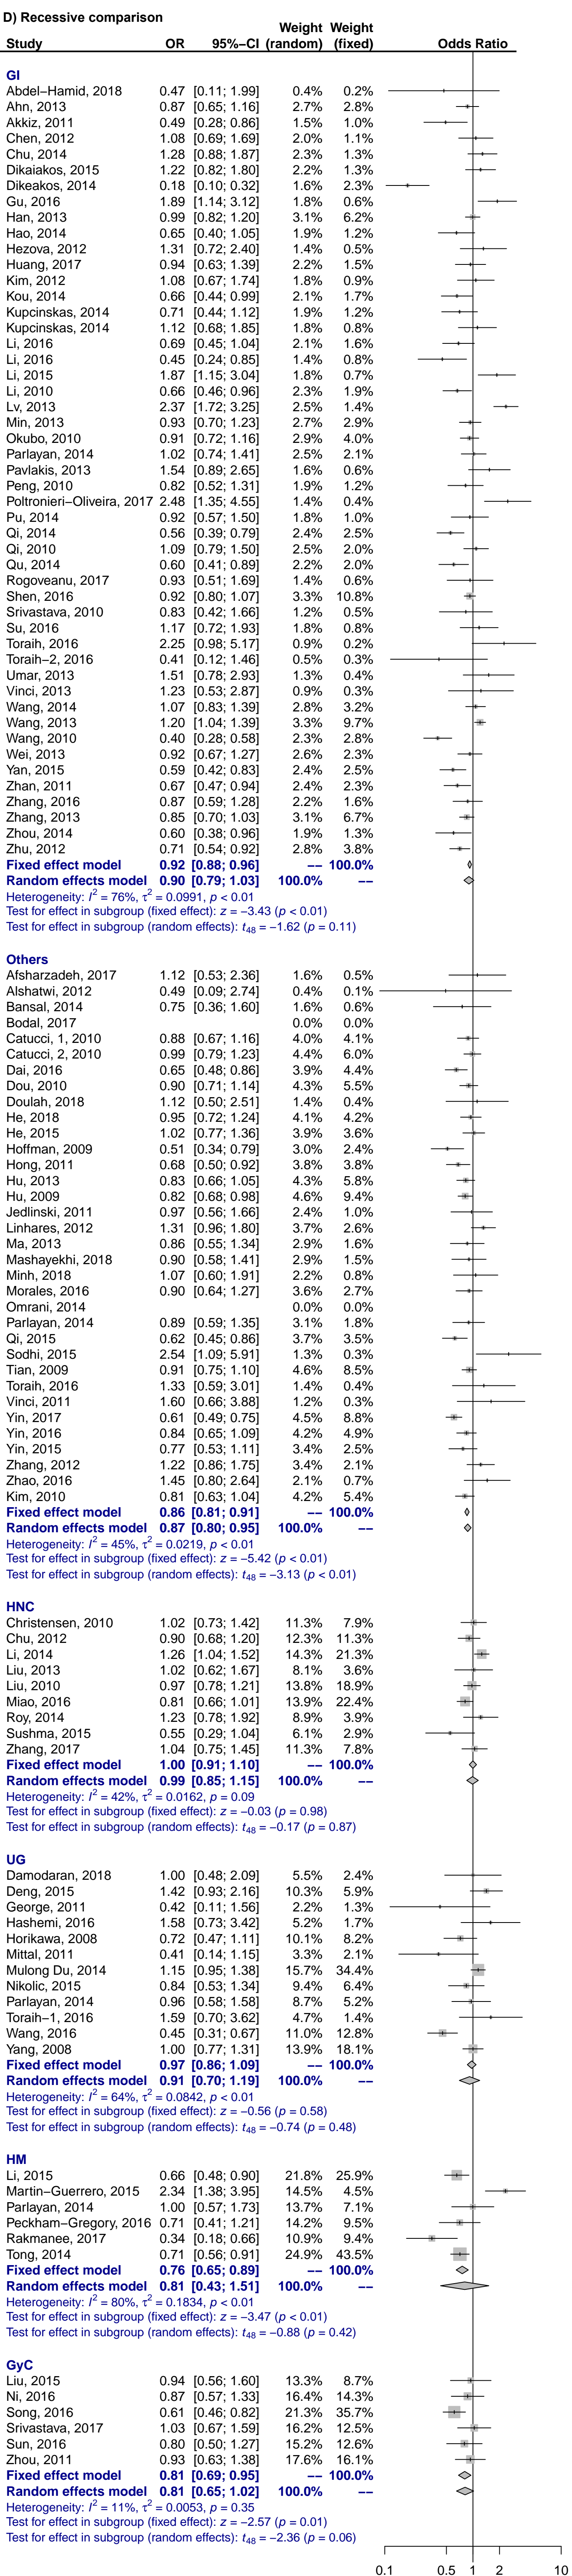



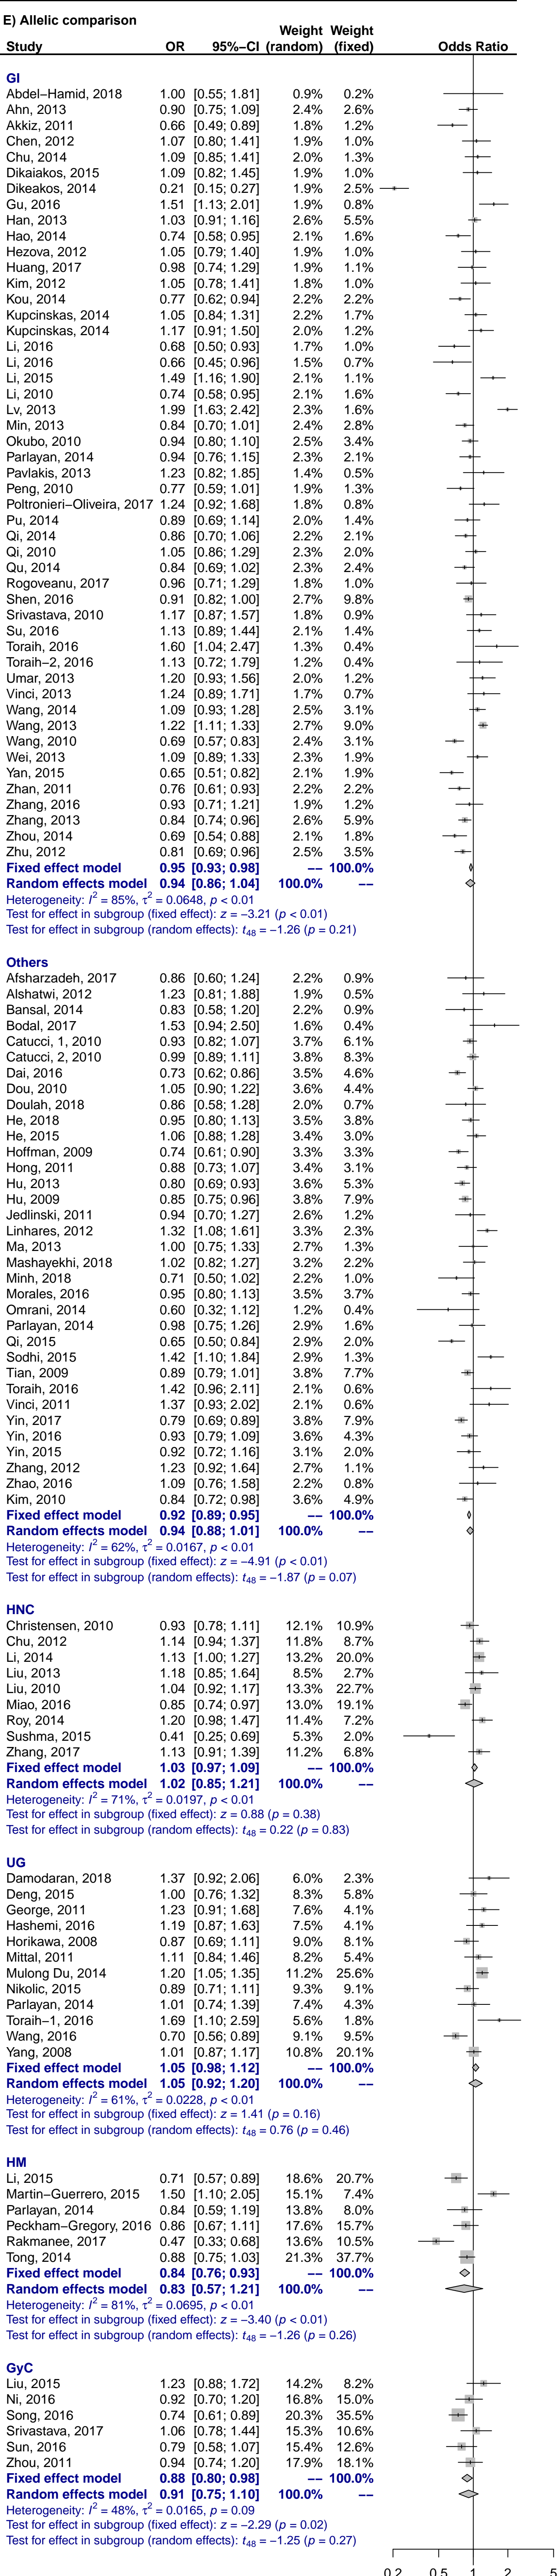

Supplement: Supplementary file 8 [file 14617067]
